# Supplementary material for: The Collaborative Model of Statutory Interpretation
Source: HighWire-hosted journal article supplement (doi:10.1136/bmjopen-2012-001649), 1988-01-01
Supplement: bmjopen-2012-001649.draft_revisions.pdf [file bmjopen-2012-001649.draft_revisions.pdf]

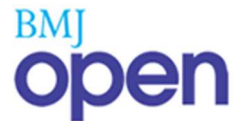

**Does an intervention programme reduce the risk of obstetric anal sphincter injury? A cohort study**

|                                 |                                                                                                                                                                                                                                                                                                                                                                                                                                    |
|---------------------------------|------------------------------------------------------------------------------------------------------------------------------------------------------------------------------------------------------------------------------------------------------------------------------------------------------------------------------------------------------------------------------------------------------------------------------------|
| Journal:                        | <i>BMJ Open</i>                                                                                                                                                                                                                                                                                                                                                                                                                    |
| Manuscript ID:                  | bmjopen-2012-001649                                                                                                                                                                                                                                                                                                                                                                                                                |
| Article Type:                   | Research                                                                                                                                                                                                                                                                                                                                                                                                                           |
| Date Submitted by the Author:   | 11-Jun-2012                                                                                                                                                                                                                                                                                                                                                                                                                        |
| Complete List of Authors:       | Laine, Katariina; Oslo University Hospital, Department of Obstetrics; University of Oslo, Skjeldestad, Finn Egil; Women's Health and Perinatology Research Group, University of Tromsø, Norway, Department of Clinical Medicine Sandvik, Leiv; Oslo University Hospital, Oslo, Norway, Unit of Biostatistics and Epidemiology Staff, Annetine; Oslo University Hospital, Dept of Obstetrics and Dept of Gynaecology, Oslo, Norway, |
| <b>Primary Subject Heading</b>: | Reproductive medicine, obstetrics and gynaecology                                                                                                                                                                                                                                                                                                                                                                                  |
| Secondary Subject Heading:      | Reproductive medicine, obstetrics and gynaecology                                                                                                                                                                                                                                                                                                                                                                                  |
| Keywords:                       | Maternal medicine < OBSTETRICS, Urogynaecology < GYNAECOLOGY, EDUCATION & TRAINING (see Medical Education & Training), MEDICAL EDUCATION & TRAINING, obstetric anal sphincter injury, delivery                                                                                                                                                                                                                                     |
|                                 |                                                                                                                                                                                                                                                                                                                                                                                                                                    |

SCHOLARONE™  
Manuscripts

only

## Abstract

**Objective** To compare the incidence of obstetric anal sphincter injury in two time periods, before and after implementing a training programme for improved perineal support aimed at reducing the incidence of obstetric anal sphincter injury. The secondary aim was to study incidence of obstetric anal sphincter injury in subgroups defined by risk factors for OASIS.

**Design** Population based cohort study.

**Setting** University hospital setting in Oslo, Norway.

**Participants** Two cohorts of all delivering women in the largest hospital in Norway during two time periods (2003-2005 and 2008-2010) were studied. After excluding caesarean sections and preterm deliveries (< week 32), the study population consisted of 31 709 deliveries, among which 907 women were identified with obstetric anal sphincter injury.

**Main outcome measures**

Information on maternal, obstetrical and fetal risk factors for OASIS was collected from the hospital obstetric database. Univariate analyses and multivariate logistic regression analyses, presenting adjusted odds ratios for OASIS, were performed.

**Results** The OASIS incidence was significantly reduced by 50%, from 4.0% (591/14787) in the first time period to 1.9% (316/16922) in the second. This reduction could not be explained by changes in population characteristics or OASIS risk factors during the study years. The reduction of incidence of OASIS between the two study periods was consistent across subgroups of women; regardless of parity, delivery method and infant birth weight.

**Conclusion** A marked reduction in the incidence of OASIS occurred in all studied subgroups of women after implementing the training programme for perineal protection. The training programme is a low-resource and low-cost intervention and is easily generalisable and applicable to other settings.

Effective perineal protection procedures aiming at reducing incidence of OASIS should be offered to all delivering women, not only to women in high risk groups.

## Introduction

Obstetric anal sphincter injury (OASIS) is a serious maternal complication during a vaginal delivery with reported incidences varying from 1 to 6%, [1-5], and occurs even in otherwise uncomplicated deliveries. OASIS may cause pain, discomfort and anal incontinence (AI), [6-8].

1  
2  
3 Risk factors for OASIS have been widely studied, with several hundred studies  
4 presently available in PubMed, assessing maternal, obstetric and fetal risk factors. Numerous  
5 factors have been investigated and focus has often been on factors that are not modifiable,  
6 such as maternal age, height, weight, ethnicity, fetal weight and head size. Most previous  
7 studies conclude that primiparity, large infant birth weight and instrumental delivery increase  
8 the risk of OASIS, but when exploring factors such as maternal age (young or advanced),  
9 ethnicity, epidural use and episiotomy, the results are conflicting,[9-14]. Risk factors  
10 unrelated to the delivering woman or the infant size, such as the accoucheurs' management of  
11 the second stage of delivery, have been less investigated.  
12  
13  
14  
15  
16  
17  
18  
19  
20  
21  
22

23 The incidence of OASIS varies between countries and delivery units,[3-5, 15]. A  
24 steadily increasing incidence of OASIS has been reported in the Nordic countries over the last  
25 decades,[2, 5, 15, 16]. Factors such as alterations in patient population over time (increasing  
26 maternal age, larger infants and increased use of instrumental delivery) have been studied, but  
27 such factors cannot alone explain the increasing OASIS incidence [5, 15]. In 2004 the  
28 Norwegian National Board of Health criticized the delivery units for a high incidence of  
29 OASIS, at that time being 4.5% of vaginal deliveries, and required that hospitals should  
30 implement programs to reduce the OASIS incidence. Programs to introduce manual perineal  
31 protection in the second stage of delivery were implemented in many Norwegian hospitals,  
32 and a reduction in OASIS incidence was achieved,[17, 18]. Similar association between  
33 changed clinical routines during the second stage of delivery and a reduction in OASIS  
34 incidence is described in a U.S. study,[19].  
35  
36  
37  
38  
39  
40  
41  
42  
43  
44  
45  
46  
47  
48

49 In the Obstetric Department at Oslo University Hospital, Ullevål, attempts to reduce  
50 the OASIS incidence were developed in steps, starting in 2006 with more focus on the OASIS  
51 issue in clinical meetings, whereas practical training to improve protection of perineum during  
52  
53  
54  
55  
56  
57  
58  
59  
60

1  
2  
3 second stage of delivery started in 2008. Such training programmes have previously been  
4  
5 described in two studies,[17, 18].  
6

7 The primary aim of the present study was to compare the incidence of OASIS across  
8  
9 two time periods, before and after implementing a training program for perineal protection  
10  
11 during second stage of delivery, aimed at reducing the incidence of OASIS. A secondary aim  
12  
13 was to study the OASIS incidence in subgroups of women defined by risk factors.  
14  
15

## 16 17 **Methods**

18  
19  
20 The study was conducted as an observational cohort study, in the largest delivery unit in  
21  
22 Norway, at a university hospital with an unselected patient population in Oslo, with 7000  
23  
24 deliveries annually. Two cohorts from two time periods were studied, 2003-2005 and 2008-  
25  
26 2010, before and after the intervention with a training program for manual perineal protection  
27  
28 during the second stage of delivery.  
29  
30  
31  
32

## 33 34 **Databases and participants**

35  
36 Data was obtained from the hospital obstetric database, the electronic hospital discharge  
37  
38 register, individual electronic and paper-based medical charts, and from the manually  
39  
40 assembled labour protocols at the delivery unit, during the time period 2003 to 2010. Two  
41  
42 cohorts were chosen to the study, 2003-2005 and 2008-2010.  
43  
44

45 Women with obstetric anal sphincter injury (OASIS) were identified from the labour  
46  
47 protocols at the delivery unit and validated against individual electronic and paper-based  
48  
49 medical charts (by the first author: KL). Surgery notes for the OASIS repair in the medical  
50  
51 record for each case were carefully read, and false positive cases were excluded (n=22). In  
52  
53 addition, patients with the diagnosis OASIS (ICD-10 code O70.2 or O70.3) were identified  
54  
55 from the electronic hospital discharge register and 13 additional patients with OASIS were  
56  
57  
58  
59  
60

1  
2  
3 identified. After excluding women delivered with caesarean section, preterm deliveries (<  
4 week 32), triplets and quadruplets, the study population comprised 31 709 deliveries, of  
5 which 907 women with OASIS.  
6  
7  
8

### 11 **Definition and diagnostics of OASIS**

14 Obstetric anal sphincter injury was defined as any degree of injury in the anal sphincter  
15 muscle (3A, 3B, 3C and 4<sup>th</sup> degree perineal tears, identified by the diagnoses O70.2 and  
16 O70.3 in the ICD-10 system),[20].  
17  
18  
19

20 In Norway, spontaneous deliveries are attended by midwives whereas instrumental  
21 deliveries are handled by physicians. To increase safety during delivery for both the mother  
22 and the infant, the procedure at our department requires at least two accoucheurs (two  
23 midwives or one midwife and a physician) attending the second and third stage of each  
24 delivery. If the midwife suspects OASIS, a physician attends the labour room and evaluates  
25 and classifies the degree of perineal tear. The written procedure of the department is that a  
26 standardized surgical OASIS repair (end-to-end technique) is always performed under direct  
27 surveillance of an experienced obstetrician or gynecologist (consultant).  
28  
29  
30  
31  
32  
33  
34  
35  
36  
37  
38  
39

### 40 **Risk factors for OASIS**

42 Information on maternal, obstetrical and fetal risk factors for OASIS was collected, including  
43 maternal age, parity, year of delivery, labour induction, delivery method, duration of second  
44 stage of labour, epidural use, episiotomy, persistent occiput posterior presentation, shoulder  
45 dystocia, infant birth weight and infant head circumference (Table 1).  
46  
47  
48  
49  
50  
51  
52  
53

54 Table 1 Clinical characteristics and obstetric interventions for the whole study population.  
55 Data are presented in frequencies (and numbers). *P*-values from Chi-square test.  
56  
57  
58  
59  
60

| Time period                                | Primiparous women |               | Multiparous women |               |
|--------------------------------------------|-------------------|---------------|-------------------|---------------|
|                                            | 2003-05           | 2008-10       | 2003-05           | 2008-10       |
| n vaginal deliveries                       | n=8051            | n=8837        | n=6736            | n=8085        |
| <b>Risk factors</b>                        |                   |               |                   |               |
| <b>Age, years</b>                          | <i>P</i> <0.001   |               | <i>P</i> <0.001   |               |
| 15-29                                      | 48.3 (n=3885)     | 43.8 (n=3872) | 27.4 (n=1849)     | 21.4 (n=1730) |
| 30-34                                      | 39.3 (n=3164)     | 40.8 (n=3604) | 42 (n=2823)       | 40.7 (n=3287) |
| 35-51                                      | 12.4 (n=1002)     | 15.4 (n=1361) | 30.6 (n=2064)     | 37.9 (n=3068) |
| <b>Birthweight, grams</b>                  | <i>P</i> =0.003   |               | <i>P</i> =0.60    |               |
| 720-2999                                   | 16.4 (n=1321)     | 16.4 (n=1446) | 11.8 (n=794)      | 11.6 (n=938)  |
| 3000-3499                                  | 37.9 (n=3050)     | 39.3 (n=3470) | 32.5 (n=2191)     | 32 (n=2591)   |
| 3500-3999                                  | 33.2 (n=2670)     | 33.8 (n=2983) | 36.3 (n=2447)     | 37.5 (n=3029) |
| 4000-4499                                  | 11.0 (n=885)      | 9.3 (n=821)   | 15.6 (n=1049)     | 15.4 (n=1247) |
| 4500-5850                                  | 1.6 (n=125)       | 1.3 (n=117)   | 3.8 (n=255)       | 3.5 (n=280)   |
| <b>Delivery method</b>                     | <i>P</i> <0.001   |               | <i>P</i> =0.45    |               |
| Spontaneous                                | 81.5 (n=6558)     | 78.3 (n=6918) | 96.2 (n=6479)     | 96.4 (n=7793) |
| Ventouse                                   | 16.5 (n=1331)     | 20.4 (n=1802) | 3.5 (n=234)       | 3.4 (n=273)   |
| Forceps                                    | 2.0 (n=162)       | 1.3 (n=117)   | 0.3 (n=23)        | 0.2 (n=19)    |
| <b>Episiotomy, all vaginal deliveries</b>  | <i>P</i> <0.001   |               | <i>P</i> =0.066   |               |
|                                            | 31.4 (n=2528)     | 36.2 (n=3203) | 7.3 (n=492)       | 8.1 (n=656)   |
| <b>Episiotomy, spontaneous deliveries</b>  | <i>P</i> =0.006   |               | <i>P</i> =0.98    |               |
|                                            | 24.7 (n=1620)     | 22.7 (n=1569) | 6.1 (n=396)       | 6.1 (n=477)   |
| <b>Episiotomy, instrumental deliveries</b> | <i>P</i> <0.001   |               | <i>P</i> <0.001   |               |
|                                            | 60.8 (n=908)      | 85.1 (n=1634) | 37.4 (n=96)       | 61.3 (n=179)  |
| <b>Duration 2<sup>nd</sup> stage, min</b>  | <i>P</i> =0.057   |               | <i>P</i> =0.45    |               |

### The intervention programme

1  
2  
3 The need to reduce the incidence of OASIS was discussed among delivery personnel in  
4 clinical meetings from 2006. An intervention programme was implemented from 2008,  
5 including both midwives and physicians at the Department of Obstetrics and Gynaecology.  
6  
7 First part of the training included a practical hands-on training on a pelvic delivery model and  
8 the second part included hands-on supervision during the second stage of delivery. The  
9  
10 perineum protection programme consisted of four components during the last part of second  
11 stage of delivery, when the baby's head is crowning: slowing the delivery of the baby's head  
12 with one hand, supporting perineum with the other hand and asking the delivering woman not  
13 to push. The fourth part of the intervention was education in correct performing of  
14 episiotomy. At our department, episiotomy is performed only when indicated, for example  
15 due to fetal distress or imminent severe perineal tear. The main focus of this intervention step  
16 was to avoid median cuts of episiotomy technique, when performed, due to the augmented  
17 risk of OASIS associated with median episiotomies,[21].  
18  
19  
20  
21  
22  
23  
24  
25  
26  
27  
28  
29  
30  
31  
32  
33

### 34 **Comparison of groups**

35  
36 The clinical characteristics of the study participants in the first (2003-2005) and second  
37 (2008-2010) time period were compared in order to identify possible population differences  
38 of delivering women between the two time periods (Table 1).  
39  
40  
41  
42  
43  
44

### 45 **Statistical analysis**

46  
47 Incidence of obstetric anal sphincter injury was calculated from vaginal deliveries only and  
48 the data were stratified according to parity. Parity was adjusted to vaginal parity; women with  
49 one previous caesarean delivery only (never having delivered vaginally before) were  
50 categorized as "vaginal primiparous" (n=440).  
51  
52  
53  
54  
55  
56  
57  
58  
59  
60

Continuous data were categorised and the independent variables are presented as frequencies. Univariate analysis was performed to explore the significant risk factors. Significant and borderline-significant variables were included in the multivariate analysis. Univariate analyses were performed by Chi-square test. A significance level of 5% was chosen in all analyses. Adjusted odds ratios (aORs) for OASIS with 95% CI are reported from multivariate logistic regression analyses. The data were analyzed by using PASW (Predictive Analytics Software, SPSS Inc., version 19.0, Chicago, IL).

## Results

Overall incidence of anal sphincter injury in vaginal deliveries was significantly reduced by 50%, from 4.0% (591/14787) in the first time period (2003-5) to 1.9% (316/16922) in the second time period (2008-10). The reduction of OASIS incidence was of similar magnitude across all studied subgroups defined by risk factors, for both primi- and multiparous women (Table 2).

Table 2 Incidence of OASIS in different subgroups of women. Data are presented in frequencies (and numbers). *P*-values from Chi-square test.

| Time period               | Primiparous women |                | Multiparous women |                |               |          |
|---------------------------|-------------------|----------------|-------------------|----------------|---------------|----------|
|                           | 2003-05           | 2008-10        |                   | 2003-05        | 2008-10       |          |
| OASIS                     | 6.1 (489/8051)    | 3.0 (263/8837) |                   | 1.5 (102/6736) | 0.7 (53/8085) |          |
| <b>Risk factors</b>       |                   |                |                   |                |               |          |
| Age, years                |                   |                | <i>P</i>          |                |               | <i>P</i> |
| 15-29                     | 5.5 (212/3885)    | 2.8 (107/3872) | <0.001            | 1.4 (25/1849)  | 0.5 (9/1730)  | 0.01     |
| 30-34                     | 6.7 (212/3164)    | 3.3 (118/3604) | <0.001            | 1.6 (45/2823)  | 0.7 (22/3287) | 0.001    |
| 35-51                     | 6.5 (65/1002)     | 2.8 (38/1361)  | <0.001            | 1.6 (32/2064)  | 0.7 (22/3068) | 0.004    |
| <b>Birthweight, grams</b> |                   |                |                   |                |               |          |



|                                            |                 |                |        |               |               |        |
|--------------------------------------------|-----------------|----------------|--------|---------------|---------------|--------|
| 720-2999                                   | 3.0 (39/1321)   | 1.6 (23/1446)  | 0.016  | 0.4 (3/794)   | 0.5 (5/938)   | 0.63   |
| 3000-3499                                  | 4.4 (135/3050)  | 2.6 (90/3470)  | <0.001 | 0.8 (18/2191) | 0.4 (10/2591) | 0.049  |
| 3500-3999                                  | 7.2 (192/2670)  | 3.4 (101/2983) | <0.001 | 1.3 (33/2447) | 0.6 (19/3029) | 0.006  |
| 4000-4499                                  | 11.2 (99/885)   | 4.8 (39/821)   | <0.001 | 3.2 (34/1049) | 0.7 (9/1247)  | <0.001 |
| 4500-5850                                  | 19.2 (24/125)   | 8.5 (10/117)   | 0.017  | 5.5 (14/255)  | 3.6 (10/280)  | 0.28   |
| <b>Delivery method</b>                     |                 |                |        |               |               |        |
| Spontaneous                                | 4.8 (318/6558)  | 2.5 (170/6918) | <0.001 | 1.4 (91/6479) | 0.6 (45/7793) | <0.001 |
| Ventouse                                   | 10.8 (144/1331) | 5.0 (90/1802)  | <0.001 | 3.4 (8/234)   | 2.9 (8/273)   | 0.75   |
| Forceps                                    | 16.7 (27/162)   | 2.6 (3/117)    | <0.001 | 13.0 (3/23)   | 0 (0/19)      | 0.10   |
| <b>Episiotomy, all deliveries</b>          |                 |                |        |               |               |        |
| Yes                                        | 6.6 (166/2528)  | 3.0 (96/3203)  | <0.001 | 2.0 (10/492)  | 1.8 (12/656)  | 0.80   |
| No                                         | 5.8 (323/5523)  | 3.0 (167/5634) | <0.001 | 1.5 (92/6244) | 0.6 (41/7429) | <0.001 |
| <b>Episiotomy, spontaneous deliveries</b>  |                 |                |        |               |               |        |
| Yes                                        | 4.0 (65/1620)   | 2.2 (34/1569)  | <0.003 | 1.3 (5/396)   | 1.3 (6/477)   | 1.00   |
| No                                         | 5.1 (253/4938)  | 2.5 (136/5349) | <0.001 | 1.4 (86/6083) | 0.5 (39/7316) | <0.001 |
| <b>Episiotomy, instrumental deliveries</b> |                 |                |        |               |               |        |
| Yes                                        | 11.1 (101/908)  | 3.8 (62/1634)  | <0.001 | 5.2 (5/96)    | 3.4 (6/179)   | 0.45   |
| No                                         | 12.0 (70/585)   | 10.9 (31/285)  | 0.64   | 3.7 (6/161)   | 1.8 (2/113)   | 0.34   |
| <b>Duration 2<sup>nd</sup> stage, min</b>  |                 |                |        |               |               |        |
| 0-09                                       | 4.6 (13/281)    | 3.3 (9/273)    | 0.42   | 0.9 (20/2335) | 0.4 (10/2390) | 0.058  |
| 10-29                                      | 4.0 (99/2455)   | 2.9 (74/2591)  | 0.02   | 1.5 (50/3361) | 0.5 (21/4505) | <0.001 |
| 30-59                                      | 5.5 (180/3290)  | 2.5 (93/3673)  | <0.001 | 2.9 (24/839)  | 1.7 (16/957)  | 0.09   |
| 60-205                                     | 9.7 (193/1994)  | 3.8 (87/2288)  | <0.001 | 4.0 (7/174)   | 2.3 (5/219)   | 0.32   |
| <b>Epidural</b>                            |                 |                |        |               |               |        |
| Yes                                        | 6.5 (228/3494)  | 3.0 (128/4267) | <0.001 | 2.0 (20/1008) | 0.8 (12/1419) | 0.015  |

|    |                          |                |                |        |                |               |        |
|----|--------------------------|----------------|----------------|--------|----------------|---------------|--------|
| 1  |                          |                |                |        |                |               |        |
| 2  |                          |                |                |        |                |               |        |
| 3  | No                       | 5.7 (261/4557) | 3.0 (135/4570) | <0.001 | 1.4 (82/5728)  | 0.6 (41/6666) | <0.001 |
| 4  |                          |                |                |        |                |               |        |
| 5  | <b>Shoulder dystocia</b> |                |                |        |                |               |        |
| 6  |                          |                |                |        |                |               |        |
| 7  | Yes                      | 15.8 (12/76)   | 14.1 (9/64)    | 0.78   | 5.7 (5/87)     | 4.1 (3/73)    | 0.64   |
| 8  |                          |                |                |        |                |               |        |
| 9  | No                       | 6.0 (477/7975) | 2.9 (254/8773) | <0.001 | 1.5 (97/6649)  | 0.6 (50/8012) | <0.001 |
| 10 |                          |                |                |        |                |               |        |
| 11 | <b>Occiput posterior</b> |                |                |        |                |               |        |
| 12 |                          |                |                |        |                |               |        |
| 13 | <b>presentation</b>      |                |                |        |                |               |        |
| 14 |                          |                |                |        |                |               |        |
| 15 | Yes                      | 11.4 (20/176)  | 6.9 (17/245)   | 0.11   | 0.7 (1/150)    | 1.7 (4/237)   | 0.39   |
| 16 |                          |                |                |        |                |               |        |
| 17 | No                       | 6.0 (469/7875) | 2.9 (246/8592) | <0.001 | 1.5 (101/6586) | 0.6 (49/7848) | <0.001 |
| 18 |                          |                |                |        |                |               |        |
| 19 | <b>Induced labour</b>    |                |                |        |                |               |        |
| 20 |                          |                |                |        |                |               |        |
| 21 | Yes                      | 5.5 (75/1365)  | 3.0 (50/1650)  | 0.001  | 1.3 (12/903)   | 0.7 (9/1269)  | 0.18   |
| 22 |                          |                |                |        |                |               |        |
| 23 | No                       | 6.2 (414/6686) | 3.0 (213/7187) | <0.001 | 1.5 (90/5833)  | 0.6 (44/6816) | <0.001 |
| 24 |                          |                |                |        |                |               |        |

25

26

27

28 The incidence of OASIS over the study years is displayed in Figure 1, demonstrating a

29 reduced incidence of OASIS, which in time follows the implementation of the perineum

30 support program for the staff. Figure 1 also demonstrates a similar reduction of OASIS

31 incidence for the different delivery methods (operative and spontaneous vaginal delivery)

32 between the two study periods: in spontaneous deliveries the OASIS incidence was reduced

33 from 3.1% (409/13037) to 1.5% (215/14711) and in ventouse from 9.7% (152/1565) to 4.7%

34 (98/2075). Forceps is less used in our department, but a significant OASIS reduction was also

35 observed in forceps deliveries from 16.2% (30/185) to 2.2% (3/136).

36

37

38

39

40

41

42

43

44

45

46

#### 47 **Population characteristics across the study years**

48 Overall changes in population characteristics between the two time periods were small, but

49 the prevalence of older women (>35 years) was significantly higher in the second period

50 (2008-10), and use of ventouse delivery, episiotomy, epidural and induction of labour was

51

52

53

54

55

56

57

58

59

60

more frequent (Table 1). Primiparous women comprised 85% of the women with OASIS, but represented only 53.3 % of the overall study population.

### Primiparous women

In a univariate analysis, higher infant birth weight, larger infant head circumference (data not shown), prolonged second stage of labour, instrumental delivery, shoulder dystocia and persistent occiput posterior presentation were significant OASIS risk factors for primiparous women in the first study period (Table 3). In the second study period, the same OASIS risk factors remained significant, except for prolonged second stage of labour (Table 3).

Table 3 Clinical characteristics and obstetric interventions among primiparous women with OASIS and women without OASIS. Data are presented in frequencies (and numbers).

*P*-values from Chi-square test.

| Primiparous women         | 2003-05         |               | 2008-10         |               |
|---------------------------|-----------------|---------------|-----------------|---------------|
|                           | OASIS           | Non-OASIS     | OASIS           | Non-OASIS     |
| n deliveries              | n=489           | n=7562        | n=263           | n=8574        |
| Incidence OASIS           | 6.1 (489/7562)  |               | 3.0 (263/8574)  |               |
| <b>Risk factors</b>       | %               |               | %               |               |
| Age, years                | <i>P</i> =0.08  |               | <i>P</i> =0.39  |               |
| 15-29                     | 43.4 (n=212)    | 48.6 (n=3673) | 40.7 (n=107)    | 43.9 (n=3765) |
| 30-34                     | 43.4 (n=212)    | 39 (n=2952)   | 44.9 (n=118)    | 40.7 (n=3486) |
| 35-51                     | 13.3 (n=65)     | 12.4 (n=937)  | 14.4 (n=38)     | 15.4 (n=1323) |
| <b>Birthweight, grams</b> | <i>P</i> <0.001 |               | <i>P</i> <0.001 |               |
| 720-2999                  | 8.0 (n=39)      | 17.0 (n=1282) | 8.7 (n=23)      | 16.6 (n=1423) |
| 3000-3499                 | 27.6 (n=135)    | 38.5 (n=2915) | 34.2 (n=90)     | 39.4 (n=3380) |
| 3500-3999                 | 39.3 (n=192)    | 32.8 (n=2478) | 38.4 (n=101)    | 33.6 (n=2882) |
| 4000-4499                 | 20.2 (n=99)     | 10.4 (n=786)  | 14.8 (n=39)     | 9.1 (n=782)   |

|                                            |                 |               |                 |               |
|--------------------------------------------|-----------------|---------------|-----------------|---------------|
| 4500-5850                                  | 4.9 (n=24)      | 1.3 (n=101)   | 3.8 (n=10)      | 1.2 (n=107)   |
| <b>Delivery method</b>                     | <i>P</i> <0.001 |               | <i>P</i> <0.001 |               |
| Spontaneous                                | 65.0 (n=318)    | 82.5 (n=6240) | 64.6 (n=170)    | 78.7 (n=6748) |
| Ventouse                                   | 29.4 (n=144)    | 15.7 (n=1187) | 34.2 (n=90)     | 20.0 (n=1712) |
| Forceps                                    | 5.5 (n=27)      | 1.8 (n=135)   | 1.1(n=3)        | 1.3(n=114)    |
| <b>Episiotomy, all vaginal deliveries</b>  | <i>P</i> =0.21  |               | <i>P</i> =0.93  |               |
|                                            | 33.9 (n=166)    | 31.2 (n=2362) | 36.5 (n=96)     | 36.2 (n=3107) |
| <b>Episiotomy, spontaneous deliveries</b>  | <i>P</i> =0.07  |               | <i>P</i> =0.40  |               |
|                                            | 20.4 (n=65)     | 24.9 (n=1555) | 20.0 (n=34)     | 22.7 (n=1535) |
| <b>Episiotomy, instrumental deliveries</b> | <i>P</i> <0.001 |               | <i>P</i> <0.001 |               |
|                                            | 59.1 (n=101)    | 61.0 (n=807)  | 66.7 (n=62)     | 86.1 (n=1572) |
| <b>Duration 2<sup>nd</sup> stage, min</b>  | <i>P</i> <0.001 |               | <i>P</i> =0.07  |               |
| 0-09                                       | 2.7 (n=13)      | 3.5 (n=268)   | 3.4 (n=9)       | 3.1 (n=264)   |
| 10-29                                      | 20.2 (n=99)     | 31.2 (n=2356) | 28.1 (n=74)     | 29.4 (n=2517) |
| 30-59                                      | 36.8 (n=180)    | 41.1 (n=3110) | 35.4 (n=93)     | 41.8 (n=3580) |
| 60-205                                     | 39.5 (n=193)    | 23.8 (n=1801) | 33.1 (n=87)     | 25.7 (n=2201) |
| Missing data (n=4/n=27)                    | 0.8 (n=4)       | 0.4 (n=27)    | 0 (n=0)         | 0.1 (n=12)    |
| <b>Epidural</b>                            | <i>P</i> =0.14  |               | <i>P</i> =0.90  |               |
|                                            | 46.6 (n=228)    | 43.2 (n=3266) | 48.7 (n=128)    | 48.3 (n=4139) |
| <b>Shoulder dystocia</b>                   | <i>P</i> <0.001 |               | <i>P</i> <0.001 |               |
|                                            | 2.5 (n=12)      | 0.8 (n=64)    | 3.4 (n=9)       | 0.6 (n=55)    |
| <b>Occiput posterior presentation</b>      | <i>P</i> =0.003 |               | <i>P</i> <0.001 |               |
|                                            | 4.1 (n=20)      | 2.1 (n=156)   | 6.5 (n=17)      | 2.7 (n=228)   |
| <b>Induced labour</b>                      | <i>P</i> =0.32  |               | <i>P</i> =0.89  |               |
|                                            | 15.3 (n=75)     | 17.1 (n=1290) | 19.0 (n=50)     | 18.7 (n=18.7) |

In a multivariate regression analysis (Table 4), large infant birth weight, instrumental delivery, prolonged second stage and occiput posterior presentation were significant risk factors for OASIS in the first study period. In the second study period, when the incidence of OASIS was reduced, only instrumental delivery and fetal occiput posterior presentation remained significant risk factors for OASIS. The OASIS risk was markedly reduced from the first to the second time period and the first time period emerged as one of the most important OASIS “risk factors” in our study. OR for OASIS in the logistic regression analysis for the first study period as compared to the second was 2.10 (95% CI 1.76 to 2.40).

Table 4 Risk factors for OASIS in the multivariate regression model (adjusted odds ratio (aOR) and 95% confidence intervals).

| Time period               | Primiparous women   |                     | Multiparous women   |                     |
|---------------------------|---------------------|---------------------|---------------------|---------------------|
|                           | 2003-05             | 2008-10             | 2003-05             | 2008-10             |
| n vaginal deliveries      | n=8051              | n=8837              | n=6736              | n=8085              |
| n OASIS                   | 489                 | 263                 | 102                 | 53                  |
| Incidence OASIS           | 6.0 %               | 3.0%                | 1.5%                | 0.7%                |
| <b>Risk factors</b>       | aOR (95% CI)        | aOR (95% CI)        | aOR (95% CI)        | aOR (95% CI)        |
| <b>Age, years</b>         |                     |                     |                     |                     |
| 15-29                     | 0.90 (0.72 to 1.08) | 0.90 (0.67 to 1.15) | 0.99 (0.60 to 1.64) | 0.86 (0.40 to 1.90) |
| 30-34                     | 1                   | 1                   | 1                   | 1                   |
| 35-51                     | 0.96 (0.71 to 1.28) | 0.84 (0.58 to 1.22) | 0.91 (0.57 to 1.44) | 0.95 (0.52 to 1.75) |
| <b>Birthweight, grams</b> |                     |                     |                     |                     |
| 720-3499                  | 0.70 (0.55 to 0.87) | 0.80 (0.60 to 1.08) | 0.46 (0.25 to 0.82) | 0.93 (0.44 to 1.94) |
| 3500-3999                 | 1                   | 1                   | 1                   | 1                   |
| 4000-5850                 | 1.50 (1.16 to 1.92) | 1.26 (0.87 to 1.83) | 2.81 (1.73 to 4.58) | 1.19 (0.58 to 2.45) |
| <b>Delivery method</b>    |                     |                     |                     |                     |
| Spontaneous               | 1                   | 1                   | 1                   | 1                   |

|                                           |                     |                     |                     |                      |
|-------------------------------------------|---------------------|---------------------|---------------------|----------------------|
| Instrumental                              | 2.10 (1.71 to 2.68) | 2.46 (1.74 to 3.47) | 2.19 (1.02 to 4.73) | 1.72 (0.64 to 4.66)  |
| <b>Episiotomy</b>                         |                     |                     |                     |                      |
| No                                        | 1                   | 1                   | 1                   | 1                    |
| Yes                                       | 0.72 (0.58 to 0.90) | 0.52 (0.38 to 0.73) | 0.92 (0.46 to 1.87) | 1.57 (0.71 to 3.49)  |
| <b>Duration 2<sup>nd</sup> stage, min</b> |                     |                     |                     |                      |
| 0-29                                      | 0.80 (0.62 to 1.02) | 1.18 (0.87 to 1.60) | 0.50 (0.31 to 0.82) | 0.34 (0.18 to 0.64)  |
| 30-59                                     | 1                   | 1                   | 1                   | 1                    |
| 60-205                                    | 1.40 (1.15 to 1.79) | 1.29 (0.95 to 1.75) | 1.03 (0.41 to 2.58) | 0.83 (0.28 to 2.48)  |
| <b>Epidural</b>                           |                     |                     |                     |                      |
| No                                        | 1                   | 1                   | 1                   | 1                    |
| Yes                                       | 0.95 (0.78 to 1.15) | 0.86 (0.67 to 1.12) | 1.15 (0.69 to 1.93) | 0.88 (0.44 to 1.76)  |
| <b>Shoulder dystocia</b>                  |                     |                     |                     |                      |
| No                                        | 1                   | 1                   | 1                   | 1                    |
| Yes                                       | 1.58 (0.83 to 1.39) | 3.73 (1.76 to 7.90) | 1.58 (0.60 to 4.16) | 2.25 (0.50 to 10.10) |
| <b>Occiput posterior presentation</b>     |                     |                     |                     |                      |
| No                                        | 1                   | 1                   | 1                   | 1                    |
| Yes                                       | 1.72 (1.04 to 2.82) | 2.40 (1.42 to 4.06) | 0.24 (0.03 to 1.78) | 1.95 (0.66 to 5.73)  |
| <b>Induced labour</b>                     |                     |                     |                     |                      |
| No                                        | 1                   | 1                   | 1                   | 1                    |
| Yes                                       | 0.77 (0.60 to 1.00) | 0.92 (0.66 to 1.27) | 0.86 (0.46 to 1.60) | 0.81 (0.37 to 1.77)  |

Frequency of episiotomy use in spontaneous deliveries of primiparous women was reduced from the first time period to the second, and increased in instrumental deliveries (Table 1). When adjusted for risk factors in the multivariate analysis, episiotomy appeared as a protective factor for OASIS in both time periods for primiparous women (Table 4).

Primiparous women with a previous caesarean section only, and no previous vaginal delivery (n=440), had an increased OASIS risk compared to women with no previous delivery OR=2.2 (95% CI 1.6 to 3.1), both in the first time period (11.5% and 5.9%, respectively,  $P=0.001$ ) and in the second (6.7% and 2.9%, respectively,  $P=0.001$ ). Also in this subgroup, the OASIS incidence was reduced with 50% after implementation of the perineal protection programme. When the various study analyses were performed without this small subgroup of vaginal primiparous women with one previous caesarean only, the study conclusions remained unaltered, as expected due to the small number of women in this subgroup.

### Multiparous women

In a univariate analysis for multiparous women (Table 5), instrumental delivery, prolonged second stage of delivery, shoulder dystocia, large infant head circumference (data not shown) and birth weight were significant risk factors for OASIS in both time periods. The OASIS risk was markedly reduced from the first to the second time period and the time period for the delivery was one of the most important “risk factors”; OR for OASIS in the logistic regression analysis for the first time period as compared to the second was 2.31 (95% CI 1.65 to 3.25).

Table 5 Clinical characteristics and obstetric interventions among multiparous women with OASIS and women without OASIS. Data are presented in frequencies (and numbers).

*P*-values from Chi-square test.

| Multiparous women   | 2003-05        |           | 2008-10       |           |
|---------------------|----------------|-----------|---------------|-----------|
|                     | OASIS          | Non-OASIS | OASIS         | Non-OASIS |
| n deliveries        | n=102          | n=6634    | n=53          | n=8032    |
| Incidence OASIS     | 1.5 (102/6634) |           | 0.7 (53/8032) |           |
| <b>Risk factors</b> | %              |           | %             |           |
| Age, years          | $P=0.79$       |           | $P=0.71$      |           |

|    |                                           |                 |               |                 |               |
|----|-------------------------------------------|-----------------|---------------|-----------------|---------------|
| 1  |                                           |                 |               |                 |               |
| 2  |                                           |                 |               |                 |               |
| 3  | 15-29                                     | 24.5 (n=25)     | 27.5 (n=1824) | 17.0 (n=9)      | 21.4 (n=1721) |
| 4  |                                           |                 |               |                 |               |
| 5  | 30-34                                     | 44.1 (n=45)     | 41.9 (n=2778) | 41.5 (n=22)     | 40.6 (n=3265) |
| 6  |                                           |                 |               |                 |               |
| 7  | 35-51                                     | 31.4 (n=32)     | 30.6 (n=2032) | 41.5 (n=22)     | 37.9 (n=3046) |
| 8  |                                           |                 |               |                 |               |
| 9  | <b>Birthweight, grams</b>                 | <i>P</i> <0.001 |               | <i>P</i> <0.001 |               |
| 10 |                                           |                 |               |                 |               |
| 11 | 720-2999                                  | 2.9 (n=3)       | 11.9 (n=791)  | 9.4 (n=5)       | 11.6 (n=933)  |
| 12 |                                           |                 |               |                 |               |
| 13 | 3000-3499                                 | 17.6 (n=18)     | 32.8 (n=2173) | 18.9 (n=10)     | 32.1 (n=2581) |
| 14 |                                           |                 |               |                 |               |
| 15 | 3500-3999                                 | 32.4 (n=33)     | 36.4 (n=2414) | 35.8 (n=19)     | 37.5 (n=3010) |
| 16 |                                           |                 |               |                 |               |
| 17 | 4000-4499                                 | 33.3 (n=34)     | 15.3 (n=1015) | 17.0 (n=9)      | 15.4 (n=1238) |
| 18 |                                           |                 |               |                 |               |
| 19 | 4500-5850                                 | 13.7 (n=14)     | 3.6 (n=241)   | 18.9 (n=10)     | 3.4 (n=270)   |
| 20 |                                           |                 |               |                 |               |
| 21 | <b>Delivery method</b>                    | <i>P</i> <0.001 |               | <i>P</i> <0.001 |               |
| 22 |                                           |                 |               |                 |               |
| 23 | Spontaneous                               | 89.2 (n=91)     | 96.3 (n=6388) | 84.9 (n=45)     | 96.5 (n=7748) |
| 24 |                                           |                 |               |                 |               |
| 25 | Ventouse                                  | 7.8 (n=8)       | 3.4 (n=226)   | 15.1 (n=8)      | 3.3 (n=265)   |
| 26 |                                           |                 |               |                 |               |
| 27 | Forceps                                   | 2.9 (n=3)       | 0.3 (n=20)    | 0 (n=0)         | 0.2 (n=19)    |
| 28 |                                           |                 |               |                 |               |
| 29 | <b>Episiotomy, all vaginal deliveries</b> | <i>P</i> =0.33  |               | <i>P</i> <0.001 |               |
| 30 |                                           |                 |               |                 |               |
| 31 |                                           | 9.8 (n=10)      | 7.3 (n=482)   | 22.6 (n=12)     | 8.0 (n=644)   |
| 32 |                                           |                 |               |                 |               |
| 33 | <b>Episiotomy, spontaneous deliveries</b> | <i>P</i> =0.80  |               | <i>P</i> =0.43  |               |
| 34 |                                           |                 |               |                 |               |
| 35 |                                           | 5.5 (n=5)       | 6.1 (n=391)   | 13.3 (n=6)      | 6.1 (n=471)   |
| 36 |                                           |                 |               |                 |               |
| 37 | <b>Episiotomy, instrumental</b>           | <i>P</i> =0.57  |               | <i>P</i> =0.42  |               |
| 38 |                                           |                 |               |                 |               |
| 39 | <b>deliveries</b>                         | 45.5 (n=5)      | 37.0 (n=91)   | 75 (n=6)        | 60.9 (n=173)  |
| 40 |                                           |                 |               |                 |               |
| 41 | <b>Duration 2<sup>nd</sup> stage, min</b> | <i>P</i> <0.001 |               | <i>P</i> <0.001 |               |
| 42 |                                           |                 |               |                 |               |
| 43 | 0-09                                      | 19.6 (n=20)     | 34.9 (n=2315) | 18.9 (n=10)     | 29.6 (n=2380) |
| 44 |                                           |                 |               |                 |               |
| 45 | 10-29                                     | 49.0 (n=50)     | 49.9 (n=3311) | 39.6 (n=21)     | 55.8 (n=4484) |
| 46 |                                           |                 |               |                 |               |
| 47 | 30-59                                     | 23.5 (n=24)     | 12.3 (n=815)  | 30.2 (n=16)     | 11.7 (n=941)  |
| 48 |                                           |                 |               |                 |               |
| 49 | 60-205                                    | 6.9 (n=7)       | 2.5 (n=167)   | 9.4 (n=5)       | 2.7 (n=214)   |
| 50 |                                           |                 |               |                 |               |
| 51 | Missing data (n=4/n=27)                   | 1.0 (n=1)       | 0.4 (n=26)    | 1.9 (n=1)       | 0.2 (n=13)    |
| 52 |                                           |                 |               |                 |               |
| 53 | <b>Epidural</b>                           | <i>P</i> =0.21  |               | <i>P</i> =0.36  |               |
| 54 |                                           |                 |               |                 |               |
| 55 |                                           | 19.6 (n=20)     | 14.9 (n=988)  | 22.6 (n=12)     | 17.5 (n=1407) |
| 56 |                                           |                 |               |                 |               |
| 57 |                                           |                 |               |                 |               |
| 58 |                                           |                 |               |                 |               |
| 59 |                                           |                 |               |                 |               |
| 60 |                                           |                 |               |                 |               |



|                                       |                 |              |                 |               |
|---------------------------------------|-----------------|--------------|-----------------|---------------|
| <b>Shoulder dystocia</b>              | <i>P</i> =0.001 |              | <i>P</i> <0.001 |               |
|                                       | 4.9 (n=5)       | 1.2 (n=82)   | 5.7 (n=3)       | 0.9 (n=70)    |
| <b>Occiput posterior presentation</b> | <i>P</i> =0.39  |              | <i>P</i> =0.046 |               |
|                                       | 1.0 (n=1)       | 2.2 (n=149)  | 7.5 (n=4)       | 2.9 (n=233)   |
| <b>Induced labour</b>                 | <i>P</i> =0.62  |              | <i>P</i> =0.80  |               |
|                                       | 11.8 (n=12)     | 13.4 (n=891) | 17.0 (n=9)      | 15.7 (n=1260) |

In the multivariate regression analysis (Table 4), macrosomia and instrumental delivery significantly increased the OASIS risk for multiparous women in the first time period, but not in the second. In the second time period, none of the identified OASIS risk factors were significant for multiparous women. However, OASIS cases were few (n=53) in this subgroup of women. In the multivariate analysis the effect of episiotomy was non-significant in both time periods (Table 4). However, multiparous women with episiotomy were very few in this study and interpretation of the results should be undertaken cautiously (Table 2 and 5).

## Discussion

In this study, comprising 31 709 vaginal deliveries, the OASIS incidence was reduced by 50% after introduction of a perineal protection training program during the second stage of delivery, aimed at reducing incidence of OASIS. The reduction in the OASIS incidence was similar in all subgroups defined by OASIS risk factors.

### Strength and weaknesses of the study

Strength of this hospital-based large observational study includes a very low risk of diagnostic misclassification of the OASIS outcome as all OASIS diagnoses were validated for study purposes. This is in contrast to studies based on registries that are not primarily created for

1  
2  
3 research, but are established for other purposes for the health care providers. In our study, the  
4  
5 medical records of all patients registered with an OASIS were carefully reviewed by one  
6  
7 senior consultant (KL). In addition, OASIS cases were collected from all available sources  
8  
9 (delivery unit protocols and hospital discharge lists, including ICD-10 codes and any codes  
10  
11 for OASIS repair) for the study years. Another strength is that the study was carried out at in a  
12  
13 single large hospital focusing on improved quality of primary diagnosis and repair of OASIS,  
14  
15 and this reduces the risk of variations in clinical diagnosis and repair of OASIS. Strength of  
16  
17 the study is also the unselected population of delivering women and a large number of  
18  
19 deliveries.  
20  
21

22  
23 A weakness of our study is that the use of perineum support method, if used during  
24  
25 second stage of delivery, was not registered in the medical records, and therefore, use of  
26  
27 perineum support could not be assessed directly in our retrospective study. However, if this  
28  
29 method was not used in some deliveries during the second time period or was used in some  
30  
31 deliveries during the first time period, our study would tend to underestimate the OASIS  
32  
33 incidence reducing effect of the perineum protection intervention program, and hence, our  
34  
35 efficacy estimates on reduction of OASIS from the intervention are minimum estimates.  
36  
37  
38  
39

#### 40 **Meaning of the study**

41  
42 The observed reduction in OASIS came rapidly after the introduction of the perineal support  
43  
44 programme and the low OASIS incidence has lasted over the last years. The changes in  
45  
46 clinical characteristics of the study population were very modest between the two time  
47  
48 periods, and cannot explain the rapid reduction in the OASIS incidence. Without the  
49  
50 intervention programme, we could have expected an increase in the OASIS incidence in the  
51  
52 second time period, as one of the most important OASIS risk factors, instrumental delivery,  
53  
54 became more frequent in the study population (Table 1) over the study years. In our study the  
55  
56  
57  
58  
59  
60

1  
2  
3 reduction of OASIS was surprisingly consistent in all subgroups defined by OASIS risk  
4  
5 factors (Table 2). The decrease in OASIS incidence was similar in spontaneous and operative  
6  
7 deliveries and in both parity groups (primiparous and multiparous), again surprising, as  
8  
9 primiparity is one of the most important risk factors for OASIS, as is operative delivery,[5,  
10  
11 10, 15]. Interestingly, as shown in Figure 1, the 2010 OASIS incidence in women delivered  
12  
13 by ventouse delivery is of similar low magnitude as the OASIS incidence in the spontaneous  
14  
15 deliveries was back in 2005 (3.6 and 3.8%, respectively).  
16  
17

18  
19 Underreporting OASIS cases in the second time period is an unlikely cause for the  
20  
21 registered reduction of OASIS incidence, as the procedure emphasizing more than one  
22  
23 accoucheur present at all deliveries was introduced before the second study period in form of  
24  
25 a written procedure. Caesarean rate was unaltered between the two study periods and cannot  
26  
27 explain the reduction of OASIS incidence.  
28  
29

### 30 31 **Comparison with other studies**

32  
33 Traditionally, there has been a focus on OASIS risk factors with high OR. However, such risk  
34  
35 factors may not necessarily represent the most frequent events in a delivery unit. Shoulder  
36  
37 dystocia and occiput posterior presentation are examples of risk factors with high OR and a  
38  
39 very low incidence,[5, 15]. In numbers, most of the OASIS occurs during deliveries with low  
40  
41 risk; during spontaneous deliveries with an infant of normal size. In our study, the number of  
42  
43 women with OASIS illustrates the major groups of women that will suffer this obstetric  
44  
45 complication; of the 752 primiparous women with OASIS in our study, 488 delivered  
46  
47 spontaneously, only 21 after shoulder dystocia, 39 from an infant in occiput posterior  
48  
49 presentation. In total 77% (580/752) of the primiparous women with OASIS delivered an  
50  
51 infant that was not macrosomic (>4000g). Actually, 38% of the women with OASIS delivered  
52  
53 an infant smaller than the mean infant birth weight (3500 g) in our study population.  
54  
55  
56  
57  
58  
59  
60

1  
2  
3 A randomized controlled trial (RCT) would be the optimal design for evaluating the  
4 OASIS reducing effect of manual perineum protection, but carrying out such an RCT is  
5 challenging during delivery, due to contamination of methods in different study arms and  
6 problems with blinding of patients or staff. Previous RCTs have not shown a beneficial effect  
7 on OASIS by hands-on perineal protection, but the published RCTs have not described a  
8 structured training of the staff, such as the intervention programme of our study,[22]. These  
9 trials had problems with bias caused by contamination of compared methods and different use  
10 of medial episiotomy in the study arms,[23, 24], were under-powered to explore OASIS, or  
11 were not designed to assess OASIS, but perineal pain or perineal injury in general (including  
12 1<sup>st</sup> and 2<sup>nd</sup> degree tears and episiotomy),[23-25]. The marked 50% reduction in the OASIS  
13 incidence obtained in our delivery unit appeared simultaneously with the introduction of a  
14 manual perineal protection during second stage of labour. Thus, as the main difference for our  
15 study population between the two time periods was a perineum protection training  
16 programme, we conclude that it is most likely that such a perineal protection programme has a  
17 beneficial effect in reducing the OASIS incidence, both for primiparous and multiparous  
18 women, despite the lack of an RCT supporting this conclusion. Previous studies describe  
19 OASIS risk factors following an increased incidence of this obstetrical complication,[1, 5, 10,  
20 11, 15], and we are not aware of any other study exploring the reduced OASIS incidence by  
21 different risk factor groups.  
22  
23  
24  
25  
26  
27  
28  
29  
30  
31  
32  
33  
34  
35  
36  
37  
38  
39  
40  
41  
42  
43  
44

45 Use of episiotomy was registered in our study, but type of episiotomy was not  
46 registered, and improvement of performed episiotomy technique in order to avoid median cuts  
47 was a part of the training package at our delivery unit. Medial and close to medial  
48 episiotomies have a higher risk for OASIS,[21]. Large register studies show that mediolateral  
49 and lateral episiotomies have a protecting effect against OASIS, particularly among  
50 primiparous women and in instrumental deliveries,[9, 10, 26-28]. During the study period, the  
51  
52  
53  
54  
55  
56  
57  
58  
59  
60

1  
2  
3 use of episiotomy in our hospital decreased slightly in spontaneous deliveries in primiparous  
4  
5 women (from 24.7 to 22.7%), but increased in instrumental deliveries in primiparous women  
6  
7 (from 60.8 to 85.1%) (Table 1), and was shown to be a protective factor against OASIS for  
8  
9 primiparous women in both time periods (Table 4). Since episiotomy was used only when  
10  
11 indicated, we assume that our staff managed to select the truly high risk patients in need for  
12  
13 episiotomy to reduce the risk of OASIS. Differences in effect of episiotomy between different  
14  
15 parity groups on OASIS occurrence can be explained by indication bias, a mix between cause  
16  
17 and effect, as episiotomy is used in deliveries with high OASIS risk. Multiparous women  
18  
19 needing episiotomy may represent a group of women with difficult delivery with many risk  
20  
21 factors.  
22  
23  
24  
25  
26

### 27 **Research and policy implications**

28  
29 We expected a more notable reduction of the OASIS incidences in the subgroups with lower  
30  
31 risk (low or normal infant birth weight), as compared to women with higher risk (large  
32  
33 infant), if the perineal support program had been followed consistently in all deliveries. We  
34  
35 believe that a non-consistent use of perineum support in deliveries with lower risk for OASIS  
36  
37 could account for the results; the main clinical focus was on women with high risk for OASIS,  
38  
39 based on publications focusing on such risk factors. It is well known that clinicians' working  
40  
41 methods can be difficult to change,[29-31] and there was a low enthusiasm for a routinely  
42  
43 performed perineal support (used in all deliveries, regardless of risk group) among the  
44  
45 midwifery staff when the training program was introduced. Despite the promising 50%  
46  
47 reduction of OASIS incidence over the last years, the hospital currently aims at further  
48  
49 reducing the OASIS incidence. We have registered improved compliance to the perineum  
50  
51 support programme among the staff over the last years, probably due to the promising OASIS  
52  
53 results after implementation of the perineum support programme. The training programme for  
54  
55  
56  
57  
58  
59  
60

1  
2  
3 perineal protection is a low-cost intervention requiring no extra resources or equipment, only  
4  
5 training of the existing staff. Such perineum protection programmes are previously  
6  
7 implemented in five hospitals in Norway,[17, 18], therefore we can conclude that the  
8  
9 programme is easily generalisable and applicable to other settings than ours.  
10

## 11 12 13 **Conclusions**

14  
15 Our observational study shows a large and rapid reduction in OASIS incidence following an  
16  
17 introduction of a perineum support programme, across all risk groups of OASIS. We suggest  
18  
19 that future OASIS research should focus more on variables connected to delivery procedures,  
20  
21 including perineal protection procedures during delivery, and not restricting risk analyses to  
22  
23 demographic and individual obstetric data of the delivering woman or the infant. Using  
24  
25 manual perineal protection is a low-cost intervention with no identified side effects and  
26  
27 requires no extra resources or equipment, except for training of the existing personnel.  
28  
29 Attempts to create methods to predict OASIS on individual level have not been  
30  
31 successful,[32-34] and we suggest that obstetrical interventions aiming at reducing the  
32  
33 incidence of OASIS should be offered to all delivering women, not only to women in high  
34  
35 risk groups.  
36  
37  
38  
39  
40  
41  
42

## 43 **REFERENCES**

- 44  
45  
46 1. Räisänen S, Vehviläinen-Julkunen K, Gissler M, Heinonen S. Up to seven-fold inter-  
47  
48 hospital differences in obstetric anal sphincter injury rates- A birth register-based study in  
49  
50 Finland. *BMC Res Notes* 2010;**3**:345.  
51  
52  
53  
54 2. Laine K, Gissler M, Pirhonen J. Changing incidence of anal sphincter tears in four Nordic  
55  
56 countries through the last decades. *Eur J Obstet Gynecol Reprod Biol* 2009;**146**:71-5.  
57  
58  
59  
60

- 1  
2  
3 3. Pirhonen JP, Grenman SE, Haadem K, et al. Frequency of anal sphincter rupture at delivery  
4  
5 in Sweden and Finland--result of difference in manual help to the baby's head. *Acta*  
6  
7 *Obstet Gynecol Scand* 1998;**77**:974-7.  
8  
9
- 10  
11 4. Prager M, Andersson KL, Stephansson O, Marchionni M, Marions L. The incidence of  
12  
13 obstetric anal sphincter rupture in primiparous women: a comparison between two  
14  
15 European delivery settings. *Acta Obstet Gynecol Scand* 2008;**87**:209-15.  
16  
17
- 18  
19 5. Baghestan E, Irgens LM, Bordahl PE, Rasmussen S. Trends in risk factors for obstetric anal  
20  
21 sphincter injuries in Norway. *Obstet Gynecol* 2010;**116**:25-34.  
22  
23
- 24  
25 6. Laine K, Skjeldestad FE, Sanda B, Horne H, Spydslaug A, Staff AC. Prevalence and risk  
26  
27 factors for anal incontinence after obstetric anal sphincter rupture. *Acta Obstet Gynecol*  
28  
29 *Scand* 2011;**90**:319-24.  
30  
31
- 32  
33 7. Bols EM, Hendriks EJ, Berghmans BC, Baeten CG, Nijhuis JG, de Bie RA. A systematic  
34  
35 review of etiological factors for postpartum fecal incontinence. *Acta Obstet Gynecol*  
36  
37 *Scand* 2010;**89**:302-14.  
38  
39
- 40  
41 8. Norderval S, Nsubuga D, Bjelke C, Frasunek J, Myklebust I, Vonen B. Anal incontinence  
42  
43 after obstetric sphincter tears: incidence in a Norwegian county. *Acta Obstet Gynecol*  
44  
45 *Scand* 2004;**83**:989-94.  
46  
47
- 48  
49 9. de Leeuw JW, de Wit C, Kuijken JP, Bruinse HW. Mediolateral episiotomy reduces the  
50  
51 risk for anal sphincter injury during operative vaginal delivery. *BJOG* 2008;**115**:104-8.  
52  
53  
54
- 55  
56 10. Räsänen SH, Vehviläinen-Julkunen K, Gissler M, Heinonen S. Lateral episiotomy  
57  
58 protects primiparous but not multiparous women from obstetric anal sphincter rupture.  
59  
60

- 1  
2  
3 *Acta Obstet Gynecol Scand* 2009;**88**:1365-72.  
4  
5  
6  
7 11. Räisänen S, Vehviläinen-Julkunen K, Gissler M, Heinonen S. High episiotomy rate  
8 protects from obstetric anal sphincter ruptures: A birth register-study on delivery  
9 intervention policies in Finland. *Scand J Public Health* 2011;**39**:457-63.  
10  
11  
12  
13  
14 12. Dahl C, Kjolhede P. Obstetric anal sphincter rupture in older primiparous women: a case-  
15 control study. *Acta Obstet Gynecol Scand* 2006;**85**:1252-8.  
16  
17  
18  
19  
20  
21 13. Bowling CB, Wheeler II TL, Gerten KA, Chapman VR, Burgio KL, Richter HE.  
22 Sphincter tears in primiparous women: is age a factor?. *Int Urogynecol J Pelvic Floor*  
23 *Dysfunct* 2008;**179**:600-4.  
24  
25  
26  
27  
28  
29 14. Gerdin E, Sverrisdottir G, Badi A, Carlsson B, Graf W. The role of maternal age and  
30 episiotomy in the risk of anal sphincter tears during childbirth. *Aust N Z J Obstet*  
31 *Gynaecol* 2007;**47**:286-90.  
32  
33  
34  
35  
36  
37 15. Räisänen S, Vehviläinen-Julkunen K, Gissler M, Heinonen S. The increased incidence of  
38 obstetric anal sphincter rupture--an emerging trend in Finland. *Prev Med* 2009;**49**:535-40.  
39  
40  
41  
42  
43 16. Ekeus C, Nilsson E, Gottvall K. Increasing incidence of anal sphincter tears among  
44 primiparas in Sweden: a population-based register study. *Acta Obstet Gynecol Scand*  
45 2008;**87**:564-73.  
46  
47  
48  
49  
50  
51 17. Laine K, Pirhonen T, Rolland R, Pirhonen J. Decreasing the incidence of anal sphincter  
52 tears during delivery. *Obstet Gynecol* 2008;**111**:1053-7.  
53  
54  
55  
56  
57 18. Hals E, Oian P, Pirhonen T, et al. A multicenter interventional program to reduce the  
58  
59  
60



- 1  
2  
3 incidence of anal sphincter tears. *Obstet Gynecol* 2010;**116**:901-8.  
4  
5  
6  
7 19. Hirsch E, Haney EI, Gordon TE, Silver RK. Reducing high-order perineal laceration  
8 during operative vaginal delivery. *Am J Obstet Gynecol* 2008;**198**:668.e1-5.  
9  
10  
11  
12  
13 20. Roos AM, Thakar R, Sultan AH. Outcome of primary repair of obstetric anal sphincter  
14 injuries (OASIS): does the grade of tear matter? *Ultrasound Obstet Gynecol*  
15  
16 2010;**36**:368-74.  
17  
18  
19  
20  
21 21. Coats PM, Chan KK, Wilkins M, Beard RJ. A comparison between midline and  
22  
23 mediolateral episiotomies. *Br J Obstet Gynaecol* 1980;**87**:408-12.  
24  
25  
26  
27 22. Jönsson ER, Elfaghi I, Rydhström H, Herbst A. Modified Ritgen's maneuver for anal  
28  
29 sphincter injury at delivery: a randomized controlled trial. *Obstet Gynecol* 2008;**112**:212-  
30  
31 7.  
32  
33  
34  
35 23. McCandlish R, Bowler U, van Asten H, et al. A randomised controlled trial of care of the  
36  
37 perineum during second stage of normal labour. *Br J Obstet Gynaecol* 1998;**105**:1262-72.  
38  
39  
40  
41 24. Mayerhofer K, Bodner-Adler B, Bodner K, et al. Traditional care of the perineum during  
42  
43 birth. A prospective, randomized, multicenter study of 1,076 women. *J Reprod Med*  
44  
45 2002;**47**:477-82.  
46  
47  
48  
49 25. Albers LL, Sedler KD, Bedrick EJ, Teaf D, Peralta P. Midwifery care measures in the  
50  
51 second stage of labor and reduction of genital tract trauma at birth: a randomized trial. *J*  
52  
53 *Midwifery Womens Health* 2005;**50**:365-72.  
54  
55  
56  
57 26. de Leeuw JW, Struijk PC, Vierhout ME, Wallenburg HC. Risk factors for third degree  
58  
59  
60

- 1  
2  
3 perineal ruptures during delivery. *BJOG* 2001;**108**:383-7.  
4  
5  
6  
7 27. Räisänen S, Vehviläinen-Julkunen K, Gissler M, Heinonen S. Hospital-based lateral  
8 episiotomy and obstetric anal sphincter injury rates: a retrospective population-based  
9 register study. *Am J Obstet Gynecol* 2012;**206**:347.e1,347.e6.  
10  
11  
12  
13  
14 28. Zafran N, Salim R. Impact of liberal use of mediolateral episiotomy on the incidence of  
15 obstetric anal sphincter tear. *Arch Gynecol Obstet* 2012:[Epub ahead of print].  
16  
17  
18  
19  
20 29. Klein MC, Kaczorowski J, Robbins JM, Gauthier RJ, Jorgensen SH, Joshi AK.  
21 Physicians' beliefs and behaviour during a randomized controlled trial of episiotomy:  
22 consequences for women in their care. *CMAJ* 1995;**153**:769-79.  
23  
24  
25  
26  
27  
28 30. Schulz KF. Unbiased research and the human spirit: the challenges of randomized  
29 controlled trials. *CMAJ* 1995;**153**:783-6.  
30  
31  
32  
33  
34 31. Pirhonen T, Gissler M, Hartgill T, Pirhonen J. Experiences of expert midwives in a  
35 training program aimed at decreasing perineal tears. *International Journal of Nursing and*  
36 *Midwifery* 2011;**3**:70-75.  
37  
38  
39  
40  
41  
42 32. Williams A, Tincello DG, White S, Adams EJ, Alfirevic Z, Richmond DH. Risk scoring  
43 system for prediction of obstetric anal sphincter injury. *BJOG* 2005;**112**:1066-9.  
44  
45  
46  
47  
48 33. Harkin R, Fitzpatrick M, O'Connell PR, O'Herlihy C. Anal sphincter disruption at vaginal  
49 delivery: is recurrence predictable? *Eur J Obstet Gynecol Reprod Biol* 2003;**109**:149-52.  
50  
51  
52  
53  
54 34. Varma A, Gunn J, Lindow SW, Duthie GS. Do routinely measured delivery variables  
55 predict anal sphincter outcome? *Dis Colon Rectum* 1999;**42**:1261-4.  
56  
57  
58  
59  
60

1  
2  
3  
4  
5  
6  
7  
8  
9  
10  
11  
12  
13  
14  
15  
16  
17  
18  
19  
20  
21  
22  
23  
24  
25  
26  
27  
28  
29  
30  
31  
32  
33  
34  
35  
36  
37  
38  
39  
40  
41  
42  
43  
44  
45  
46  
47  
48  
49  
50  
51  
52  
53  
54  
55  
56  
57  
58  
59  
60

For peer review only

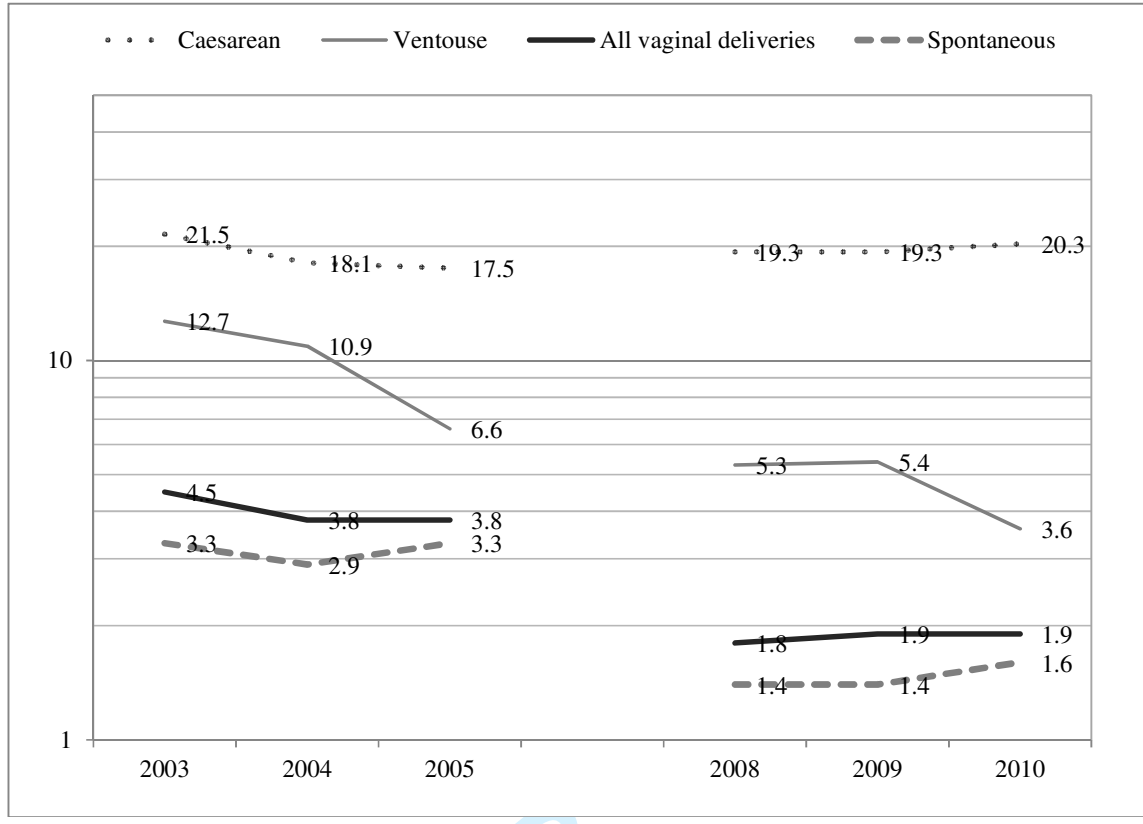

Figure 1. Frequency of OASIS (%) for different delivery methods during the study years. Frequencies of caesareans are also indicated.

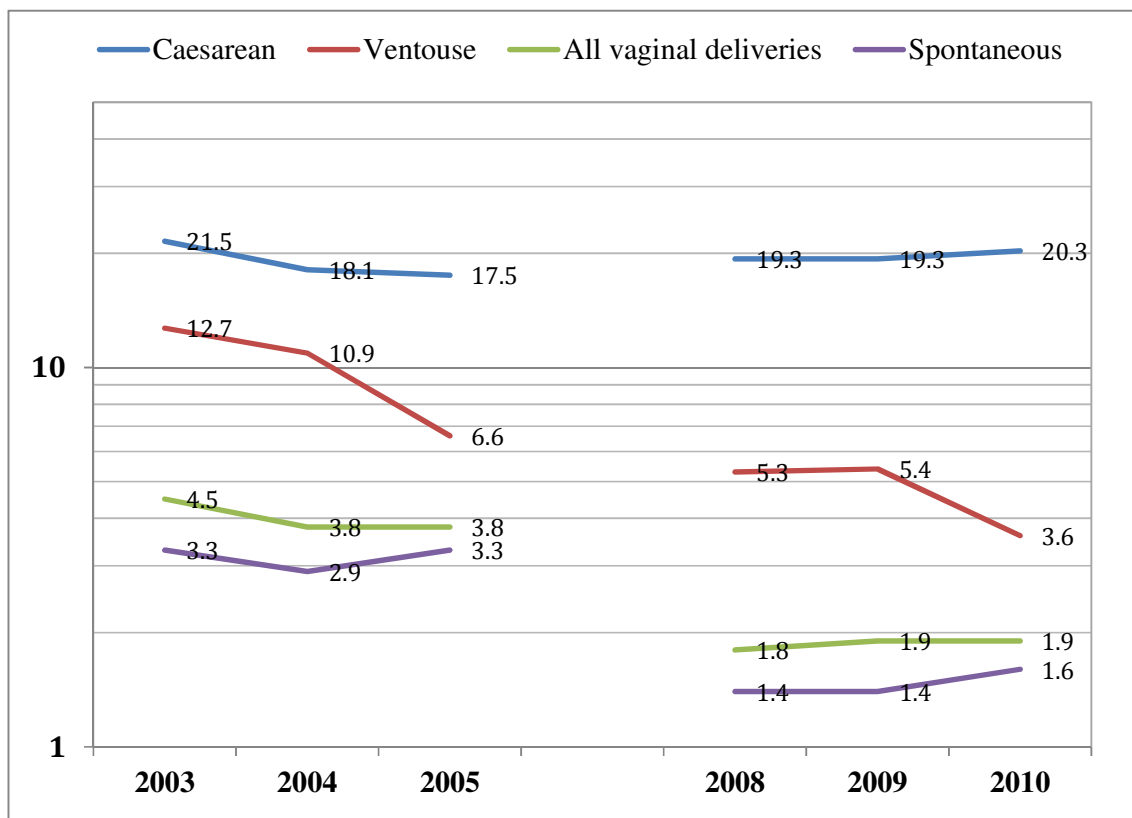

Figure 1 Frequency of OASIS (%) for different delivery methods during the study years. Frequencies of caesareans are also indicated.

## STROBE Statement—checklist of items that should be included in reports of observational studies

|                              | Item No | Recommendation                                                                                                                                                                                                                                                                                                                                                                                                                                                                                                                                                                                                                                                                                   |
|------------------------------|---------|--------------------------------------------------------------------------------------------------------------------------------------------------------------------------------------------------------------------------------------------------------------------------------------------------------------------------------------------------------------------------------------------------------------------------------------------------------------------------------------------------------------------------------------------------------------------------------------------------------------------------------------------------------------------------------------------------|
| <b>Title and abstract</b>    | 1 ok    | (a) Indicate the study's design with a commonly used term in the title or the abstract<br>(b) Provide in the abstract an informative and balanced summary of what was done and what was found                                                                                                                                                                                                                                                                                                                                                                                                                                                                                                    |
| <b>Introduction</b>          |         |                                                                                                                                                                                                                                                                                                                                                                                                                                                                                                                                                                                                                                                                                                  |
| Background/rationale         | 2 ok    | Explain the scientific background and rationale for the investigation being reported                                                                                                                                                                                                                                                                                                                                                                                                                                                                                                                                                                                                             |
| Objectives                   | 3 ok    | State specific objectives, including any prespecified hypotheses                                                                                                                                                                                                                                                                                                                                                                                                                                                                                                                                                                                                                                 |
| <b>Methods</b>               |         |                                                                                                                                                                                                                                                                                                                                                                                                                                                                                                                                                                                                                                                                                                  |
| Study design                 | 4 ok    | Present key elements of study design early in the paper                                                                                                                                                                                                                                                                                                                                                                                                                                                                                                                                                                                                                                          |
| Setting                      | 5 ok    | Describe the setting, locations, and relevant dates, including periods of recruitment, exposure, follow-up, and data collection                                                                                                                                                                                                                                                                                                                                                                                                                                                                                                                                                                  |
| Participants                 | 6 ok    | (a) <i>Cohort study</i> —Give the eligibility criteria, and the sources and methods of selection of participants. Describe methods of follow-up<br><i>Case-control study</i> —Give the eligibility criteria, and the sources and methods of case ascertainment and control selection. Give the rationale for the choice of cases and controls<br><i>Cross-sectional study</i> —Give the eligibility criteria, and the sources and methods of selection of participants<br>(b) <i>Cohort study</i> —For matched studies, give matching criteria and number of exposed and unexposed<br><i>Case-control study</i> —For matched studies, give matching criteria and the number of controls per case |
| Variables                    | 7 ok    | Clearly define all outcomes, exposures, predictors, potential confounders, and effect modifiers. Give diagnostic criteria, if applicable                                                                                                                                                                                                                                                                                                                                                                                                                                                                                                                                                         |
| Data sources/<br>measurement | 8*ok    | For each variable of interest, give sources of data and details of methods of assessment (measurement). Describe comparability of assessment methods if there is more than one group                                                                                                                                                                                                                                                                                                                                                                                                                                                                                                             |
| Bias                         | 9 ok    | Describe any efforts to address potential sources of bias                                                                                                                                                                                                                                                                                                                                                                                                                                                                                                                                                                                                                                        |
| Study size                   | 10 ok   | Explain how the study size was arrived at                                                                                                                                                                                                                                                                                                                                                                                                                                                                                                                                                                                                                                                        |
| Quantitative variables       | 11 ok   | Explain how quantitative variables were handled in the analyses. If applicable, describe which groupings were chosen and why                                                                                                                                                                                                                                                                                                                                                                                                                                                                                                                                                                     |
| Statistical methods          | 12 ok   | (a) Describe all statistical methods, including those used to control for confounding<br>(b) Describe any methods used to examine subgroups and interactions<br>(c) Explain how missing data were addressed<br>(d) <i>Cohort study</i> —If applicable, explain how loss to follow-up was addressed<br><i>Case-control study</i> —If applicable, explain how matching of cases and controls was addressed<br><i>Cross-sectional study</i> —If applicable, describe analytical methods taking account of sampling strategy<br>(e) Describe any sensitivity analyses                                                                                                                                |

Continued on next page

**Results**

|                  |       |                                                                                                                                                                                                                                                                                                                                                                                                               |
|------------------|-------|---------------------------------------------------------------------------------------------------------------------------------------------------------------------------------------------------------------------------------------------------------------------------------------------------------------------------------------------------------------------------------------------------------------|
| Participants     | 13*ok | (a) Report numbers of individuals at each stage of study—eg numbers potentially eligible, examined for eligibility, confirmed eligible, included in the study, completing follow-up, and analysed<br>(b) Give reasons for non-participation at each stage<br>(c) Consider use of a flow diagram                                                                                                               |
| Descriptive data | 14*ok | (a) Give characteristics of study participants (eg demographic, clinical, social) and information on exposures and potential confounders<br>(b) Indicate number of participants with missing data for each variable of interest<br>(c) <i>Cohort study</i> —Summarise follow-up time (eg, average and total amount)                                                                                           |
| Outcome data     | 15*ok | <i>Cohort study</i> —Report numbers of outcome events or summary measures over time<br><i>Case-control study</i> —Report numbers in each exposure category, or summary measures of exposure<br><i>Cross-sectional study</i> —Report numbers of outcome events or summary measures                                                                                                                             |
| Main results     | 16ok  | (a) Give unadjusted estimates and, if applicable, confounder-adjusted estimates and their precision (eg, 95% confidence interval). Make clear which confounders were adjusted for and why they were included<br>(b) Report category boundaries when continuous variables were categorized<br>(c) If relevant, consider translating estimates of relative risk into absolute risk for a meaningful time period |
| Other analyses   | 17ok  | Report other analyses done—eg analyses of subgroups and interactions, and sensitivity analyses                                                                                                                                                                                                                                                                                                                |

**Discussion**

|                  |       |                                                                                                                                                                            |
|------------------|-------|----------------------------------------------------------------------------------------------------------------------------------------------------------------------------|
| Key results      | 18ok  | Summarise key results with reference to study objectives                                                                                                                   |
| Limitations      | 19 ok | Discuss limitations of the study, taking into account sources of potential bias or imprecision. Discuss both direction and magnitude of any potential bias                 |
| Interpretation   | 20 ok | Give a cautious overall interpretation of results considering objectives, limitations, multiplicity of analyses, results from similar studies, and other relevant evidence |
| Generalisability | 21 ok | Discuss the generalisability (external validity) of the study results                                                                                                      |

**Other information**

|         |       |                                                                                                                                                               |
|---------|-------|---------------------------------------------------------------------------------------------------------------------------------------------------------------|
| Funding | 22 ok | Give the source of funding and the role of the funders for the present study and, if applicable, for the original study on which the present article is based |
|---------|-------|---------------------------------------------------------------------------------------------------------------------------------------------------------------|

\*Give information separately for cases and controls in case-control studies and, if applicable, for exposed and unexposed groups in cohort and cross-sectional studies.

**Note:** An Explanation and Elaboration article discusses each checklist item and gives methodological background and published examples of transparent reporting. The STROBE checklist is best used in conjunction with this article (freely available on the Web sites of PLoS Medicine at <http://www.plosmedicine.org/>, Annals of Internal Medicine at <http://www.annals.org/>, and Epidemiology at <http://www.epidem.com/>). Information on the STROBE Initiative is available at [www.strobe-statement.org](http://www.strobe-statement.org).



**Incidence of obstetric anal sphincter injuries after training to protect the perineum: cohort study**

|                                 |                                                                                                                                                                                                                                                                                                                                                                                                                                     |
|---------------------------------|-------------------------------------------------------------------------------------------------------------------------------------------------------------------------------------------------------------------------------------------------------------------------------------------------------------------------------------------------------------------------------------------------------------------------------------|
| Journal:                        | <i>BMJ Open</i>                                                                                                                                                                                                                                                                                                                                                                                                                     |
| Manuscript ID:                  | bmjopen-2012-001649.R1                                                                                                                                                                                                                                                                                                                                                                                                              |
| Article Type:                   | Research                                                                                                                                                                                                                                                                                                                                                                                                                            |
| Date Submitted by the Author:   | 18-Aug-2012                                                                                                                                                                                                                                                                                                                                                                                                                         |
| Complete List of Authors:       | Laine, Katariina; Oslo University Hospital, Department of Obstetricsf; University of Oslo, Skjeldestad, Finn Egil; Women's Health and Perinatology Research Group, University of Tromsø, Norway, Department of Clinical Medicine Sandvik, Leiv; Oslo University Hospital, Oslo, Norway, Unit of Biostatistics and Epidemiology Staff, Annetine; Oslo University Hospital, Dept of Obstetrics and Dept of Gynaecology, Oslo, Norway, |
| <b>Primary Subject Heading</b>: | Reproductive medicine, obstetrics and gynaecology                                                                                                                                                                                                                                                                                                                                                                                   |
| Secondary Subject Heading:      | Reproductive medicine, obstetrics and gynaecology                                                                                                                                                                                                                                                                                                                                                                                   |
| Keywords:                       | Maternal medicine < OBSTETRICS, Urogynaecology < GYNAECOLOGY, EDUCATION & TRAINING (see Medical Education & Training), MEDICAL EDUCATION & TRAINING, obstetric anal sphincter injury, delivery                                                                                                                                                                                                                                      |
|                                 |                                                                                                                                                                                                                                                                                                                                                                                                                                     |

SCHOLARONE™  
Manuscripts

Only



## Abstract

**Objective** To compare the incidence of obstetric anal sphincter injuries (OASIS) in two time periods, before and after implementing a training programme for improved perineal support aimed at reducing the incidence of obstetric anal sphincter injuries. The secondary aim was to study incidence of obstetric anal sphincter injuries in subgroups defined by risk factors for OASIS.

**Design** Population based cohort study.

**Setting** University hospital setting in Oslo, Norway.

**Participants** Two cohorts of all delivering women in the largest hospital in Norway during two time periods (2003-2005 and 2008-2010) were studied. After excluding caesarean sections and preterm deliveries (< week 32), the study population consisted of 31 709 deliveries, among which 907 women were identified with obstetric anal sphincter injury.

**Primary and secondary outcome measures** Incidence of OASIS in two time periods. Maternal, obstetrical and fetal risk factors for OASIS was collected from the hospital obstetric database. Univariate analyses and multivariate logistic regression analyses, presenting adjusted odds ratios for OASIS, were performed.

**Results** The OASIS incidence was significantly reduced by 50%, from 4.0% (591/14787) in the first time period to 1.9% (316/16922) in the second. This reduction could not be explained by changes in population characteristics or OASIS risk factors during the study years. The reduction of incidence of OASIS between the two study periods was consistent across subgroups of women; regardless of parity, delivery method and infant birth weight.

**Conclusion** A marked reduction in the incidence of OASIS was observed in all studied subgroups of women after implementing the training programme for perineal protection. Further, this reduction could not be explained by the differences in patient characteristics across the study period. These findings indicate that the training programme with improved perineal protection markedly reduced the risk of OASIS.

## Introduction

Obstetric anal sphincter injury is a serious maternal complication during a vaginal delivery with reported incidences varying from 1 to 6% ,[1-5], and occurs even in otherwise uncomplicated deliveries. Obstetric anal sphincter injuries (OASIS) may cause pain, discomfort and anal incontinence (AI) ,[6-8].

Risk factors for OASIS have been widely studied, with several hundred studies presently available in PubMed, assessing maternal, obstetric and fetal risk factors. Numerous factors have been investigated and focus has often been on factors that are not modifiable, such as maternal age, height, weight, ethnicity, fetal weight and head size. Most previous studies conclude that primiparity, large infant birth weight and instrumental delivery increase

1  
2  
3 the risk of OASIS, but when exploring factors such as maternal age (young or advanced),  
4  
5 ethnicity, epidural use and episiotomy, the results are conflicting ,[9-14]. Risk factors  
6  
7 unrelated to the delivering woman or the infant size, such as the accoucheurs' management of  
8  
9 the second stage of delivery, have been less investigated.  
10

11  
12 The incidence of OASIS varies between countries and delivery units ,[2-5, 15]. A  
13  
14 steadily increasing incidence of OASIS has been reported in the Nordic countries over the last  
15  
16 decades ,[2, 5, 15, 16], albeit still at a very low rate in Finland ,[2]. Factors such as alterations  
17  
18 in patient population over time (increasing maternal age, larger infants and increased use of  
19  
20 instrumental delivery) have been studied, but such factors cannot alone explain the increasing  
21  
22 incidence of OASIS ,[5, 15].  
23

24  
25 In 2004 the Norwegian National Board of Health criticized the delivery units for a  
26  
27 high incidence of OASIS, at that time being 4.5% of vaginal deliveries, and required that  
28  
29 hospitals should implement programs to reduce the OASIS incidence. Programs to introduce  
30  
31 manual perineal protection in the second stage of delivery were implemented in many  
32  
33 Norwegian hospitals, and a reduction in OASIS incidence was achieved ,[17, 18]. In the  
34  
35 Obstetric Department at Oslo University Hospital, Ullevål, attempts to reduce the incidence of  
36  
37 OASIS were developed in steps, starting in 2006 with more focus on the OASIS issue in  
38  
39 clinical meetings, whereas practical training to improve protection of perineum during second  
40  
41 stage of delivery started in 2008. Such training programmes have previously been described  
42  
43 in two studies ,[17, 18].  
44  
45

46  
47 The primary aim of the present study was to compare the incidence of OASIS across  
48  
49 two time periods, before and after implementing a training program for perineal protection  
50  
51 during second stage of delivery, aimed at reducing the incidence of OASIS. A secondary aim  
52  
53 was to study the incidence of OASIS in subgroups of women defined by risk factors.  
54  
55

## 56 57 **Methods** 58 59 60

1  
2  
3 The study was conducted as a retrospective cohort study, in the largest delivery unit in  
4 Norway, at a university hospital with an unselected patient population in Oslo, with 7000  
5 deliveries annually. Two cohorts from two time periods were studied, 2003-2005 and 2008-  
6 2010, before and after the intervention of a training program for manual perineal protection  
7 during the second stage of delivery.  
8  
9  
10  
11  
12

### 13 14 15 16 17 **Databases and participants**

18 Data was obtained from the hospital obstetric database, the electronic hospital discharge  
19 register, individual electronic and paper-based medical records, and from the manually  
20 assembled labour protocols at the delivery unit, during the time period from 2003 to 2010.  
21  
22  
23

24 Two cohorts were chosen to the study, 2003-2005 and 2008-2010.  
25  
26

27  
28 Women with obstetric anal sphincter injuries were identified from the labour protocols  
29 at the delivery unit and validated against individual electronic and paper-based medical charts  
30 (by the first author: KL). Surgery notes for the perineum repair in the medical record for each  
31 case were carefully read, and false positive cases were excluded (n=22). In addition, patients  
32 with the diagnosis OASIS (ICD-10 code O70.2 or O70.3) were identified from the electronic  
33 hospital discharge register and 13 additional patients with OASIS were identified. After  
34 excluding women delivered with caesarean section, preterm deliveries (< week 32), triplets  
35 and quadruplets, the study population comprised 31 709 deliveries, of which 907 women with  
36 OASIS.  
37  
38  
39  
40  
41  
42  
43  
44  
45  
46  
47  
48  
49

### 50 **Definition and diagnostics of OASIS**

51  
52 Obstetric anal sphincter injury was defined as any degree of injury in the anal sphincter  
53 muscle (3A, 3B, 3C and 4<sup>th</sup> degree perineal tears, identified by the diagnoses O70.2 and  
54 O70.3 in the ICD-10 system) ,[19].  
55  
56  
57  
58  
59  
60

1  
2  
3 In Norway, spontaneous deliveries are attended by midwives whereas instrumental  
4 deliveries are handled by physicians. To increase safety during delivery for both the mother  
5 and the infant, the procedure at our department requires at least two accoucheurs (two  
6 midwives or one midwife and a physician) attending the second and third stage of each  
7 delivery. If the midwife suspects OASIS, a physician attends the labour room and evaluates  
8 and classifies the degree of perineal tear. The written procedure of the department is that a  
9 standardized surgical OASIS repair (end-to-end technique) is always performed under direct  
10 surveillance of an experienced obstetrician or gynecologist (consultant).  
11  
12  
13  
14  
15  
16  
17  
18  
19  
20  
21  
22

### 23 **Risk factors for OASIS**

24 Information on maternal, obstetrical and fetal risk factors for OASIS was collected, including  
25 maternal age, parity, year of delivery, labour induction, delivery method, duration of second  
26 stage of labour, epidural use, episiotomy, persistent occiput posterior presentation, shoulder  
27 dystocia, infant birth weight and infant head circumference.  
28  
29  
30  
31  
32  
33  
34  
35

### 36 **The intervention programme**

37 The need to reduce the incidence of OASIS was discussed among delivery personnel in  
38 clinical meetings from 2006. An intervention programme was implemented from 2008,  
39 including both midwives and physicians at the Department of Obstetrics and Gynaecology.  
40 An external midwife was hired in from another hospital (where a similar programme was  
41 previously successfully implemented) to educate a group of trainer-midwives, who then  
42 further educated the entire midwife-staff. Physicians (both registrars and specialists) were  
43 educated in the perineal supporting technique and supervised by the first author (KL). First  
44 part of the training included a practical hands-on training on a pelvic delivery model and the  
45 second part included hands-on supervision in labour room during the second stage of delivery.  
46  
47  
48  
49  
50  
51  
52  
53  
54  
55  
56  
57  
58  
59  
60

The perineum protection programme consisted of four components during the last part of second stage of delivery, when the baby's head is crowning: slowing the delivery of the baby's head with one hand, supporting perineum with the other hand and squeezing with fingers (first and second) from the perineum lateral parts towards the middle in order to lower the pressure in middle posterior perineum, and asking the delivering woman not to push. The fourth part of the intervention was education in correct performing of episiotomy. At our department, episiotomy is performed only when indicated, for example due to fetal distress or imminent severe perineal tear. The main focus of this intervention step was to avoid median cuts of episiotomy technique, when performed, due to the augmented risk of OASIS associated with median episiotomies,[20].

### Comparison of groups

The clinical characteristics of the study participants in the first (2003-2005) and second (2008-2010) time period were compared in order to identify possible population differences of delivering women between the two time periods (Table 1).

Table 1 Clinical characteristics and obstetric interventions for the whole study population. Data are presented in frequencies (and numbers). *P*-values from Chi-square test.

| Time period          | Primiparous women |               | Multiparous women |               |
|----------------------|-------------------|---------------|-------------------|---------------|
|                      | 2003-05           | 2008-10       | 2003-05           | 2008-10       |
| n vaginal deliveries | n=8051            | n=8837        | n=6736            | n=8085        |
| <b>Risk factors</b>  |                   |               |                   |               |
| <b>Age, years</b>    | <i>P</i> <0.001   |               | <i>P</i> <0.001   |               |
| 15-29                | 48.3 (n=3885)     | 43.8 (n=3872) | 27.4 (n=1849)     | 21.4 (n=1730) |
| 30-34                | 39.3 (n=3164)     | 40.8 (n=3604) | 42 (n=2823)       | 40.7 (n=3287) |
| 35-51                | 12.4 (n=1002)     | 15.4 (n=1361) | 30.6 (n=2064)     | 37.9 (n=3068) |

|                                            |                 |               |                 |               |
|--------------------------------------------|-----------------|---------------|-----------------|---------------|
| <b>Birthweight, grams</b>                  | <i>P</i> =0.003 |               | <i>P</i> =0.60  |               |
| 720-2999                                   | 16.4 (n=1321)   | 16.4 (n=1446) | 11.8 (n=794)    | 11.6 (n=938)  |
| 3000-3499                                  | 37.9 (n=3050)   | 39.2 (n=3470) | 32.5 (n=2191)   | 32.0 (n=2591) |
| 3500-3999                                  | 33.2 (n=2670)   | 33.8 (n=2983) | 36.3 (n=2447)   | 37.5 (n=3029) |
| 4000-4499                                  | 11.0 (n=885)    | 9.3 (n=821)   | 15.6 (n=1049)   | 15.4 (n=1247) |
| 4500-5850                                  | 1.5 (n=125)     | 1.3 (n=117)   | 3.8 (n=255)     | 3.5 (n=280)   |
| <b>Delivery method</b>                     | <i>P</i> <0.001 |               | <i>P</i> =0.45  |               |
| Spontaneous                                | 81.5 (n=6558)   | 78.3 (n=6918) | 96.2 (n=6479)   | 96.4 (n=7793) |
| Ventouse                                   | 16.5 (n=1331)   | 20.4 (n=1802) | 3.5 (n=234)     | 3.4 (n=273)   |
| Forceps                                    | 2.0 (n=162)     | 1.3 (n=117)   | 0.3 (n=23)      | 0.2 (n=19)    |
| <b>Episiotomy, all vaginal deliveries</b>  | <i>P</i> <0.001 |               | <i>P</i> =0.066 |               |
|                                            | 31.4 (n=2528)   | 36.2 (n=3203) | 7.3 (n=492)     | 8.1 (n=656)   |
| <b>Episiotomy, spontaneous deliveries</b>  | <i>P</i> =0.006 |               | <i>P</i> =0.98  |               |
|                                            | 24.7 (n=1620)   | 22.7 (n=1569) | 6.1 (n=396)     | 6.1 (n=477)   |
| <b>Episiotomy, instrumental deliveries</b> | <i>P</i> <0.001 |               | <i>P</i> <0.001 |               |
|                                            | 60.8 (n=908)    | 85.1 (n=1634) | 37.4 (n=96)     | 61.3 (n=179)  |
| <b>Duration 2<sup>nd</sup> stage, min</b>  | <i>P</i> =0.057 |               | <i>P</i> =0.45  |               |
| 0-29                                       | 34.1 (n=2736)   | 32.5 (n=2864) | 84.9 (n=5696)   | 85.4 (n=6895) |
| 30-59                                      | 41.0 (n=3290)   | 41.6 (n=3673) | 12.5 (n=839)    | 11.9 (n=957)  |
| 60-205                                     | 24.9 (n=1994)   | 25.9 (n=2288) | 2.6 (n=174)     | 2.7 (n=219)   |

### Statistical analysis

Incidence of obstetric anal sphincter injuries was calculated from vaginal deliveries only and the data were stratified according to parity. Parity was adjusted to vaginal parity; women with one previous caesarean delivery only (never having delivered vaginally before) were categorized as “vaginal primiparous” (n=440).

The risk factors for OASIS were calculated and presented separately for the two cohorts. Continuous data were categorised and the independent variables are presented as frequencies. Univariate analysis was performed to explore the significant risk factors. Variables with  $P \leq 0.10$  were included in the multivariate analysis. Univariate analyses were performed by Chi-square test. A significance level of 5% was chosen in all analyses. Adjusted odds ratios (aORs) for OASIS with 95% CI are reported from multivariate logistic regression analyses. The data were analyzed by using PASW (Predictive Analytics SoftWare, SPSS Inc., version 19.0, Chicago, IL).

## Results

Overall incidence of anal sphincter injury in vaginal deliveries was significantly reduced by 50%, from 4.0% (591/14787) in the first time period (2003-5) to 1.9% (316/16922) in the second time period (2008-10). The reduction of the incidence of OASIS was of similar magnitude across all studied subgroups defined by risk factors, for both primi- and multiparous women (Table 2).

Table 2 Incidence of OASIS in different subgroups of women. Data are presented in frequencies (and numbers). *P*-values from Chi-square test.

| Time period         | Primiparous women |                | Multiparous women |                |               |          |
|---------------------|-------------------|----------------|-------------------|----------------|---------------|----------|
|                     | 2003-05           | 2008-10        |                   | 2003-05        | 2008-10       |          |
| OASIS               | 6.1 (489/8051)    | 3.0 (263/8837) |                   | 1.5 (102/6736) | 0.7 (53/8085) |          |
| <b>Risk factors</b> |                   |                |                   |                |               |          |
| Age, years          |                   |                | <i>P</i>          |                |               | <i>P</i> |
| 15-29               | 5.5 (212/3885)    | 2.8 (107/3872) | <0.001            | 1.4 (25/1849)  | 0.5 (9/1730)  | 0.01     |
| 30-34               | 6.7 (212/3164)    | 3.3 (118/3604) | <0.001            | 1.6 (45/2823)  | 0.7 (22/3287) | 0.001    |
| 35-51               | 6.5 (65/1002)     | 2.8 (38/1361)  | <0.001            | 1.6 (32/2064)  | 0.7 (22/3068) | 0.004    |

**Birthweight, grams**

|           |                |                |        |               |               |        |
|-----------|----------------|----------------|--------|---------------|---------------|--------|
| 720-2999  | 3.0 (39/1321)  | 1.6 (23/1446)) | 0.016  | 0.4 (3/794)   | 0.5 (5/938)   | 0.63   |
| 3000-3499 | 4.4 (135/3050) | 2.6 (90/3470)  | <0.001 | 0.8 (18/2191) | 0.4 (10/2591) | 0.049  |
| 3500-3999 | 7.2 (192/2670) | 3.4 (101/2983) | <0.001 | 1.3 (33/2447) | 0.6 (19/3029) | 0.006  |
| 4000-4499 | 11.2 (99/885)  | 4.8 (39/821)   | <0.001 | 3.2 (34/1049) | 0.7 (9/1247)  | <0.001 |
| 4500-5850 | 19.2 (24/125)  | 8.5 (10/117)   | 0.017  | 5.5 (14/255)  | 3.6 (10/280)  | 0.28   |

**Delivery method**

|             |                 |                |        |               |               |        |
|-------------|-----------------|----------------|--------|---------------|---------------|--------|
| Spontaneous | 4.8 (318/6558)  | 2.5 (170/6918) | <0.001 | 1.4 (91/6479) | 0.6 (45/7793) | <0.001 |
| Ventouse    | 10.8 (144/1331) | 5.0 (90/1802)  | <0.001 | 3.4 (8/234)   | 2.9 (8/273)   | 0.75   |
| Forceps     | 16.7 (27/162)   | 2.6 (3/117)    | <0.001 | 13.0 (3/23)   | 0 (0/19)      | 0.10   |

**Episiotomy, all deliveries**

|     |                |                |        |               |               |        |
|-----|----------------|----------------|--------|---------------|---------------|--------|
| Yes | 6.6 (166/2528) | 3.0 (96/3203)  | <0.001 | 2.0 (10/492)  | 1.8 (12/656)  | 0.80   |
| No  | 5.8 (323/5523) | 3.0 (167/5634) | <0.001 | 1.5 (92/6244) | 0.6 (41/7429) | <0.001 |

**Episiotomy, spontaneous deliveries**

|     |                |                |        |               |               |        |
|-----|----------------|----------------|--------|---------------|---------------|--------|
| Yes | 4.0 (65/1620)  | 2.2 (34/1569)  | <0.003 | 1.3 (5/396)   | 1.3 (6/477)   | 1.00   |
| No  | 5.1 (253/4938) | 2.5 (136/5349) | <0.001 | 1.4 (86/6083) | 0.5 (39/7316) | <0.001 |

**Episiotomy, instrumental deliveries**

|     |                |               |        |             |             |      |
|-----|----------------|---------------|--------|-------------|-------------|------|
| Yes | 11.1 (101/908) | 3.8 (62/1634) | <0.001 | 5.2 (5/96)  | 3.4 (6/179) | 0.45 |
| No  | 12.0 (70/585)  | 10.9 (31/285) | 0.64   | 3.7 (6/161) | 1.8 (2/113) | 0.34 |

**Duration 2<sup>nd</sup> stage, min**

|        |                |               |        |               |               |        |
|--------|----------------|---------------|--------|---------------|---------------|--------|
| 0-09   | 4.6 (13/281)   | 3.3 (9/273)   | 0.42   | 0.9 (20/2335) | 0.4 (10/2390) | 0.058  |
| 10-29  | 4.0 (99/2455)  | 2.9 (74/2591) | 0.02   | 1.5 (50/3361) | 0.5 (21/4505) | <0.001 |
| 30-59  | 5.5 (180/3290) | 2.5 (93/3673) | <0.001 | 2.9 (24/839)  | 1.7 (16/957)  | 0.09   |
| 60-205 | 9.7 (193/1994) | 3.8 (87/2288) | <0.001 | 4.0 (7/174)   | 2.3 (5/219)   | 0.32   |

**Epidural**



|    |                          |                |                |        |                |               |        |
|----|--------------------------|----------------|----------------|--------|----------------|---------------|--------|
| 1  |                          |                |                |        |                |               |        |
| 2  |                          |                |                |        |                |               |        |
| 3  | Yes                      | 6.5 (228/3494) | 3.0 (128/4267) | <0.001 | 2.0 (20/1008)  | 0.8 (12/1419) | 0.015  |
| 4  |                          |                |                |        |                |               |        |
| 5  | No                       | 5.7 (261/4557) | 3.0 (135/4570) | <0.001 | 1.4 (82/5728)  | 0.6 (41/6666) | <0.001 |
| 6  |                          |                |                |        |                |               |        |
| 7  | <b>Shoulder dystocia</b> |                |                |        |                |               |        |
| 8  |                          |                |                |        |                |               |        |
| 9  | Yes                      | 15.8 (12/76)   | 14.1 (9/64)    | 0.78   | 5.7 (5/87)     | 4.1 (3/73)    | 0.64   |
| 10 |                          |                |                |        |                |               |        |
| 11 | No                       | 6.0 (477/7975) | 2.9 (254/8773) | <0.001 | 1.5 (97/6649)  | 0.6 (50/8012) | <0.001 |
| 12 |                          |                |                |        |                |               |        |
| 13 | <b>Occiput posterior</b> |                |                |        |                |               |        |
| 14 |                          |                |                |        |                |               |        |
| 15 | <b>presentation</b>      |                |                |        |                |               |        |
| 16 |                          |                |                |        |                |               |        |
| 17 | Yes                      | 11.4 (20/176)  | 6.9 (17/245)   | 0.11   | 0.7 (1/150)    | 1.7 (4/237)   | 0.39   |
| 18 |                          |                |                |        |                |               |        |
| 19 | No                       | 6.0 (469/7875) | 2.9 (246/8592) | <0.001 | 1.5 (101/6586) | 0.6 (49/7848) | <0.001 |
| 20 |                          |                |                |        |                |               |        |
| 21 | <b>Induced labour</b>    |                |                |        |                |               |        |
| 22 |                          |                |                |        |                |               |        |
| 23 | Yes                      | 5.5 (75/1365)  | 3.0 (50/1650)  | 0.001  | 1.3 (12/903)   | 0.7 (9/1269)  | 0.18   |
| 24 |                          |                |                |        |                |               |        |
| 25 | No                       | 6.2 (414/6686) | 3.0 (213/7187) | <0.001 | 1.5 (90/5833)  | 0.6 (44/6816) | <0.001 |
| 26 |                          |                |                |        |                |               |        |

27

28

29

30 The incidence of OASIS over the study years is displayed in Figure 1, demonstrating a

31 reduced incidence of OASIS, which in time follows the implementation of the perineum

32 support program for the staff. Figure 1 also demonstrates a similar reduction of OASIS

33 incidence for the different delivery methods (operative and spontaneous vaginal delivery)

34 between the two study periods: in spontaneous deliveries the OASIS incidence was reduced

35 from 3.1% (409/13037) to 1.5% (215/14711) and in ventouse from 9.7% (152/1565) to 4.7%

36 (98/2075). Forceps is less used in our department, but a significant OASIS reduction was also

37 observed in forceps deliveries from 16.2% (30/185) to 2.2% (3/136).

38

39

40

41

42

43

44

45

46

47

48

#### 49 **Population characteristics across the study years**

50 Overall changes in population characteristics between the two time periods were small, but

51 the prevalence of older women (>35 years) was significantly higher in the second period

52 (2008-10), and use of ventouse delivery, episiotomy, epidural and induction of labour was

53

54

55

56

57

58

59

60

more frequent (Table 1). Primiparous women comprised 85% of the women with OASIS, but represented only 53.3 % of the overall study population.

### Primiparous women

In a univariate analysis, higher infant birth weight, larger infant head circumference (data not shown), prolonged second stage of labour, instrumental delivery, shoulder dystocia and persistent occiput posterior presentation were significant OASIS risk factors for primiparous women in the first study period (Table 3). In the second study period, the same OASIS risk factors remained significant, except for prolonged second stage of labour (Table 3).

Table 3 Clinical characteristics and obstetric interventions among primiparous women with OASIS and women without OASIS. Data are presented in frequencies (and numbers).

*P*-values from Chi-square test.

| Primiparous women         | 2003-05         |               | 2008-10         |               |
|---------------------------|-----------------|---------------|-----------------|---------------|
|                           | OASIS           | Non-OASIS     | OASIS           | Non-OASIS     |
| n deliveries              | n=489           | n=7562        | n=263           | n=8574        |
| Incidence OASIS           | 6.1 (489/7562)  |               | 3.0 (263/8574)  |               |
| <b>Risk factors</b>       | %               |               | %               |               |
| Age, years                | <i>P</i> =0.08  |               | <i>P</i> =0.39  |               |
| 15-29                     | 43.4 (n=212)    | 48.6 (n=3673) | 40.7 (n=107)    | 43.9 (n=3765) |
| 30-34                     | 43.4 (n=212)    | 39 (n=2952)   | 44.9 (n=118)    | 40.7 (n=3486) |
| 35-51                     | 13.3 (n=65)     | 12.4 (n=937)  | 14.4 (n=38)     | 15.4 (n=1323) |
| <b>Birthweight, grams</b> | <i>P</i> <0.001 |               | <i>P</i> <0.001 |               |
| 720-2999                  | 8.0 (n=39)      | 17.0 (n=1282) | 8.7 (n=23)      | 16.6 (n=1423) |
| 3000-3499                 | 27.6 (n=135)    | 38.5 (n=2915) | 34.2 (n=90)     | 39.4 (n=3380) |
| 3500-3999                 | 39.3 (n=192)    | 32.8 (n=2478) | 38.4 (n=101)    | 33.6 (n=2882) |
| 4000-4499                 | 20.2 (n=99)     | 10.4 (n=786)  | 14.8 (n=39)     | 9.1 (n=782)   |

|                                            |                 |               |                 |               |
|--------------------------------------------|-----------------|---------------|-----------------|---------------|
| 4500-5850                                  | 4.9 (n=24)      | 1.3 (n=101)   | 3.8 (n=10)      | 1.2 (n=107)   |
| <b>Delivery method</b>                     | <i>P</i> <0.001 |               | <i>P</i> <0.001 |               |
| Spontaneous                                | 65.0 (n=318)    | 82.5 (n=6240) | 64.6 (n=170)    | 78.7 (n=6748) |
| Ventouse                                   | 29.4 (n=144)    | 15.7 (n=1187) | 34.2 (n=90)     | 20.0 (n=1712) |
| Forceps                                    | 5.5 (n=27)      | 1.8 (n=135)   | 1.1(n=3)        | 1.3(n=114)    |
| <b>Episiotomy, all vaginal deliveries</b>  | <i>P</i> =0.21  |               | <i>P</i> =0.93  |               |
|                                            | 33.9 (n=166)    | 31.2 (n=2362) | 36.5 (n=96)     | 36.2 (n=3107) |
| <b>Episiotomy, spontaneous deliveries</b>  | <i>P</i> =0.07  |               | <i>P</i> =0.40  |               |
|                                            | 20.4 (n=65)     | 24.9 (n=1555) | 20.0 (n=34)     | 22.7 (n=1535) |
| <b>Episiotomy, instrumental deliveries</b> | <i>P</i> <0.001 |               | <i>P</i> <0.001 |               |
|                                            | 59.1 (n=101)    | 61.0 (n=807)  | 66.7 (n=62)     | 86.1 (n=1572) |
| <b>Duration 2<sup>nd</sup> stage, min</b>  | <i>P</i> <0.001 |               | <i>P</i> =0.07  |               |
| 0-09                                       | 2.7 (n=13)      | 3.5 (n=268)   | 3.4 (n=9)       | 3.1 (n=264)   |
| 10-29                                      | 20.2 (n=99)     | 31.2 (n=2356) | 28.1 (n=74)     | 29.4 (n=2517) |
| 30-59                                      | 36.8 (n=180)    | 41.1 (n=3110) | 35.4 (n=93)     | 41.8 (n=3580) |
| 60-205                                     | 39.5 (n=193)    | 23.8 (n=1801) | 33.1 (n=87)     | 25.7 (n=2201) |
| Missing data (n=4/n=27)                    | 0.8 (n=4)       | 0.4 (n=27)    | 0 (n=0)         | 0.1 (n=12)    |
| <b>Epidural</b>                            | <i>P</i> =0.14  |               | <i>P</i> =0.90  |               |
|                                            | 46.6 (n=228)    | 43.2 (n=3266) | 48.7 (n=128)    | 48.3 (n=4139) |
| <b>Shoulder dystocia</b>                   | <i>P</i> <0.001 |               | <i>P</i> <0.001 |               |
|                                            | 2.5 (n=12)      | 0.8 (n=64)    | 3.4 (n=9)       | 0.6 (n=55)    |
| <b>Occiput posterior presentation</b>      | <i>P</i> =0.003 |               | <i>P</i> <0.001 |               |
|                                            | 4.1 (n=20)      | 2.1 (n=156)   | 6.5 (n=17)      | 2.7 (n=228)   |
| <b>Induced labour</b>                      | <i>P</i> =0.32  |               | <i>P</i> =0.89  |               |
|                                            | 15.3 (n=75)     | 17.1 (n=1290) | 19.0 (n=50)     | 18.7 (n=18.7) |

Looking at the various explanatory variables (such as age, maternal BMI, fetal weight etc) and analyzing time period solely as an explanatory variable for OASIS (due to the perineal protection programme introduced in the second time period), we observed that the first time period emerged as one of the most important “risk factors” with high OR for OASIS in our study. Without adjusting for any other variables, OR for OASIS in the logistic regression analysis for the first study period as compared to the second was 2.10 (95% CI 1.76 to 2.40).

In a multivariate regression analysis (Table 4), large infant birth weight, instrumental delivery, prolonged second stage and occiput posterior presentation were significant risk factors for OASIS in the first study period. In the second study period, when the incidence of OASIS was reduced, only instrumental delivery and fetal occiput posterior presentation remained significant risk factors for OASIS.

Table 4 Risk factors for OASIS in the multivariate regression model (adjusted odds ratio (aOR) and 95% confidence intervals).

| Time period               | Primiparous women   |                     | Multiparous women   |                     |
|---------------------------|---------------------|---------------------|---------------------|---------------------|
|                           | 2003-05             | 2008-10             | 2003-05             | 2008-10             |
| n vaginal deliveries      | n=8051              | n=8837              | n=6736              | n=8085              |
| n OASIS                   | 489                 | 263                 | 102                 | 53                  |
| Incidence OASIS           | 6.0 %               | 3.0%                | 1.5%                | 0.7%                |
| <b>Risk factors</b>       | aOR (95% CI)        | aOR (95% CI)        | aOR (95% CI)        | aOR (95% CI)        |
| <b>Age, years</b>         |                     |                     |                     |                     |
| 15-29                     | 0.90 (0.72 to 1.08) | 0.90 (0.67 to 1.15) | 0.99 (0.60 to 1.64) | 0.86 (0.40 to 1.90) |
| 30-34                     | 1                   | 1                   | 1                   | 1                   |
| 35-51                     | 0.96 (0.71 to 1.28) | 0.84 (0.58 to 1.22) | 0.91 (0.57 to 1.44) | 0.95 (0.52 to 1.75) |
| <b>Birthweight, grams</b> |                     |                     |                     |                     |

|                                           |                     |                     |                     |                      |
|-------------------------------------------|---------------------|---------------------|---------------------|----------------------|
| 720-3499                                  | 0.70 (0.55 to 0.87) | 0.80 (0.60 to 1.08) | 0.46 (0.25 to 0.82) | 0.93 (0.44 to 1.94)  |
| 3500-3999                                 | 1                   | 1                   | 1                   | 1                    |
| 4000-5850                                 | 1.50 (1.16 to 1.92) | 1.26 (0.87 to 1.83) | 2.81 (1.73 to 4.58) | 1.19 (0.58 to 2.45)  |
| <b>Delivery method</b>                    |                     |                     |                     |                      |
| Spontaneous                               | 1                   | 1                   | 1                   | 1                    |
| Instrumental                              | 2.10 (1.71 to 2.68) | 2.46 (1.74 to 3.47) | 2.19 (1.02 to 4.73) | 1.72 (0.64 to 4.66)  |
| <b>Episiotomy</b>                         |                     |                     |                     |                      |
| No                                        | 1                   | 1                   | 1                   | 1                    |
| Yes                                       | 0.72 (0.58 to 0.90) | 0.52 (0.38 to 0.73) | 0.92 (0.46 to 1.87) | 1.57 (0.71 to 3.49)  |
| <b>Duration 2<sup>nd</sup> stage, min</b> |                     |                     |                     |                      |
| 0-29                                      | 0.80 (0.62 to 1.02) | 1.18 (0.87 to 1.60) | 0.50 (0.31 to 0.82) | 0.34 (0.18 to 0.64)  |
| 30-59                                     | 1                   | 1                   | 1                   | 1                    |
| 60-205                                    | 1.40 (1.15 to 1.79) | 1.29 (0.95 to 1.75) | 1.03 (0.41 to 2.58) | 0.83 (0.28 to 2.48)  |
| <b>Epidural</b>                           |                     |                     |                     |                      |
| No                                        | 1                   | 1                   | 1                   | 1                    |
| Yes                                       | 0.95 (0.78 to 1.15) | 0.86 (0.67 to 1.12) | 1.15 (0.69 to 1.93) | 0.88 (0.44 to 1.76)  |
| <b>Shoulder dystocia</b>                  |                     |                     |                     |                      |
| No                                        | 1                   | 1                   | 1                   | 1                    |
| Yes                                       | 1.58 (0.83 to 1.39) | 3.73 (1.76 to 7.90) | 1.58 (0.60 to 4.16) | 2.25 (0.50 to 10.10) |
| <b>Occiput posterior presentation</b>     |                     |                     |                     |                      |
| No                                        | 1                   | 1                   | 1                   | 1                    |
| Yes                                       | 1.72 (1.04 to 2.82) | 2.40 (1.42 to 4.06) | 0.24 (0.03 to 1.78) | 1.95 (0.66 to 5.73)  |
| <b>Induced labour</b>                     |                     |                     |                     |                      |
| No                                        | 1                   | 1                   | 1                   | 1                    |
| Yes                                       | 0.77 (0.60 to 1.00) | 0.92 (0.66 to 1.27) | 0.86 (0.46 to 1.60) | 0.81 (0.37 to 1.77)  |

Frequency of episiotomy use in spontaneous deliveries of primiparous women was reduced from the first time period to the second, and increased in instrumental deliveries (Table 1). When adjusted for risk factors in the multivariate analysis, episiotomy appeared as a protective factor for OASIS in both time periods for primiparous women (Table 4).

Primiparous women with a previous caesarean section only, and no previous vaginal delivery (n=440), had an increased OASIS risk compared to women with no previous delivery OR=2.2 (95% CI 1.6 to 3.1), both in the first time period (11.5% and 5.9%, respectively,  $P=0.001$ ) and in the second (6.7% and 2.9%, respectively,  $P=0.001$ ). Also in this subgroup, the OASIS incidence was reduced with 50% after implementation of the perineal protection programme. When the various study analyses were performed without this small subgroup of vaginal primiparous women with one previous caesarean only, the study conclusions remained unaltered, as expected due to the small number of women in this subgroup.

### **Multiparous women**

In a univariate analysis for multiparous women (Table 5), instrumental delivery, prolonged second stage of delivery, shoulder dystocia, large infant head circumference (data not shown) and birth weight were significant risk factors for OASIS in both time periods. The risk of OASIS was markedly reduced from the first to the second time period and the time period for the delivery was one of the most important “risk factors”; OR for OASIS in the logistic regression analysis for the first time period as compared to the second was 2.31 (95% CI 1.65 to 3.25).

Table 5 Clinical characteristics and obstetric interventions among multiparous women with OASIS and women without OASIS. Data are presented in frequencies (and numbers).  $P$ -values from Chi-square test.

| <b>Multiparous women</b> | <b>2003-05</b> | <b>2008-10</b> |
|--------------------------|----------------|----------------|
|--------------------------|----------------|----------------|

|                                            | OASIS           | Non-OASIS     | OASIS           | Non-OASIS     |
|--------------------------------------------|-----------------|---------------|-----------------|---------------|
| n deliveries                               | n=102           | n=6634        | n=53            | n=8032        |
| Incidence OASIS                            | 1.5 (102/6634)  |               | 0.7 (53/8032)   |               |
| <b>Risk factors</b>                        | %               |               | %               |               |
| Age, years                                 | <i>P</i> =0.79  |               | <i>P</i> =0.71  |               |
| 15-29                                      | 24.5 (n=25)     | 27.5 (n=1824) | 17.0 (n=9)      | 21.4 (n=1721) |
| 30-34                                      | 44.1 (n=45)     | 41.9 (n=2778) | 41.5 (n=22)     | 40.6 (n=3265) |
| 35-51                                      | 31.4 (n=32)     | 30.6 (n=2032) | 41.5 (n=22)     | 37.9 (n=3046) |
| <b>Birthweight, grams</b>                  | <i>P</i> <0.001 |               | <i>P</i> <0.001 |               |
| 720-2999                                   | 2.9 (n=3)       | 11.9 (n=791)  | 9.4 (n=5)       | 11.6 (n=933)  |
| 3000-3499                                  | 17.6 (n=18)     | 32.8 (n=2173) | 18.9 (n=10)     | 32.1 (n=2581) |
| 3500-3999                                  | 32.4 (n=33)     | 36.4 (n=2414) | 35.8 (n=19)     | 37.5 (n=3010) |
| 4000-4499                                  | 33.3 (n=34)     | 15.3 (n=1015) | 17.0 (n=9)      | 15.4 (n=1238) |
| 4500-5850                                  | 13.7 (n=14)     | 3.6 (n=241)   | 18.9 (n=10)     | 3.4 (n=270)   |
| <b>Delivery method</b>                     | <i>P</i> <0.001 |               | <i>P</i> <0.001 |               |
| Spontaneous                                | 89.2 (n=91)     | 96.3 (n=6388) | 84.9 (n=45)     | 96.5 (n=7748) |
| Ventouse                                   | 7.8 (n=8)       | 3.4 (n=226)   | 15.1 (n=8)      | 3.3 (n=265)   |
| Forceps                                    | 2.9 (n=3)       | 0.3 (n=20)    | 0 (n=0)         | 0.2 (n=19)    |
| <b>Episiotomy, all vaginal deliveries</b>  | <i>P</i> =0.33  |               | <i>P</i> <0.001 |               |
|                                            | 9.8 (n=10)      | 7.3 (n=482)   | 22.6 (n=12)     | 8.0 (n=644)   |
| <b>Episiotomy, spontaneous deliveries</b>  | <i>P</i> =0.80  |               | <i>P</i> =0.43  |               |
|                                            | 5.5 (n=5)       | 6.1 (n=391)   | 13.3 (n=6)      | 6.1 (n=471)   |
| <b>Episiotomy, instrumental deliveries</b> | <i>P</i> =0.57  |               | <i>P</i> =0.42  |               |
|                                            | 45.5 (n=5)      | 37.0 (n=91)   | 75 (n=6)        | 60.9 (n=173)  |
| <b>Duration 2<sup>nd</sup> stage, min</b>  | <i>P</i> <0.001 |               | <i>P</i> <0.001 |               |
| 0-09                                       | 19.6 (n=20)     | 34.9 (n=2315) | 18.9 (n=10)     | 29.6 (n=2380) |
| 10-29                                      | 49.0 (n=50)     | 49.9 (n=3311) | 39.6 (n=21)     | 55.8 (n=4484) |

|                                       |                 |              |                 |               |
|---------------------------------------|-----------------|--------------|-----------------|---------------|
| 30-59                                 | 23.5 (n=24)     | 12.3 (n=815) | 30.2 (n=16)     | 11.7 (n=941)  |
| 60-205                                | 6.9 (n=7)       | 2.5 (n=167)  | 9.4 (n=5)       | 2.7 (n=214)   |
| Missing data (n=4/n=27)               | 1.0 (n=1)       | 0.4 (n=26)   | 1.9 (n=1)       | 0.2 (n=13)    |
| <b>Epidural</b>                       | <i>P</i> =0.21  |              | <i>P</i> =0.36  |               |
|                                       | 19.6 (n=20)     | 14.9 (n=988) | 22.6 (n=12)     | 17.5 (n=1407) |
| <b>Shoulder dystocia</b>              | <i>P</i> =0.001 |              | <i>P</i> <0.001 |               |
|                                       | 4.9 (n=5)       | 1.2 (n=82)   | 5.7 (n=3)       | 0.9 (n=70)    |
| <b>Occiput posterior presentation</b> | <i>P</i> =0.39  |              | <i>P</i> =0.046 |               |
|                                       | 1.0 (n=1)       | 2.2 (n=149)  | 7.5 (n=4)       | 2.9 (n=233)   |
| <b>Induced labour</b>                 | <i>P</i> =0.62  |              | <i>P</i> =0.80  |               |
|                                       | 11.8 (n=12)     | 13.4 (n=891) | 17.0 (n=9)      | 15.7 (n=1260) |

In the multivariate regression analysis (Table 4), macrosomia and instrumental delivery significantly increased the OASIS risk for multiparous women in the first time period, but not in the second. In the second time period, none of the identified risk factors for OASIS were significant for multiparous women. However, OASIS cases were few (n=53) in this subgroup of women. In the multivariate analysis the effect of episiotomy was non-significant in both time periods (Table 4). However, multiparous women with episiotomy were very few in this study and interpretation of the results should be undertaken cautiously (Table 2 and 5).

## Discussion

In this study, comprising 31 709 vaginal deliveries, the OASIS incidence was reduced by 50% after introduction of a training program on perineal protection during the second stage of delivery, aimed at reducing incidence of OASIS. The reduction in the OASIS incidence was similar in all subgroups defined by OASIS risk factors.



1  
2  
3 Similar reduction in OASIS following alteration in clinical routines and intervention  
4 programmes during the second stage of delivery have been presented previously, both in  
5 Norway,[17, 18] and in the US ,[21], but we are not aware of other publications exploring the  
6 reduced incidence of OASIS in different subgroups defined by risk factors.  
7  
8  
9  
10

### 11 12 13 14 **Strengths and limitations of the study**

15  
16 Strengths of this hospital-based large observational study includes a very low risk of  
17 diagnostic misclassification of the OASIS outcome as all OASIS diagnoses were validated for  
18 study purposes in addition to primarily being diagnosed by at least two accoucheurs, and  
19 always by an obstetrician or gynecologist. This is in contrast to studies based on registries that  
20 are not primarily created for research, but are established for other purposes for the health  
21 care providers. In our study, the medical records of all patients registered with an OASIS were  
22 carefully reviewed by one senior consultant (KL). In addition, diagnosis of OASIS cases were  
23 cross-checked between several available sources (individual patient records, delivery unit  
24 protocols and hospital discharge lists, including ICD-10 diagnose codes and surgical codes for  
25 OASIS repair) for the study years. Another strength is that the study was carried out at in a  
26 single large hospital focusing on improved quality of primary diagnosis and repair of OASIS,  
27 and this also reduces the risk of misclassification in registration. Strength of the study is also  
28 the unselected population of delivering women and a large number of deliveries.  
29  
30  
31  
32  
33  
34  
35  
36  
37  
38  
39  
40  
41  
42  
43  
44

45 A randomized controlled trial (RCT) would be the optimal design for evaluating a  
46 OASIS reducing effect of manual perineum protection, but carrying out such an RCT is  
47 challenging during delivery, due to contamination of methods in different study arms and  
48 problems with blinding of patients or staff. We did not conduct an RCT because in Norway,  
49 several hospitals already had managed to reduce the incidence of OASIS with implementation  
50 of improved manual perineal protection, and we consider randomizing women to hands-off  
51  
52  
53  
54  
55  
56  
57  
58  
59  
60

1  
2  
3 delivering techniques as unethical in the light of these recent historical clinical results.  
4  
5 Previous RCTs have not shown a beneficial effect on OASIS by hands-on perineal protection,  
6  
7 but the published RCTs have not described a structured training of the staff, such as the  
8  
9 intervention programme of our study,[22]. These trials had problems with bias caused by  
10  
11 contamination of compared methods and different use of medial episiotomy in the study  
12  
13 arms,[23, 24], were under-powered to explore OASIS, or were not designed to assess OASIS,  
14  
15 but perineal pain or perineal injury in general (including 1<sup>st</sup> and 2<sup>nd</sup> degree tears and  
16  
17 episiotomy),[23-25]. The marked 50% reduction in the OASIS incidence obtained in our  
18  
19 delivery unit appeared simultaneously with the introduction of a manual perineal protection  
20  
21 during second stage of labour. The main difference for our study population between the two  
22  
23 time periods was the perineum protection training programme, the patient characteristics  
24  
25 remained almost unaltered between the time periods and could not explain the reduction of  
26  
27 incidence of OASIS. Thus, our study indicates that such a perineal protection programme has  
28  
29 a beneficial effect in reducing the incidence of OASIS, both for primiparous and multiparous  
30  
31 women, despite the lack of an RCT supporting this conclusion.  
32  
33  
34  
35

36 A weakness of our study is that the use of perineum support method, if used during  
37  
38 second stage of delivery, was not registered in the medical records, and therefore, use of  
39  
40 perineum support could not be assessed directly in our retrospective study. However, if this  
41  
42 method was not used in some deliveries during the second time period or was used in some  
43  
44 deliveries during the first time period, our study would tend to underestimate the OASIS  
45  
46 incidence reducing effect of the perineum protection intervention program, and hence, our  
47  
48 efficacy estimates on reduction of OASIS from the intervention are minimum estimates.  
49  
50  
51  
52

### 53 **Meaning of the study**

54  
55  
56  
57  
58  
59  
60

1  
2  
3 The observed reduction of incidence of OASIS came rapidly after the introduction of the  
4 perineal protection programme and the low incidence of OASIS has lasted over the last years.  
5  
6  
7 The changes in clinical characteristics of the study population were very modest between the  
8  
9 two time periods, and cannot explain the rapid reduction of the incidence of OASIS. Without  
10  
11 the intervention programme, we could have expected an increase of the incidence of OASIS  
12  
13 in the second time period, as one of the most important OASIS risk factors, instrumental  
14  
15 delivery, became more frequent in the study population (Table 1) over the study years. In our  
16  
17 study the reduction of incidence of OASIS was surprisingly consistent in all subgroups  
18  
19 defined by OASIS risk factors (Table 2). The decrease of the incidence of OASIS was similar  
20  
21 in spontaneous and operative deliveries and in parity groups (primiparous and multiparous),  
22  
23 again surprising, as primiparity is one of the most important risk factors for OASIS, as is  
24  
25 operative delivery,[5, 10, 15]. Interestingly, as shown in Figure 1, the 2010 incidence of  
26  
27 OASIS in women delivered by ventouse delivery is of similar magnitude as the incidence of  
28  
29 OASIS in the spontaneous deliveries was back in 2005 (3.6 and 3.8%, respectively).  
30  
31  
32  
33

34 Underreporting OASIS cases in the second time period is an unlikely cause for the  
35  
36 registered reduction of the incidence of OASIS, as the procedure emphasizing more than one  
37  
38 accoucheur present at all deliveries was introduced before the second study period in form of  
39  
40 a written procedure. Caesarean rate was unaltered between the two study periods and cannot  
41  
42 explain the reduction of the incidence of OASIS.  
43  
44  
45  
46

### 47 **Comparison with other studies**

48  
49 Traditionally, there has been a focus on OASIS risk factors with high OR. However, such risk  
50  
51 factors may not necessarily represent the most frequent events in a delivery unit. Shoulder  
52  
53 dystocia and occiput posterior presentation are examples of risk factors with high OR and a  
54  
55 very low incidence,[5, 15]. In numbers, most of the OASIS occurs during deliveries with low  
56  
57  
58  
59  
60

1  
2  
3 risk; during spontaneous deliveries with an infant of normal size. In our study, the number of  
4  
5 women with OASIS illustrates the major groups of women that will suffer this obstetric  
6  
7 complication; of the 752 primiparous women with OASIS in our study, 488 delivered  
8  
9 spontaneously, only 21 after shoulder dystocia, 39 from an infant in occiput posterior  
10  
11 presentation. In total 77% (580/752) of the primiparous women with OASIS delivered an  
12  
13 infant that was not macrosomic (>4000g). Actually, 38% of the women with OASIS delivered  
14  
15 an infant smaller than the mean infant birth weight (3500 g) in our study population.

16  
17  
18 Medial and close to medial episiotomies have a higher risk for OASIS,[20]. Large  
19  
20 register studies show that mediolateral and lateral episiotomies have a protecting effect  
21  
22 against OASIS, particularly among primiparous women and in instrumental deliveries,[9, 10,  
23  
24 26-28]. Use of episiotomy was registered in our study, but type of episiotomy was not  
25  
26 registered, and improvement of performed episiotomy technique in order to avoid median cuts  
27  
28 was a part of the training package at our delivery unit.

29  
30  
31 During the study period, the use of episiotomy in our hospital decreased slightly in  
32  
33 spontaneous deliveries in primiparous women (from 24.7 to 22.7%), but increased in  
34  
35 instrumental deliveries in primiparous women (from 60.8 to 85.1%) (Table 1), and was shown  
36  
37 to be a protective factor against OASIS for primiparous women in both time periods (Table  
38  
39 4). Differences in effect of episiotomy between different parity groups on OASIS occurrence  
40  
41 can be explained by indication bias, a mix between cause and effect, as episiotomy is used in  
42  
43 deliveries with high OASIS risk. Multiparous women needing episiotomy may represent a  
44  
45 group of women with difficult delivery with many risk factors.

## 51 52 **Research and policy implications**

53  
54 We expected a more notable reduction of the incidences of OASIS in the subgroups with  
55  
56 lower risk (low or normal infant birth weight), as compared to women with higher risk (large  
57  
58  
59  
60

1  
2  
3 infant), if the perineal support program had been followed consistently in all deliveries. We  
4  
5 believe that a non-consistent use of perineum support in deliveries with lower risk for OASIS  
6  
7 could account for the results; the main clinical focus was on women with high risk for OASIS,  
8  
9 based on publications focusing on such risk factors. Previous studies have shown that  
10  
11 antenatal scoring systems based on patient risk factors could not predict OASIS [29-31],  
12  
13 therefore methods that reduce risk for OASIS should be offered to all delivering women, not  
14  
15 only for women in high risk for OASIS.  
16  
17

18  
19 The training programme for perineal protection is a low-cost intervention requiring no  
20  
21 extra resources or equipment, only training of the existing staff. Such perineum protection  
22  
23 programmes were previously successfully implemented in five hospitals in Norway ,[17, 18],  
24  
25 therefore we can conclude that the programme is easily generalisable and applicable to other  
26  
27 settings than ours.  
28  
29

### 30 31 32 **Conclusions**

33  
34 Our study shows a large and rapid reduction of the incidence of OASIS following an  
35  
36 introduction of a perineum support programme, across all risk groups of OASIS. We suggest  
37  
38 that future OASIS research should focus more on variables connected to delivery procedures,  
39  
40 including perineal protection procedures during delivery, and not restricting risk analyses to  
41  
42 demographic and individual obstetric data of the delivering woman or the infant. Using  
43  
44 manual perineal protection is a low-cost intervention and requires no extra resources or  
45  
46 equipment, except for training of the existing personnel. The reduction of incidence of  
47  
48 OASIS in the last time period of our study could not be explained by the differences in patient  
49  
50 characteristics or risk factors across the study period, because the incidence of these risk  
51  
52 factors in the two time periods were either the same or increased in the second time period.  
53  
54  
55 Our study indicates that training programme for improved perineal protection can reduce the  
56  
57  
58  
59  
60

1  
2  
3 risk of OASIS across all groups of delivering women, not only in high risk groups.  
4  
5

6 Competing Interests Statement: There are no competing interests  
7

8 Contributorship Statement: All the authors' contributed to create the manuscript:  
9

10  
11 KL: Had the study idea and initiated the study. Planned the study. Performed data retrieval  
12 from hospital systems and records. Performed all data analyses. Wrote first draft of  
13 manuscript, prepared the manuscript and submitted last version.  
14

15  
16 FES: Participated in study planning, data analysis and manuscript prepare. Accepted last  
17 manuscript that was submitted.  
18

19  
20 LS: Participated in data analysis and manuscript prepare. Accepted last manuscript that was  
21 submitted  
22

23  
24 ACS: Supervised the planning of the study and all data analyses. Contributed to writing first  
25 draft of manuscript, revised the manuscript and accepted last manuscript that was  
26 submitted. PhD supervisor of first author (KL).  
27

28  
29 Data Sharing Statement: The dataset that has been used in this paper is available to all  
30 coauthors.  
31

32  
33 First author has done all statistical analyses, and all of these have been supervised and  
34 checked by the senior coauthors that are epidemiologists/statisticians (LV and FES).  
35

36  
37 Funding Statement: This research received no funding.  
38

### 39 References

- 40  
41 1. Räisänen S, Vehviläinen-Julkunen K, Gissler M, et al. Up to seven-fold inter-hospital  
42 differences in obstetric anal sphincter injury rates- A birth register-based study in  
43 Finland. *BMC Res Notes* 2010;**3**:345.  
44  
45  
46  
47 2. Laine K, Gissler M, Pirhonen J. Changing incidence of anal sphincter tears in four Nordic  
48 countries through the last decades. *Eur J Obstet Gynecol Reprod Biol* 2009;**146**:71-5.  
49  
50  
51 3. Pirhonen JP, Grenman SE, Haadem K, et al. Frequency of anal sphincter rupture at delivery  
52 in Sweden and Finland--result of difference in manual help to the baby's head. *Acta*  
53 *Obstet Gynecol Scand* 1998;**77**:974-7.  
54  
55  
56  
57  
58  
59  
60

- 1  
2  
3 4. Prager M, Andersson KL, Stephansson O, et al. The incidence of obstetric anal sphincter  
4  
5 rupture in primiparous women: a comparison between two European delivery settings.  
6  
7 *Acta Obstet Gynecol Scand* 2008;**87**:209-15.  
8
- 9  
10 5. Baghestan E, Irgens LM, Bordahl PE, et al. Trends in risk factors for obstetric anal  
11  
12 sphincter injuries in Norway. *Obstet Gynecol* 2010;**116**:25-34.  
13
- 14 6. Laine K, Skjeldestad FE, Sanda B, et al. Prevalence and risk factors for anal incontinence  
15  
16 after obstetric anal sphincter rupture. *Acta Obstet Gynecol Scand* 2011;**90**:319-24.  
17
- 18 7. Bols EM, Hendriks EJ, Berghmans BC, et al. A systematic review of etiological factors for  
19  
20 postpartum fecal incontinence. *Acta Obstet Gynecol Scand* 2010;**89**:302-14.  
21  
22
- 23 8. Norderval S, Nsubuga D, Bjelke C, et al. Anal incontinence after obstetric sphincter tears:  
24  
25 incidence in a Norwegian county. *Acta Obstet Gynecol Scand* 2004;**83**:989-94.  
26
- 27 9. de Leeuw JW, de Wit C, Kuijken JP, et al. Mediolateral episiotomy reduces the risk for  
28  
29 anal sphincter injury during operative vaginal delivery. *BJOG* 2008;**115**:104-8.  
30
- 31 10. Räisänen SH, Vehviläinen-Julkunen K, Gissler M, et al. Lateral episiotomy protects  
32  
33 primiparous but not multiparous women from obstetric anal sphincter rupture. *Acta*  
34  
35 *Obstet Gynecol Scand* 2009;**88**:1365-72.  
36  
37
- 38 11. Räisänen S, Vehviläinen-Julkunen K, Gissler M, et al. High episiotomy rate protects from  
39  
40 obstetric anal sphincter ruptures: a birth register-study on delivery intervention policies in  
41  
42 Finland. *Scand J Public Health* 2011;**39**:457-63.  
43  
44
- 45 12. Dahl C, Kjolhede P. Obstetric anal sphincter rupture in older primiparous women: a case-  
46  
47 control study. *Acta Obstet Gynecol Scand* 2006;**85**:1252-8.  
48
- 49 13. Bowling CB, Wheeler Ii TL, Gerten KA, et al. Sphincter tears in primiparous women: is  
50  
51 age a factor?. *Int Urogynecol J Pelvic Floor Dysfunct* 2008;**179**:600-4.  
52  
53
- 54 14. Gerdin E, Sverrisdottir G, Badi A, et al. The role of maternal age and episiotomy in the  
55  
56 risk of anal sphincter tears during childbirth. *Aust N Z J Obstet Gynaecol* 2007;**47**:286-  
57  
58  
59  
60

- 1  
2  
3 90.  
4  
5 15. Räisänen S, Vehviläinen-Julkunen K, Gissler M, et al. The increased incidence of  
6  
7 obstetric anal sphincter rupture--an emerging trend in Finland. *Prev Med* 2009;**49**:535-40.  
8  
9  
10 16. Ekeus C, Nilsson E, Gottvall K. Increasing incidence of anal sphincter tears among  
11  
12 primiparas in Sweden: a population-based register study. *Acta Obstet Gynecol Scand*  
13  
14 2008;**87**:564-73.  
15  
16 17. Laine K, Pirhonen T, Rolland R, et al. Decreasing the incidence of anal sphincter tears  
17  
18 during delivery. *Obstet Gynecol* 2008;**111**:1053-7.  
19  
20 18. Hals E, Øian P, Pirhonen T, et al. A multicenter interventional program to reduce the  
21  
22 incidence of anal sphincter tears. *Obstet Gynecol* 2010;**116**:901-8.  
23  
24 19. Roos AM, Thakar R, Sultan AH. Outcome of primary repair of obstetric anal sphincter  
25  
26 injuries (OASIS): does the grade of tear matter?. *Ultrasound Obstet Gynecol*  
27  
28 2010;**36**:368-74.  
29  
30 20. Coats PM, Chan KK, Wilkins M, et al. A comparison between midline and mediolateral  
31  
32 episiotomies. *Br J Obstet Gynaecol* 1980;**87**:408-12.  
33  
34 21. Hirsch E, Haney EI, Gordon TE, et al. Reducing high-order perineal laceration during  
35  
36 operative vaginal delivery. *Am J Obstet Gynecol* 2008;**198**:668.e1,668.e5.  
37  
38 22. Jönsson ER, Elfaghi I, Rydhström H, et al. Modified Ritgen's maneuver for anal sphincter  
39  
40 injury at delivery: a randomized controlled trial. *Obstet Gynecol* 2008;**112**:212-7.  
41  
42 23. McCandlish R, Bowler U, van Asten H, et al. A randomised controlled trial of care of the  
43  
44 perineum during second stage of normal labour. *Br J Obstet Gynaecol* 1998;**105**:1262-72.  
45  
46 24. Mayerhofer K, Bodner-Adler B, Bodner K, et al. Traditional care of the perineum during  
47  
48 birth. A prospective, randomized, multicenter study of 1,076 women. *J Reprod Med*  
49  
50 2002;**47**:477-82.  
51  
52  
53  
54  
55  
56 25. Albers LL, Sedler KD, Bedrick EJ, et al. Midwifery care measures in the second stage of  
57  
58  
59  
60



- 1  
2  
3 labor and reduction of genital tract trauma at birth: a randomized trial. *J Midwifery*  
4  
5 *Womens Health* 2005;**50**:365-72.  
6  
7 26. de Leeuw JW, Struijk PC, Vierhout ME, et al. Risk factors for third degree perineal  
8  
9 ruptures during delivery. *BJOG* 2001;**108**:383-7.  
10  
11 27. Räisänen S, Vehviläinen-Julkunen K, Gissler M, et al. Hospital-based lateral episiotomy  
12  
13 and obstetric anal sphincter injury rates: a retrospective population-based register study.  
14  
15 *Am J Obstet Gynecol* 2012;**206**:347.e1,347.e6.  
16  
17 28. Zafran N, Salim R. Impact of liberal use of mediolateral episiotomy on the incidence of  
18  
19 obstetric anal sphincter tear. *Arch Gynecol Obstet* 2012;.  
20  
21  
22 29. Williams A, Tincello DG, White S, et al. Risk scoring system for prediction of obstetric  
23  
24 anal sphincter injury. *BJOG* 2005;**112**:1066-9.  
25  
26  
27 30. Harkin R, Fitzpatrick M, O'Connell PR, et al. Anal sphincter disruption at vaginal  
28  
29 delivery: is recurrence predictable?. *Eur J Obstet Gynecol Reprod Biol* 2003;**109**:149-52.  
30  
31  
32 31. Varma A, Gunn J, Lindow SW, et al. Do routinely measured delivery variables predict  
33  
34 anal sphincter outcome?. *Dis Colon Rectum* 1999;**42**:1261-4.  
35  
36  
37  
38  
39  
40  
41  
42  
43  
44  
45  
46  
47  
48  
49  
50  
51  
52  
53  
54  
55  
56  
57  
58  
59  
60

## Introduction

Obstetric anal sphincter injury is a serious maternal complication during a vaginal delivery with reported incidences varying from 1 to 6% ,[1-5], and occurs even in otherwise uncomplicated deliveries. Obstetric anal sphincter injuries (OASIS) may cause pain, discomfort and anal incontinence (AI) ,[6-8].

Risk factors for OASIS have been widely studied, with several hundred studies presently available in PubMed, assessing maternal, obstetric and fetal risk factors. Numerous factors have been investigated and focus has often been on factors that are not modifiable, such as maternal age, height, weight, ethnicity, fetal weight and head size. Most previous studies conclude that primiparity, large infant birth weight and instrumental delivery increase the risk of OASIS, but when exploring factors such as maternal age (young or advanced), ethnicity, epidural use and episiotomy, the results are conflicting ,[9-14]. Risk factors unrelated to the delivering woman or the infant size, such as the accoucheurs' management of the second stage of delivery, have been less investigated.

The incidence of OASIS varies between countries and delivery units ,[2-5, 15]. A steadily increasing incidence of OASIS has been reported in the Nordic countries over the last decades ,[2, 5, 15, 16], albeit still at a very low rate in Finland ,[2]. Factors such as alterations in patient population over time (increasing maternal age, larger infants and increased use of instrumental delivery) have been studied, but such factors cannot alone explain the increasing incidence of OASIS ,[5, 15].

In 2004 the Norwegian National Board of Health criticized the delivery units for a high incidence of OASIS, at that time being 4.5% of vaginal deliveries, and required that hospitals should implement programs to reduce the OASIS incidence. Programs to introduce manual perineal protection in the second stage of delivery were implemented in many Norwegian hospitals, and a reduction in OASIS incidence was achieved ,[17, 18]. In the

1  
2  
3 Obstetric Department at Oslo University Hospital, Ullevål, attempts to reduce the incidence of  
4  
5 OASIS were developed in steps, starting in 2006 with more focus on the OASIS issue in  
6  
7 clinical meetings, whereas practical training to improve protection of perineum during second  
8  
9 stage of delivery started in 2008. Such training programmes have previously been described  
10  
11 in two studies ,[17, 18].  
12  
13

14 The primary aim of the present study was to compare the incidence of OASIS across  
15  
16 two time periods, before and after implementing a training program for perineal protection  
17  
18 during second stage of delivery, aimed at reducing the incidence of OASIS. A secondary aim  
19  
20 was to study the incidence of OASIS in subgroups of women defined by risk factors.  
21  
22

## 23 **Methods**

24  
25 The study was conducted as a retrospective cohort study, in the largest delivery unit in  
26  
27 Norway, at a university hospital with an unselected patient population in Oslo, with 7000  
28  
29 deliveries annually. Two cohorts from two time periods were studied, 2003-2005 and 2008-  
30  
31 2010, before and after the intervention of a training program for manual perineal protection  
32  
33 during the second stage of delivery.  
34  
35  
36  
37  
38  
39

## 40 **Databases and participants**

41  
42 Data was obtained from the hospital obstetric database, the electronic hospital discharge  
43  
44 register, individual electronic and paper-based medical records, and from the manually  
45  
46 assembled labour protocols at the delivery unit, during the time period from 2003 to 2010.  
47  
48

49 Two cohorts were chosen to the study, 2003-2005 and 2008-2010.  
50

51 Women with obstetric anal sphincter injuries were identified from the labour protocols  
52  
53 at the delivery unit and validated against individual electronic and paper-based medical charts  
54  
55 (by the first author: KL). Surgery notes for the perineum repair in the medical record for each  
56  
57 case were carefully read, and false positive cases were excluded (n=22). In addition, patients  
58  
59  
60

1  
2  
3 with the diagnosis OASIS (ICD-10 code O70.2 or O70.3) were identified from the electronic  
4  
5 hospital discharge register and 13 additional patients with OASIS were identified. After  
6  
7 excluding women delivered with caesarean section, preterm deliveries (< week 32), triplets  
8  
9 and quadruplets, the study population comprised 31 709 deliveries, of which 907 women with  
10  
11 OASIS.  
12

### 13 14 15 16 **Definition and diagnostics of OASIS**

17  
18 Obstetric anal sphincter injury was defined as any degree of injury in the anal sphincter  
19  
20 muscle (3A, 3B, 3C and 4<sup>th</sup> degree perineal tears, identified by the diagnoses O70.2 and  
21  
22 O70.3 in the ICD-10 system) ,[19].  
23

24  
25 In Norway, spontaneous deliveries are attended by midwives whereas instrumental  
26  
27 deliveries are handled by physicians. To increase safety during delivery for both the mother  
28  
29 and the infant, the procedure at our department requires at least two accoucheurs (two  
30  
31 midwives or one midwife and a physician) attending the second and third stage of each  
32  
33 delivery. If the midwife suspects OASIS, a physician attends the labour room and evaluates  
34  
35 and classifies the degree of perineal tear. The written procedure of the department is that a  
36  
37 standardized surgical OASIS repair (end-to-end technique) is always performed under direct  
38  
39 surveillance of an experienced obstetrician or gynecologist (consultant).  
40  
41  
42  
43  
44

### 45 **Risk factors for OASIS**

46  
47 Information on maternal, obstetrical and fetal risk factors for OASIS was collected, including  
48  
49 maternal age, parity, year of delivery, labour induction, delivery method, duration of second  
50  
51 stage of labour, epidural use, episiotomy, persistent occiput posterior presentation, shoulder  
52  
53 dystocia, infant birth weight and infant head circumference.  
54  
55  
56  
57  
58  
59  
60

### The intervention programme

The need to reduce the incidence of OASIS was discussed among delivery personnel in clinical meetings from 2006. An intervention programme was implemented from 2008, including both midwives and physicians at the Department of Obstetrics and Gynaecology. An external midwife was hired in from another hospital (where a similar programme was previously successfully implemented) to educate a group of trainer-midwives, who then further educated the entire midwife-staff. Physicians (both registrars and specialists) were educated in the perineal supporting technique and supervised by the first author (KL). First part of the training included a practical hands-on training on a pelvic delivery model and the second part included hands-on supervision in labour room during the second stage of delivery. The perineum protection programme consisted of four components during the last part of second stage of delivery, when the baby's head is crowning: slowing the delivery of the baby's head with one hand, supporting perineum with the other hand and squeezing with fingers (first and second) from the perineum lateral parts towards the middle in order to lower the pressure in middle posterior perineum, and asking the delivering woman not to push. The fourth part of the intervention was education in correct performing of episiotomy. At our department, episiotomy is performed only when indicated, for example due to fetal distress or imminent severe perineal tear. The main focus of this intervention step was to avoid median cuts of episiotomy technique, when performed, due to the augmented risk of OASIS associated with median episiotomies,[20].

### Comparison of groups

The clinical characteristics of the study participants in the first (2003-2005) and second (2008-2010) time period were compared in order to identify possible population differences of delivering women between the two time periods (Table 1).

Table 1 Clinical characteristics and obstetric interventions for the whole study population.

Data are presented in frequencies (and numbers). *P*-values from Chi-square test.

| Time period                                | Primiparous women |               | Multiparous women |               |
|--------------------------------------------|-------------------|---------------|-------------------|---------------|
|                                            | 2003-05           | 2008-10       | 2003-05           | 2008-10       |
| n vaginal deliveries                       | n=8051            | n=8837        | n=6736            | n=8085        |
| <b>Risk factors</b>                        |                   |               |                   |               |
| <b>Age, years</b>                          | <i>P</i> <0.001   |               | <i>P</i> <0.001   |               |
| 15-29                                      | 48.3 (n=3885)     | 43.8 (n=3872) | 27.4 (n=1849)     | 21.4 (n=1730) |
| 30-34                                      | 39.3 (n=3164)     | 40.8 (n=3604) | 42 (n=2823)       | 40.7 (n=3287) |
| 35-51                                      | 12.4 (n=1002)     | 15.4 (n=1361) | 30.6 (n=2064)     | 37.9 (n=3068) |
| <b>Birthweight, grams</b>                  | <i>P</i> =0.003   |               | <i>P</i> =0.60    |               |
| 720-2999                                   | 16.4 (n=1321)     | 16.4 (n=1446) | 11.8 (n=794)      | 11.6 (n=938)  |
| 3000-3499                                  | 37.9 (n=3050)     | 39.2 (n=3470) | 32.5 (n=2191)     | 32.0 (n=2591) |
| 3500-3999                                  | 33.2 (n=2670)     | 33.8 (n=2983) | 36.3 (n=2447)     | 37.5 (n=3029) |
| 4000-4499                                  | 11.0 (n=885)      | 9.3 (n=821)   | 15.6 (n=1049)     | 15.4 (n=1247) |
| 4500-5850                                  | 1.5 (n=125)       | 1.3 (n=117)   | 3.8 (n=255)       | 3.5 (n=280)   |
| <b>Delivery method</b>                     | <i>P</i> <0.001   |               | <i>P</i> =0.45    |               |
| Spontaneous                                | 81.5 (n=6558)     | 78.3 (n=6918) | 96.2 (n=6479)     | 96.4 (n=7793) |
| Ventouse                                   | 16.5 (n=1331)     | 20.4 (n=1802) | 3.5 (n=234)       | 3.4 (n=273)   |
| Forceps                                    | 2.0 (n=162)       | 1.3 (n=117)   | 0.3 (n=23)        | 0.2 (n=19)    |
| <b>Episiotomy, all vaginal deliveries</b>  | <i>P</i> <0.001   |               | <i>P</i> =0.066   |               |
|                                            | 31.4 (n=2528)     | 36.2 (n=3203) | 7.3 (n=492)       | 8.1 (n=656)   |
| <b>Episiotomy, spontaneous deliveries</b>  | <i>P</i> =0.006   |               | <i>P</i> =0.98    |               |
|                                            | 24.7 (n=1620)     | 22.7 (n=1569) | 6.1 (n=396)       | 6.1 (n=477)   |
| <b>Episiotomy, instrumental deliveries</b> | <i>P</i> <0.001   |               | <i>P</i> <0.001   |               |
|                                            | 60.8 (n=908)      | 85.1 (n=1634) | 37.4 (n=96)       | 61.3 (n=179)  |

1  
2  
3  
4  
5  
6  
7  
8  
9  
10  
11  
12  
13  
14  
15  
16  
17  
18  
19  
20  
21  
22  
23  
24  
25  
26  
27  
28  
29  
30  
31  
32  
33  
34  
35  
36  
37  
38  
39  
40  
41  
42  
43  
44  
45  
46  
47  
48  
49  
50  
51  
52  
53  
54  
55  
56  
57  
58  
59  
60

| Duration 2 <sup>nd</sup> stage, min | <i>P</i> =0.057 |               | <i>P</i> =0.45 |               |
|-------------------------------------|-----------------|---------------|----------------|---------------|
| 0-29                                | 34.1 (n=2736)   | 32.5 (n=2864) | 84.9 (n=5696)  | 85.4 (n=6895) |
| 30-59                               | 41.0 (n=3290)   | 41.6 (n=3673) | 12.5 (n=839)   | 11.9 (n=957)  |
| 60-205                              | 24.9 (n=1994)   | 25.9 (n=2288) | 2.6 (n=174)    | 2.7 (n=219)   |

### Statistical analysis

Incidence of obstetric anal sphincter injuries was calculated from vaginal deliveries only and the data were stratified according to parity. Parity was adjusted to vaginal parity; women with one previous caesarean delivery only (never having delivered vaginally before) were categorized as “vaginal primiparous” (n=440).

**The risk factors for OASIS were calculated and presented separately for the two cohorts.**

Continuous data were categorised and the independent variables are presented as frequencies.

Univariate analysis was performed to explore the significant risk factors. Variables **with  $P \leq 0.10$**  were included in the multivariate analysis. Univariate analyses were performed by Chi-square test. A significance level of 5% was chosen in all analyses. Adjusted odds ratios (aORs) for OASIS with 95% CI are reported from multivariate logistic regression analyses.

The data were analyzed by using PASW (Predictive Analytics SoftWare, SPSS Inc., version 19.0, Chicago, IL).

### Results

Overall incidence of anal sphincter injury in vaginal deliveries was significantly reduced by 50%, from 4.0% (591/14787) in the first time period (2003-5) to 1.9% (316/16922) in the second time period (2008-10). The reduction of the incidence of OASIS was of similar magnitude across all studied subgroups defined by risk factors, for both primi- and multiparous women (Table 2).

Table 2 Incidence of OASIS in different subgroups of women. Data are presented in frequencies (and numbers). *P*-values from Chi-square test.

| Time period                               | Primiparous women |                | Multiparous women |                |               |          |
|-------------------------------------------|-------------------|----------------|-------------------|----------------|---------------|----------|
|                                           | 2003-05           | 2008-10        |                   | 2003-05        | 2008-10       |          |
| OASIS                                     | 6.1 (489/8051)    | 3.0 (263/8837) |                   | 1.5 (102/6736) | 0.7 (53/8085) |          |
| <b>Risk factors</b>                       |                   |                |                   |                |               |          |
| Age, years                                |                   |                | <i>P</i>          |                |               | <i>P</i> |
| 15-29                                     | 5.5 (212/3885)    | 2.8 (107/3872) | <0.001            | 1.4 (25/1849)  | 0.5 (9/1730)  | 0.01     |
| 30-34                                     | 6.7 (212/3164)    | 3.3 (118/3604) | <0.001            | 1.6 (45/2823)  | 0.7 (22/3287) | 0.001    |
| 35-51                                     | 6.5 (65/1002)     | 2.8 (38/1361)  | <0.001            | 1.6 (32/2064)  | 0.7 (22/3068) | 0.004    |
| <b>Birthweight, grams</b>                 |                   |                |                   |                |               |          |
| 720-2999                                  | 3.0 (39/1321)     | 1.6 (23/1446)  | 0.016             | 0.4 (3/794)    | 0.5 (5/938)   | 0.63     |
| 3000-3499                                 | 4.4 (135/3050)    | 2.6 (90/3470)  | <0.001            | 0.8 (18/2191)  | 0.4 (10/2591) | 0.049    |
| 3500-3999                                 | 7.2 (192/2670)    | 3.4 (101/2983) | <0.001            | 1.3 (33/2447)  | 0.6 (19/3029) | 0.006    |
| 4000-4499                                 | 11.2 (99/885)     | 4.8 (39/821)   | <0.001            | 3.2 (34/1049)  | 0.7 (9/1247)  | <0.001   |
| 4500-5850                                 | 19.2 (24/125)     | 8.5 (10/117)   | 0.017             | 5.5 (14/255)   | 3.6 (10/280)  | 0.28     |
| <b>Delivery method</b>                    |                   |                |                   |                |               |          |
| Spontaneous                               | 4.8 (318/6558)    | 2.5 (170/6918) | <0.001            | 1.4 (91/6479)  | 0.6 (45/7793) | <0.001   |
| Ventouse                                  | 10.8 (144/1331)   | 5.0 (90/1802)  | <0.001            | 3.4 (8/234)    | 2.9 (8/273)   | 0.75     |
| Forceps                                   | 16.7 (27/162)     | 2.6 (3/117)    | <0.001            | 13.0 (3/23)    | 0 (0/19)      | 0.10     |
| <b>Episiotomy, all deliveries</b>         |                   |                |                   |                |               |          |
| Yes                                       | 6.6 (166/2528)    | 3.0 (96/3203)  | <0.001            | 2.0 (10/492)   | 1.8 (12/656)  | 0.80     |
| No                                        | 5.8 (323/5523)    | 3.0 (167/5634) | <0.001            | 1.5 (92/6244)  | 0.6 (41/7429) | <0.001   |
| <b>Episiotomy, spontaneous deliveries</b> |                   |                |                   |                |               |          |
| Yes                                       | 4.0 (65/1620)     | 2.2 (34/1569)  | <0.003            | 1.3 (5/396)    | 1.3 (6/477)   | 1.00     |



|                                            |                |                |        |                |               |        |
|--------------------------------------------|----------------|----------------|--------|----------------|---------------|--------|
| No                                         | 5.1 (253/4938) | 2.5 (136/5349) | <0.001 | 1.4 (86/6083)  | 0.5 (39/7316) | <0.001 |
| <b>Episiotomy, instrumental deliveries</b> |                |                |        |                |               |        |
| Yes                                        | 11.1 (101/908) | 3.8 (62/1634)  | <0.001 | 5.2 (5/96)     | 3.4 (6/179)   | 0.45   |
| No                                         | 12.0 (70/585)  | 10.9 (31/285)  | 0.64   | 3.7 (6/161)    | 1.8 (2/113)   | 0.34   |
| <b>Duration 2<sup>nd</sup> stage, min</b>  |                |                |        |                |               |        |
| 0-09                                       | 4.6 (13/281)   | 3.3 (9/273)    | 0.42   | 0.9 (20/2335)  | 0.4 (10/2390) | 0.058  |
| 10-29                                      | 4.0 (99/2455)  | 2.9 (74/2591)  | 0.02   | 1.5 (50/3361)  | 0.5 (21/4505) | <0.001 |
| 30-59                                      | 5.5 (180/3290) | 2.5 (93/3673)  | <0.001 | 2.9 (24/839)   | 1.7 (16/957)  | 0.09   |
| 60-205                                     | 9.7 (193/1994) | 3.8 (87/2288)  | <0.001 | 4.0 (7/174)    | 2.3 (5/219)   | 0.32   |
| <b>Epidural</b>                            |                |                |        |                |               |        |
| Yes                                        | 6.5 (228/3494) | 3.0 (128/4267) | <0.001 | 2.0 (20/1008)  | 0.8 (12/1419) | 0.015  |
| No                                         | 5.7 (261/4557) | 3.0 (135/4570) | <0.001 | 1.4 (82/5728)  | 0.6 (41/6666) | <0.001 |
| <b>Shoulder dystocia</b>                   |                |                |        |                |               |        |
| Yes                                        | 15.8 (12/76)   | 14.1 (9/64)    | 0.78   | 5.7 (5/87)     | 4.1 (3/73)    | 0.64   |
| No                                         | 6.0 (477/7975) | 2.9 (254/8773) | <0.001 | 1.5 (97/6649)  | 0.6 (50/8012) | <0.001 |
| <b>Occiput posterior presentation</b>      |                |                |        |                |               |        |
| Yes                                        | 11.4 (20/176)  | 6.9 (17/245)   | 0.11   | 0.7 (1/150)    | 1.7 (4/237)   | 0.39   |
| No                                         | 6.0 (469/7875) | 2.9 (246/8592) | <0.001 | 1.5 (101/6586) | 0.6 (49/7848) | <0.001 |
| <b>Induced labour</b>                      |                |                |        |                |               |        |
| Yes                                        | 5.5 (75/1365)  | 3.0 (50/1650)  | 0.001  | 1.3 (12/903)   | 0.7 (9/1269)  | 0.18   |
| No                                         | 6.2 (414/6686) | 3.0 (213/7187) | <0.001 | 1.5 (90/5833)  | 0.6 (44/6816) | <0.001 |

The incidence of OASIS over the study years is displayed in Figure 1, demonstrating a reduced incidence of OASIS, which in time follows the implementation of the perineum support program for the staff. Figure 1 also demonstrates a similar reduction of OASIS

incidence for the different delivery methods (operative and spontaneous vaginal delivery) between the two study periods: in spontaneous deliveries the OASIS incidence was reduced from 3.1% (409/13037) to 1.5% (215/14711) and in ventouse from 9.7% (152/1565) to 4.7% (98/2075). Forceps is less used in our department, but a significant OASIS reduction was also observed in forceps deliveries from 16.2% (30/185) to 2.2% (3/136).

### Population characteristics across the study years

Overall changes in population characteristics between the two time periods were small, but the prevalence of older women (>35 years) was significantly higher in the second period (2008-10), and use of ventouse delivery, episiotomy, epidural and induction of labour was more frequent (Table 1). Primiparous women comprised 85% of the women with OASIS, but represented only 53.3 % of the overall study population.

### Primiparous women

In a univariate analysis, higher infant birth weight, larger infant head circumference (data not shown), prolonged second stage of labour, instrumental delivery, shoulder dystocia and persistent occiput posterior presentation were significant OASIS risk factors for primiparous women in the first study period (Table 3). In the second study period, the same OASIS risk factors remained significant, except for prolonged second stage of labour (Table 3).

Table 3 Clinical characteristics and obstetric interventions among primiparous women with OASIS and women without OASIS. Data are presented in frequencies (and numbers).

*P*-values from Chi-square test.

| Primiparous women | 2003-05 |           | 2008-10 |           |
|-------------------|---------|-----------|---------|-----------|
|                   | OASIS   | Non-OASIS | OASIS   | Non-OASIS |
| n deliveries      | n=489   | n=7562    | n=263   | n=8574    |

|    |                                           |                 |               |                 |               |
|----|-------------------------------------------|-----------------|---------------|-----------------|---------------|
| 1  |                                           |                 |               |                 |               |
| 2  |                                           |                 |               |                 |               |
| 3  | Incidence OASIS                           | 6.1 (489/7562)  |               | 3.0 (263/8574)  |               |
| 4  |                                           |                 |               |                 |               |
| 5  | <b>Risk factors</b>                       | %               |               | %               |               |
| 6  |                                           |                 |               |                 |               |
| 7  | Age, years                                | <i>P</i> =0.08  |               | <i>P</i> =0.39  |               |
| 8  |                                           |                 |               |                 |               |
| 9  | 15-29                                     | 43.4 (n=212)    | 48.6 (n=3673) | 40.7 (n=107)    | 43.9 (n=3765) |
| 10 |                                           |                 |               |                 |               |
| 11 | 30-34                                     | 43.4 (n=212)    | 39 (n=2952)   | 44.9 (n=118)    | 40.7 (n=3486) |
| 12 |                                           |                 |               |                 |               |
| 13 | 35-51                                     | 13.3 (n=65)     | 12.4 (n=937)  | 14.4 (n=38)     | 15.4 (n=1323) |
| 14 |                                           |                 |               |                 |               |
| 15 | <b>Birthweight, grams</b>                 | <i>P</i> <0.001 |               | <i>P</i> <0.001 |               |
| 16 |                                           |                 |               |                 |               |
| 17 | 720-2999                                  | 8.0 (n=39)      | 17.0 (n=1282) | 8.7 (n=23)      | 16.6 (n=1423) |
| 18 |                                           |                 |               |                 |               |
| 19 | 3000-3499                                 | 27.6 (n=135)    | 38.5 (n=2915) | 34.2 (n=90)     | 39.4 (n=3380) |
| 20 |                                           |                 |               |                 |               |
| 21 | 3500-3999                                 | 39.3 (n=192)    | 32.8 (n=2478) | 38.4 (n=101)    | 33.6 (n=2882) |
| 22 |                                           |                 |               |                 |               |
| 23 | 4000-4499                                 | 20.2 (n=99)     | 10.4 (n=786)  | 14.8 (n=39)     | 9.1 (n=782)   |
| 24 |                                           |                 |               |                 |               |
| 25 | 4500-5850                                 | 4.9 (n=24)      | 1.3 (n=101)   | 3.8 (n=10)      | 1.2 (n=107)   |
| 26 |                                           |                 |               |                 |               |
| 27 | <b>Delivery method</b>                    | <i>P</i> <0.001 |               | <i>P</i> <0.001 |               |
| 28 |                                           |                 |               |                 |               |
| 29 | Spontaneous                               | 65.0 (n=318)    | 82.5 (n=6240) | 64.6 (n=170)    | 78.7 (n=6748) |
| 30 |                                           |                 |               |                 |               |
| 31 | Ventouse                                  | 29.4 (n=144)    | 15.7 (n=1187) | 34.2 (n=90)     | 20.0 (n=1712) |
| 32 |                                           |                 |               |                 |               |
| 33 | Forceps                                   | 5.5 (n=27)      | 1.8 (n=135)   | 1.1(n=3)        | 1.3(n=114)    |
| 34 |                                           |                 |               |                 |               |
| 35 | <b>Episiotomy, all vaginal deliveries</b> | <i>P</i> =0.21  |               | <i>P</i> =0.93  |               |
| 36 |                                           |                 |               |                 |               |
| 37 |                                           | 33.9 (n=166)    | 31.2 (n=2362) | 36.5 (n=96)     | 36.2 (n=3107) |
| 38 |                                           |                 |               |                 |               |
| 39 | <b>Episiotomy, spontaneous deliveries</b> | <i>P</i> =0.07  |               | <i>P</i> =0.40  |               |
| 40 |                                           |                 |               |                 |               |
| 41 |                                           | 20.4 (n=65)     | 24.9 (n=1555) | 20.0 (n=34)     | 22.7 (n=1535) |
| 42 |                                           |                 |               |                 |               |
| 43 | <b>Episiotomy, instrumental</b>           | <i>P</i> <0.001 |               | <i>P</i> <0.001 |               |
| 44 |                                           |                 |               |                 |               |
| 45 | <b>deliveries</b>                         | 59.1 (n=101)    | 61.0 (n=807)  | 66.7 (n=62)     | 86.1 (n=1572) |
| 46 |                                           |                 |               |                 |               |
| 47 | <b>Duration 2<sup>nd</sup> stage, min</b> | <i>P</i> <0.001 |               | <i>P</i> =0.07  |               |
| 48 |                                           |                 |               |                 |               |
| 49 | 0-09                                      | 2.7 (n=13)      | 3.5 (n=268)   | 3.4 (n=9)       | 3.1 (n=264)   |
| 50 |                                           |                 |               |                 |               |
| 51 | 10-29                                     | 20.2 (n=99)     | 31.2 (n=2356) | 28.1 (n=74)     | 29.4 (n=2517) |
| 52 |                                           |                 |               |                 |               |
| 53 | 30-59                                     | 36.8 (n=180)    | 41.1 (n=3110) | 35.4 (n=93)     | 41.8 (n=3580) |
| 54 |                                           |                 |               |                 |               |
| 55 | 60-205                                    | 39.5 (n=193)    | 23.8 (n=1801) | 33.1 (n=87)     | 25.7 (n=2201) |
| 56 |                                           |                 |               |                 |               |
| 57 |                                           |                 |               |                 |               |
| 58 |                                           |                 |               |                 |               |
| 59 |                                           |                 |               |                 |               |
| 60 |                                           |                 |               |                 |               |

|                                       |                 |               |                 |               |
|---------------------------------------|-----------------|---------------|-----------------|---------------|
| Missing data (n=4/n=27)               | 0.8 (n=4)       | 0.4 (n=27)    | 0 (n=0)         | 0.1 (n=12)    |
| <b>Epidural</b>                       | <i>P</i> =0.14  |               | <i>P</i> =0.90  |               |
|                                       | 46.6 (n=228)    | 43.2 (n=3266) | 48.7 (n=128)    | 48.3 (n=4139) |
| <b>Shoulder dystocia</b>              | <i>P</i> <0.001 |               | <i>P</i> <0.001 |               |
|                                       | 2.5 (n=12)      | 0.8 (n=64)    | 3.4 (n=9)       | 0.6 (n=55)    |
| <b>Occiput posterior presentation</b> | <i>P</i> =0.003 |               | <i>P</i> <0.001 |               |
|                                       | 4.1 (n=20)      | 2.1 (n=156)   | 6.5 (n=17)      | 2.7 (n=228)   |
| <b>Induced labour</b>                 | <i>P</i> =0.32  |               | <i>P</i> =0.89  |               |
|                                       | 15.3 (n=75)     | 17.1 (n=1290) | 19.0 (n=50)     | 18.7 (n=18.7) |

Looking at the various explanatory variables (such as age, maternal BMI, fetal weight etc) and analyzing time period solely as an explanatory variable for OASIS (due to the perineal protection programme introduced in the second time period), we observed that the first time period emerged as one of the most important “risk factors” with high OR for OASIS in our study. Without adjusting for any other variables, OR for OASIS in the logistic regression analysis for the first study period as compared to the second was 2.10 (95% CI 1.76 to 2.40).

In a multivariate regression analysis (Table 4), large infant birth weight, instrumental delivery, prolonged second stage and occiput posterior presentation were significant risk factors for OASIS in the first study period. In the second study period, when the incidence of OASIS was reduced, only instrumental delivery and fetal occiput posterior presentation remained significant risk factors for OASIS.

Table 4 Risk factors for OASIS in the multivariate regression model (adjusted odds ratio (aOR) and 95% confidence intervals).

**Primiparous women**

**Multiparous women**

| Time period                               | 2003-05             | 2008-10             | 2003-05             | 2008-10             |
|-------------------------------------------|---------------------|---------------------|---------------------|---------------------|
| n vaginal deliveries                      | n=8051              | n=8837              | n=6736              | n=8085              |
| n OASIS                                   | 489                 | 263                 | 102                 | 53                  |
| Incidence OASIS                           | 6.0 %               | 3.0%                | 1.5%                | 0.7%                |
| <b>Risk factors</b>                       | aOR (95% CI)        | aOR (95% CI)        | aOR (95% CI)        | aOR (95% CI)        |
| <b>Age, years</b>                         |                     |                     |                     |                     |
| 15-29                                     | 0.90 (0.72 to 1.08) | 0.90 (0.67 to 1.15) | 0.99 (0.60 to 1.64) | 0.86 (0.40 to 1.90) |
| 30-34                                     | 1                   | 1                   | 1                   | 1                   |
| 35-51                                     | 0.96 (0.71 to 1.28) | 0.84 (0.58 to 1.22) | 0.91 (0.57 to 1.44) | 0.95 (0.52 to 1.75) |
| <b>Birthweight, grams</b>                 |                     |                     |                     |                     |
| 720-3499                                  | 0.70 (0.55 to 0.87) | 0.80 (0.60 to 1.08) | 0.46 (0.25 to 0.82) | 0.93 (0.44 to 1.94) |
| 3500-3999                                 | 1                   | 1                   | 1                   | 1                   |
| 4000-5850                                 | 1.50 (1.16 to 1.92) | 1.26 (0.87 to 1.83) | 2.81 (1.73 to 4.58) | 1.19 (0.58 to 2.45) |
| <b>Delivery method</b>                    |                     |                     |                     |                     |
| Spontaneous                               | 1                   | 1                   | 1                   | 1                   |
| Instrumental                              | 2.10 (1.71 to 2.68) | 2.46 (1.74 to 3.47) | 2.19 (1.02 to 4.73) | 1.72 (0.64 to 4.66) |
| <b>Episiotomy</b>                         |                     |                     |                     |                     |
| No                                        | 1                   | 1                   | 1                   | 1                   |
| Yes                                       | 0.72 (0.58 to 0.90) | 0.52 (0.38 to 0.73) | 0.92 (0.46 to 1.87) | 1.57 (0.71 to 3.49) |
| <b>Duration 2<sup>nd</sup> stage, min</b> |                     |                     |                     |                     |
| 0-29                                      | 0.80 (0.62 to 1.02) | 1.18 (0.87 to 1.60) | 0.50 (0.31 to 0.82) | 0.34 (0.18 to 0.64) |
| 30-59                                     | 1                   | 1                   | 1                   | 1                   |
| 60-205                                    | 1.40 (1.15 to 1.79) | 1.29 (0.95 to 1.75) | 1.03 (0.41 to 2.58) | 0.83 (0.28 to 2.48) |
| <b>Epidural</b>                           |                     |                     |                     |                     |
| No                                        | 1                   | 1                   | 1                   | 1                   |
| Yes                                       | 0.95 (0.78 to 1.15) | 0.86 (0.67 to 1.12) | 1.15 (0.69 to 1.93) | 0.88 (0.44 to 1.76) |
| <b>Shoulder dystocia</b>                  |                     |                     |                     |                     |

|                                       |                     |                     |                     |                      |
|---------------------------------------|---------------------|---------------------|---------------------|----------------------|
| No                                    | 1                   | 1                   | 1                   | 1                    |
| Yes                                   | 1.58 (0.83 to 1.39) | 3.73 (1.76 to 7.90) | 1.58 (0.60 to 4.16) | 2.25 (0.50 to 10.10) |
| <b>Occiput posterior presentation</b> |                     |                     |                     |                      |
| No                                    | 1                   | 1                   | 1                   | 1                    |
| Yes                                   | 1.72 (1.04 to 2.82) | 2.40 (1.42 to 4.06) | 0.24 (0.03 to 1.78) | 1.95 (0.66 to 5.73)  |
| <b>Induced labour</b>                 |                     |                     |                     |                      |
| No                                    | 1                   | 1                   | 1                   | 1                    |
| Yes                                   | 0.77 (0.60 to 1.00) | 0.92 (0.66 to 1.27) | 0.86 (0.46 to 1.60) | 0.81 (0.37 to 1.77)  |

Frequency of episiotomy use in spontaneous deliveries of primiparous women was reduced from the first time period to the second, and increased in instrumental deliveries (Table 1). When adjusted for risk factors in the multivariate analysis, episiotomy appeared as a protective factor for OASIS in both time periods for primiparous women (Table 4).

Primiparous women with a previous caesarean section only, and no previous vaginal delivery (n=440), had an increased OASIS risk compared to women with no previous delivery OR=2.2 (95% CI 1.6 to 3.1), both in the first time period (11.5% and 5.9%, respectively,  $P=0.001$ ) and in the second (6.7% and 2.9%, respectively,  $P=0.001$ ). Also in this subgroup, the OASIS incidence was reduced with 50% after implementation of the perineal protection programme. When the various study analyses were performed without this small subgroup of vaginal primiparous women with one previous caesarean only, the study conclusions remained unaltered, as expected due to the small number of women in this subgroup.

### **Multiparous women**

In a univariate analysis for multiparous women (Table 5), instrumental delivery, prolonged second stage of delivery, shoulder dystocia, large infant head circumference (data not shown)

and birth weight were significant risk factors for OASIS in both time periods. The risk of OASIS was markedly reduced from the first to the second time period and the time period for the delivery was one of the most important “risk factors”; OR for OASIS in the logistic regression analysis for the first time period as compared to the second was 2.31 (95% CI 1.65 to 3.25).

Table 5 Clinical characteristics and obstetric interventions among multiparous women with OASIS and women without OASIS. Data are presented in frequencies (and numbers). *P*-values from Chi-square test.

| Multiparous women         | 2003-05         |               | 2008-10         |               |
|---------------------------|-----------------|---------------|-----------------|---------------|
|                           | OASIS           | Non-OASIS     | OASIS           | Non-OASIS     |
| n deliveries              | n=102           | n=6634        | n=53            | n=8032        |
| Incidence OASIS           | 1.5 (102/6634)  |               | 0.7 (53/8032)   |               |
| <b>Risk factors</b>       | %               |               | %               |               |
| Age, years                | <i>P</i> =0.79  |               | <i>P</i> =0.71  |               |
| 15-29                     | 24.5 (n=25)     | 27.5 (n=1824) | 17.0 (n=9)      | 21.4 (n=1721) |
| 30-34                     | 44.1 (n=45)     | 41.9 (n=2778) | 41.5 (n=22)     | 40.6 (n=3265) |
| 35-51                     | 31.4 (n=32)     | 30.6 (n=2032) | 41.5 (n=22)     | 37.9 (n=3046) |
| <b>Birthweight, grams</b> | <i>P</i> <0.001 |               | <i>P</i> <0.001 |               |
| 720-2999                  | 2.9 (n=3)       | 11.9 (n=791)  | 9.4 (n=5)       | 11.6 (n=933)  |
| 3000-3499                 | 17.6 (n=18)     | 32.8 (n=2173) | 18.9 (n=10)     | 32.1 (n=2581) |
| 3500-3999                 | 32.4 (n=33)     | 36.4 (n=2414) | 35.8 (n=19)     | 37.5 (n=3010) |
| 4000-4499                 | 33.3 (n=34)     | 15.3 (n=1015) | 17.0 (n=9)      | 15.4 (n=1238) |
| 4500-5850                 | 13.7 (n=14)     | 3.6 (n=241)   | 18.9 (n=10)     | 3.4 (n=270)   |
| <b>Delivery method</b>    | <i>P</i> <0.001 |               | <i>P</i> <0.001 |               |
| Spontaneous               | 89.2 (n=91)     | 96.3 (n=6388) | 84.9 (n=45)     | 96.5 (n=7748) |
| Ventouse                  | 7.8 (n=8)       | 3.4 (n=226)   | 15.1 (n=8)      | 3.3 (n=265)   |

|                                            |                 |               |                 |               |
|--------------------------------------------|-----------------|---------------|-----------------|---------------|
| Forceps                                    | 2.9 (n=3)       | 0.3 (n=20)    | 0 (n=0)         | 0.2 (n=19)    |
| <b>Episiotomy, all vaginal deliveries</b>  | <i>P</i> =0.33  |               | <i>P</i> <0.001 |               |
|                                            | 9.8 (n=10)      | 7.3 (n=482)   | 22.6 (n=12)     | 8.0 (n=644)   |
| <b>Episiotomy, spontaneous deliveries</b>  | <i>P</i> =0.80  |               | <i>P</i> =0.43  |               |
|                                            | 5.5 (n=5)       | 6.1 (n=391)   | 13.3 (n=6)      | 6.1 (n=471)   |
| <b>Episiotomy, instrumental deliveries</b> | <i>P</i> =0.57  |               | <i>P</i> =0.42  |               |
|                                            | 45.5 (n=5)      | 37.0 (n=91)   | 75 (n=6)        | 60.9 (n=173)  |
| <b>Duration 2<sup>nd</sup> stage, min</b>  | <i>P</i> <0.001 |               | <i>P</i> <0.001 |               |
| 0-09                                       | 19.6 (n=20)     | 34.9 (n=2315) | 18.9 (n=10)     | 29.6 (n=2380) |
| 10-29                                      | 49.0 (n=50)     | 49.9 (n=3311) | 39.6 (n=21)     | 55.8 (n=4484) |
| 30-59                                      | 23.5 (n=24)     | 12.3 (n=815)  | 30.2 (n=16)     | 11.7 (n=941)  |
| 60-205                                     | 6.9 (n=7)       | 2.5 (n=167)   | 9.4 (n=5)       | 2.7 (n=214)   |
| Missing data (n=4/n=27)                    | 1.0 (n=1)       | 0.4 (n=26)    | 1.9 (n=1)       | 0.2 (n=13)    |
| <b>Epidural</b>                            | <i>P</i> =0.21  |               | <i>P</i> =0.36  |               |
|                                            | 19.6 (n=20)     | 14.9 (n=988)  | 22.6 (n=12)     | 17.5 (n=1407) |
| <b>Shoulder dystocia</b>                   | <i>P</i> =0.001 |               | <i>P</i> <0.001 |               |
|                                            | 4.9 (n=5)       | 1.2 (n=82)    | 5.7 (n=3)       | 0.9 (n=70)    |
| <b>Occiput posterior presentation</b>      | <i>P</i> =0.39  |               | <i>P</i> =0.046 |               |
|                                            | 1.0 (n=1)       | 2.2 (n=149)   | 7.5 (n=4)       | 2.9 (n=233)   |
| <b>Induced labour</b>                      | <i>P</i> =0.62  |               | <i>P</i> =0.80  |               |
|                                            | 11.8 (n=12)     | 13.4 (n=891)  | 17.0 (n=9)      | 15.7 (n=1260) |

In the multivariate regression analysis (Table 4), macrosomia and instrumental delivery significantly increased the OASIS risk for multiparous women in the first time period, but not in the second. In the second time period, none of the identified risk factors for OASIS were significant for multiparous women. However, OASIS cases were few (n=53) in this subgroup of women. In the multivariate analysis the effect of episiotomy was non-



1  
2  
3 significant in both time periods (Table 4). However, multiparous women with episiotomy  
4  
5 were very few in this study and interpretation of the results should be undertaken cautiously  
6  
7 (Table 2 and 5).  
8  
9

## 10 11 12 **Discussion**

13  
14 In this study, comprising 31 709 vaginal deliveries, the OASIS incidence was reduced by 50%  
15  
16 after introduction of a training program on perineal protection during the second stage of  
17  
18 delivery, aimed at reducing incidence of OASIS. The reduction in the OASIS incidence was  
19  
20 similar in all subgroups defined by OASIS risk factors.  
21  
22

23 **Similar reduction in OASIS following alteration in clinical routines and intervention**  
24 **programmes during the second stage of delivery have been presented previously, both in**  
25 **Norway,[17, 18] and in the US ,[21], but we are not aware of other publications exploring the**  
26 **reduced incidence of OASIS in different subgroups defined by risk factors.**  
27  
28  
29  
30  
31  
32

## 33 34 **Strengths and limitations of the study**

35  
36 Strengths of this hospital-based large observational study includes a very low risk of  
37  
38 diagnostic misclassification of the OASIS outcome as all OASIS diagnoses were validated for  
39  
40 study purposes **in addition to primarily being diagnosed by at least two accoucheurs, and**  
41  
42 **always by an obstetrician or gynecologist.** This is in contrast to studies based on registries that  
43  
44 are not primarily created for research, but are established for other purposes for the health  
45  
46 care providers. In our study, the medical records of all patients registered with an OASIS were  
47  
48 carefully reviewed by one senior consultant (KL). In addition, **diagnosis of OASIS cases were**  
49  
50 **cross-checked between several** available sources (individual patient records, delivery unit  
51  
52 protocols and hospital discharge lists, including ICD-10 diagnose codes and **surgical** codes for  
53  
54 OASIS repair) for the study years. Another strength is that the study was carried out at in a  
55  
56  
57  
58  
59  
60

1  
2  
3 single large hospital focusing on improved quality of primary diagnosis and repair of OASIS,  
4  
5 and this also reduces the risk of **misclassification in registration**. Strength of the study is also  
6  
7 the unselected population of delivering women and a large number of deliveries.  
8

9  
10 A randomized controlled trial (RCT) would be the optimal design for evaluating a  
11  
12 OASIS reducing effect of manual perineum protection, but carrying out such an RCT is  
13  
14 challenging during delivery, due to contamination of methods in different study arms and  
15  
16 problems with blinding of patients or staff. **We did not conduct an RCT because in Norway,**  
17  
18 **several hospitals already had managed to reduce the incidence of OASIS with implementation**  
19  
20 **of improved manual perineal protection, and we consider randomizing women to hands-off**  
21  
22 **delivering techniques as unethical in the light of these recent historical clinical results.**  
23

24  
25 Previous RCTs have not shown a beneficial effect on OASIS by hands-on perineal protection,  
26  
27 but the published RCTs have not described a structured training of the staff, such as the  
28  
29 intervention programme of our study,[22]. These trials had problems with bias caused by  
30  
31 contamination of compared methods and different use of medial episiotomy in the study  
32  
33 arms,[23, 24], were under-powered to explore OASIS, or were not designed to assess OASIS,  
34  
35 but perineal pain or perineal injury in general (including 1<sup>st</sup> and 2<sup>nd</sup> degree tears and  
36  
37 episiotomy),[23-25]. The marked 50% reduction in the OASIS incidence obtained in our  
38  
39 delivery unit appeared simultaneously with the introduction of a manual perineal protection  
40  
41 during second stage of labour. The main difference for our study population between the two  
42  
43 time periods was the perineum protection training programme, **the patient characteristics**  
44  
45 **remained almost unaltered between the time periods and could not explain the reduction of**  
46  
47 **incidence of OASIS. Thus, our study indicates** that such a perineal protection programme has  
48  
49 a beneficial effect in reducing the incidence of OASIS, both for primiparous and multiparous  
50  
51 women, despite the lack of an RCT supporting this conclusion.  
52  
53  
54  
55  
56  
57  
58  
59  
60

1  
2  
3 A weakness of our study is that the use of perineum support method, if used during  
4 second stage of delivery, was not registered in the medical records, and therefore, use of  
5 perineum support could not be assessed directly in our retrospective study. However, if this  
6 method was not used in some deliveries during the second time period or was used in some  
7 deliveries during the first time period, our study would tend to underestimate the OASIS  
8 incidence reducing effect of the perineum protection intervention program, and hence, our  
9 efficacy estimates on reduction of OASIS from the intervention are minimum estimates.  
10  
11  
12  
13  
14  
15  
16  
17  
18  
19

### 20 **Meaning of the study**

21  
22 The observed reduction of incidence of OASIS came rapidly after the introduction of the  
23 perineal protection programme and the low incidence of OASIS has lasted over the last years.  
24  
25 The changes in clinical characteristics of the study population were very modest between the  
26 two time periods, and cannot explain the rapid reduction of the incidence of OASIS. Without  
27 the intervention programme, we could have expected an increase of the incidence of OASIS  
28 in the second time period, as one of the most important OASIS risk factors, instrumental  
29 delivery, became more frequent in the study population (Table 1) over the study years. In our  
30 study the reduction of incidence of OASIS was surprisingly consistent in all subgroups  
31 defined by OASIS risk factors (Table 2). The decrease of the incidence of OASIS was similar  
32 in spontaneous and operative deliveries and in parity groups (primiparous and multiparous),  
33 again surprising, as primiparity is one of the most important risk factors for OASIS, as is  
34 operative delivery,[5, 10, 15]. Interestingly, as shown in Figure 1, the 2010 incidence of  
35 OASIS in women delivered by ventouse delivery is of similar magnitude as the incidence of  
36 OASIS in the spontaneous deliveries was back in 2005 (3.6 and 3.8%, respectively).  
37  
38  
39  
40  
41  
42  
43  
44  
45  
46  
47  
48  
49  
50  
51  
52

53 Underreporting OASIS cases in the second time period is an unlikely cause for the  
54 registered reduction of the incidence of OASIS, as the procedure emphasizing more than one  
55  
56  
57  
58  
59  
60

1  
2  
3 accoucheur present at all deliveries was introduced before the second study period in form of  
4  
5 a written procedure. Caesarean rate was unaltered between the two study periods and cannot  
6  
7 explain the reduction of the incidence of OASIS.  
8  
9

### 10 11 **Comparison with other studies**

12  
13 Traditionally, there has been a focus on OASIS risk factors with high OR. However, such risk  
14  
15 factors may not necessarily represent the most frequent events in a delivery unit. Shoulder  
16  
17 dystocia and occiput posterior presentation are examples of risk factors with high OR and a  
18  
19 very low incidence,[5, 15]. In numbers, most of the OASIS occurs during deliveries with low  
20  
21 risk; during spontaneous deliveries with an infant of normal size. In our study, the number of  
22  
23 women with OASIS illustrates the major groups of women that will suffer this obstetric  
24  
25 complication; of the 752 primiparous women with OASIS in our study, 488 delivered  
26  
27 spontaneously, only 21 after shoulder dystocia, 39 from an infant in occiput posterior  
28  
29 presentation. In total 77% (580/752) of the primiparous women with OASIS delivered an  
30  
31 infant that was not macrosomic (>4000g). Actually, 38% of the women with OASIS delivered  
32  
33 an infant smaller than the mean infant birth weight (3500 g) in our study population.  
34  
35  
36  
37

38  
39 Medial and close to medial episiotomies have a higher risk for OASIS,[20]. Large  
40  
41 register studies show that mediolateral and lateral episiotomies have a protecting effect  
42  
43 against OASIS, particularly among primiparous women and in instrumental deliveries,[9, 10,  
44  
45 26-28]. Use of episiotomy was registered in our study, but type of episiotomy was not  
46  
47 registered, and improvement of performed episiotomy technique in order to avoid median cuts  
48  
49 was a part of the training package at our delivery unit.  
50

51  
52 During the study period, the use of episiotomy in our hospital decreased slightly in  
53  
54 spontaneous deliveries in primiparous women (from 24.7 to 22.7%), but increased in  
55  
56 instrumental deliveries in primiparous women (from 60.8 to 85.1%) (Table 1), and was shown  
57  
58  
59  
60

1  
2  
3 to be a protective factor against OASIS for primiparous women in both time periods (Table  
4  
5 4). Differences in effect of episiotomy between different parity groups on OASIS occurrence  
6  
7 can be explained by indication bias, a mix between cause and effect, as episiotomy is used in  
8  
9 deliveries with high OASIS risk. Multiparous women needing episiotomy may represent a  
10  
11 group of women with difficult delivery with many risk factors.  
12  
13

### 14 15 16 **Research and policy implications**

17  
18 We expected a more notable reduction of the incidences of OASIS in the subgroups with  
19  
20 lower risk (low or normal infant birth weight), as compared to women with higher risk (large  
21  
22 infant), if the perineal support program had been followed consistently in all deliveries. We  
23  
24 believe that a non-consistent use of perineum support in deliveries with lower risk for OASIS  
25  
26 could account for the results; the main clinical focus was on women with high risk for OASIS,  
27  
28 based on publications focusing on such risk factors. **Previous studies have shown that**  
29  
30 **antenatal scoring systems based on patient risk factors could not predict OASIS [29-31],**  
31  
32 **therefore methods that reduce risk for OASIS should be offered to all delivering women, not**  
33  
34 **only for women in high risk for OASIS.**  
35  
36  
37

38  
39 The training programme for perineal protection is a low-cost intervention requiring no  
40  
41 extra resources or equipment, only training of the existing staff. Such perineum protection  
42  
43 programmes **were** previously **successfully** implemented in five hospitals in Norway ,[17, 18],  
44  
45 therefore we can conclude that the programme is easily generalisable and applicable to other  
46  
47 settings than ours.  
48  
49

### 50 51 **Conclusions**

52  
53 Our study shows a large and rapid reduction of the incidence of OASIS following an  
54  
55 introduction of a perineum support programme, across all risk groups of OASIS. We suggest  
56  
57  
58  
59  
60

1  
2  
3 that future OASIS research should focus more on variables connected to delivery procedures,  
4 including perineal protection procedures during delivery, and not restricting risk analyses to  
5 demographic and individual obstetric data of the delivering woman or the infant. Using  
6 manual perineal protection is a low-cost intervention and requires no extra resources or  
7 equipment, except for training of the existing personnel. **The reduction of incidence of**  
8 **OASIS in the last time period of our study could not be explained by the differences in patient**  
9 **characteristics or risk factors across the study period, because the incidence of these risk**  
10 **factors in the two time periods were either the same or increased in the second time period.**  
11 **Our study indicates that training programme for improved perineal protection can reduce the**  
12 **risk of OASIS across all groups of delivering women, not only in high risk groups.**  
13  
14  
15  
16  
17  
18  
19  
20  
21  
22  
23  
24  
25  
26  
27

#### 28 References

- 29 1. Räisänen S, Vehviläinen-Julkunen K, Gissler M, Heinonen S. Up to seven-fold inter-  
30 hospital differences in obstetric anal sphincter injury rates- A birth register-based study in  
31 Finland. *BMC Res Notes* 2010;**3**:345.
- 32 2. Laine K, Gissler M, Pirhonen J. Changing incidence of anal sphincter tears in four Nordic  
33 countries through the last decades. *Eur J Obstet Gynecol Reprod Biol* 2009;**146**:71-5.
- 34 3. Pirhonen JP, Grenman SE, Haadem K, et al. Frequency of anal sphincter rupture at delivery  
35 in Sweden and Finland--result of difference in manual help to the baby's head. *Acta*  
36 *Obstet Gynecol Scand* 1998;**77**:974-7.
- 37 4. Prager M, Andersson KL, Stephansson O, Marchionni M, Marions L. The incidence of  
38 obstetric anal sphincter rupture in primiparous women: a comparison between two  
39 European delivery settings. *Acta Obstet Gynecol Scand* 2008;**87**:209-15.
- 40 5. Baghestan E, Irgens LM, Bordahl PE, Rasmussen S. Trends in risk factors for obstetric anal  
41 sphincter injuries in Norway. *Obstet Gynecol* 2010;**116**:25-34.
- 42  
43  
44  
45  
46  
47  
48  
49  
50  
51  
52  
53  
54  
55  
56  
57  
58  
59  
60

- 1  
2  
3 6. Laine K, Skjeldestad FE, Sanda B, Horne H, Spydslaug A, Staff AC. Prevalence and risk  
4 factors for anal incontinence after obstetric anal sphincter rupture. *Acta Obstet Gynecol*  
5 *Scand* 2011;**90**:319-24.  
6  
7
- 8  
9 7. Bols EM, Hendriks EJ, Berghmans BC, Baeten CG, Nijhuis JG, de Bie RA. A systematic  
10 review of etiological factors for postpartum fecal incontinence. *Acta Obstet Gynecol*  
11 *Scand* 2010;**89**:302-14.  
12  
13
- 14 8. Norderval S, Nsubuga D, Bjelke C, Frasunek J, Myklebust I, Vonen B. Anal incontinence  
15 after obstetric sphincter tears: incidence in a Norwegian county. *Acta Obstet Gynecol*  
16 *Scand* 2004;**83**:989-94.  
17  
18
- 19 9. de Leeuw JW, de Wit C, Kuijken JP, Bruinse HW. Mediolateral episiotomy reduces the  
20 risk for anal sphincter injury during operative vaginal delivery. *BJOG* 2008;**115**:104-8.  
21  
22
- 23 10. Räisänen SH, Vehviläinen-Julkunen K, Gissler M, Heinonen S. Lateral episiotomy  
24 protects primiparous but not multiparous women from obstetric anal sphincter rupture.  
25 *Acta Obstet Gynecol Scand* 2009;**88**:1365-72.  
26  
27
- 28 11. Räisänen S, Vehviläinen-Julkunen K, Gissler M, Heinonen S. High episiotomy rate  
29 protects from obstetric anal sphincter ruptures: a birth register-study on delivery  
30 intervention policies in Finland. *Scand J Public Health* 2011;**39**:457-63.  
31  
32
- 33 12. Dahl C, Kjolhede P. Obstetric anal sphincter rupture in older primiparous women: a case-  
34 control study. *Acta Obstet Gynecol Scand* 2006;**85**:1252-8.  
35  
36
- 37 13. Bowling CB, Wheeler Li TL, Gerten KA, Chapman VR, Burgio KL, Richter HE.  
38 Sphincter tears in primiparous women: is age a factor?. *Int Urogynecol J Pelvic Floor*  
39 *Dysfunct* 2008;**179**:600-4.  
40  
41
- 42 14. Gerdin E, Sverrisdottir G, Badi A, Carlsson B, Graf W. The role of maternal age and  
43 episiotomy in the risk of anal sphincter tears during childbirth. *Aust N Z J Obstet*  
44 *Gynaecol* 2007;**47**:286-90.  
45  
46  
47  
48  
49  
50  
51  
52  
53  
54  
55  
56  
57  
58  
59  
60

- 1  
2  
3 15. Räisänen S, Vehviläinen-Julkunen K, Gissler M, Heinonen S. The increased incidence of  
4  
5 obstetric anal sphincter rupture--an emerging trend in Finland. *Prev Med* 2009;**49**:535-40.  
6
- 7 16. Ekeus C, Nilsson E, Gottvall K. Increasing incidence of anal sphincter tears among  
8  
9 primiparas in Sweden: a population-based register study. *Acta Obstet Gynecol Scand*  
10  
11 2008;**87**:564-73.  
12
- 13 17. Laine K, Pirhonen T, Rolland R, Pirhonen J. Decreasing the incidence of anal sphincter  
14  
15 tears during delivery. *Obstet Gynecol* 2008;**111**:1053-7.  
16  
17
- 18 18. Hals E, Øian P, Pirhonen T, et al. A multicenter interventional program to reduce the  
19  
20 incidence of anal sphincter tears. *Obstet Gynecol* 2010;**116**:901-8.  
21  
22
- 23 19. Roos AM, Thakar R, Sultan AH. Outcome of primary repair of obstetric anal sphincter  
24  
25 injuries (OASIS): does the grade of tear matter?. *Ultrasound Obstet Gynecol*  
26  
27 2010;**36**:368-74.  
28
- 29 20. Coats PM, Chan KK, Wilkins M, Beard RJ. A comparison between midline and  
30  
31 mediolateral episiotomies. *Br J Obstet Gynaecol* 1980;**87**:408-12.  
32  
33
- 34 21. Hirsch E, Haney EI, Gordon TE, Silver RK. Reducing high-order perineal laceration  
35  
36 during operative vaginal delivery. *Am J Obstet Gynecol* 2008;**198**:668.e1,668.e5.  
37  
38
- 39 22. Jönsson ER, Elfaghi I, Rydhström H, Herbst A. Modified Ritgen's maneuver for anal  
40  
41 sphincter injury at delivery: a randomized controlled trial. *Obstet Gynecol* 2008;**112**:212-  
42  
43 7.  
44
- 45 23. McCandlish R, Bowler U, van Asten H, et al. A randomised controlled trial of care of the  
46  
47 perineum during second stage of normal labour. *Br J Obstet Gynaecol* 1998;**105**:1262-72.  
48  
49
- 50 24. Mayerhofer K, Bodner-Adler B, Bodner K, et al. Traditional care of the perineum during  
51  
52 birth. A prospective, randomized, multicenter study of 1,076 women. *J Reprod Med*  
53  
54 2002;**47**:477-82.  
55
- 56 25. Albers LL, Sedler KD, Bedrick EJ, Teaf D, Peralta P. Midwifery care measures in the  
57  
58  
59  
60



- 1  
2  
3 second stage of labor and reduction of genital tract trauma at birth: a randomized trial. *J*  
4  
5 *Midwifery Womens Health* 2005;**50**:365-72.  
6  
7 26. de Leeuw JW, Struijk PC, Vierhout ME, Wallenburg HC. Risk factors for third degree  
8  
9 perineal ruptures during delivery. *BJOG* 2001;**108**:383-7.  
10  
11 27. Räisänen S, Vehviläinen-Julkunen K, Gissler M, Heinonen S. Hospital-based lateral  
12  
13 episiotomy and obstetric anal sphincter injury rates: a retrospective population-based  
14  
15 register study. *Am J Obstet Gynecol* 2012;**206**:347.e1,347.e6.  
16  
17 28. Zafran N, Salim R. Impact of liberal use of mediolateral episiotomy on the incidence of  
18  
19 obstetric anal sphincter tear. *Arch Gynecol Obstet* 2012;.  
20  
21 29. Williams A, Tincello DG, White S, Adams EJ, Alfirevic Z, Richmond DH. Risk scoring  
22  
23 system for prediction of obstetric anal sphincter injury. *BJOG* 2005;**112**:1066-9.  
24  
25 30. Harkin R, Fitzpatrick M, O'Connell PR, O'Herlihy C. Anal sphincter disruption at vaginal  
26  
27 delivery: is recurrence predictable?. *Eur J Obstet Gynecol Reprod Biol* 2003;**109**:149-52.  
28  
29 31. Varma A, Gunn J, Lindow SW, Duthie GS. Do routinely measured delivery variables  
30  
31 predict anal sphincter outcome?. *Dis Colon Rectum* 1999;**42**:1261-4.  
32  
33  
34  
35  
36  
37  
38  
39  
40  
41  
42  
43  
44  
45  
46  
47  
48  
49  
50  
51  
52  
53  
54  
55  
56  
57  
58  
59  
60

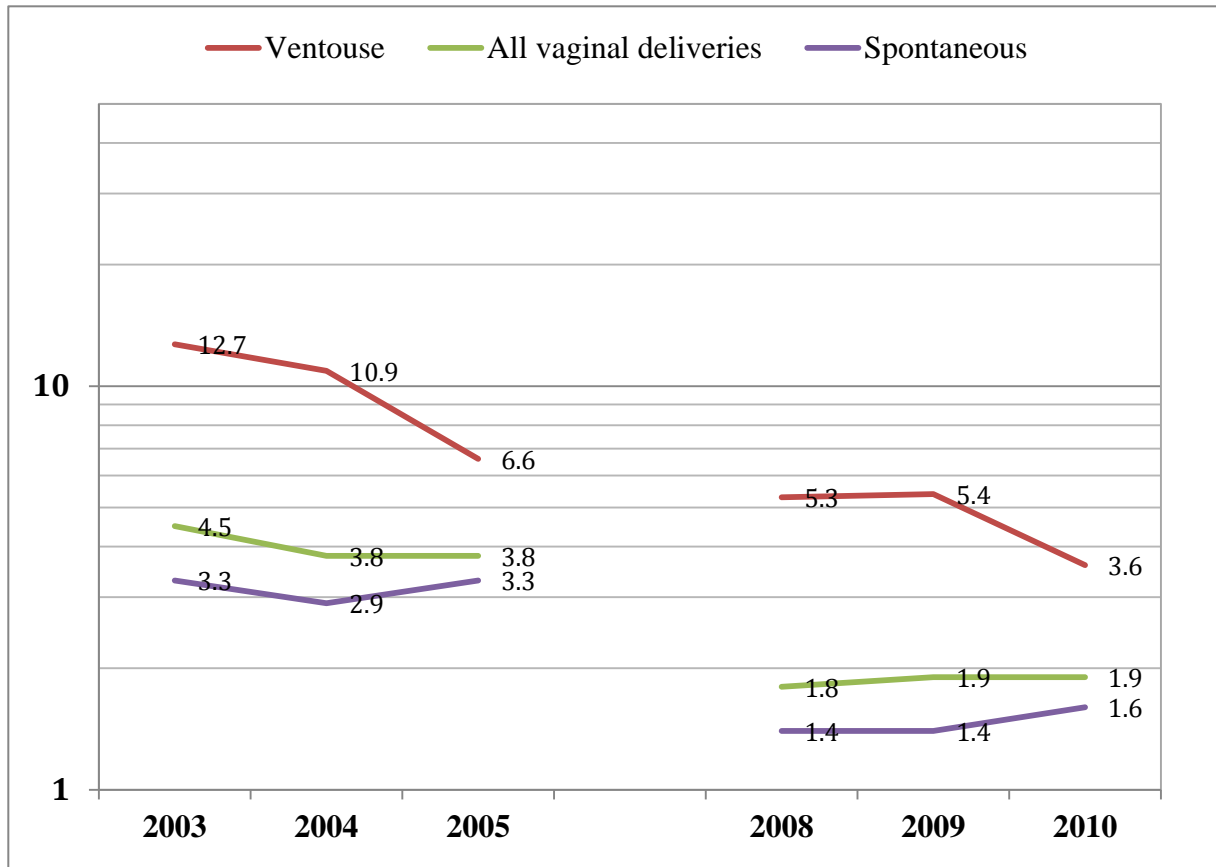

Figure 1 Frequency of OASIS (%) for different delivery methods during the study years.

Review only

## STROBE Statement—checklist of items that should be included in reports of observational studies

|                              | Item No | Recommendation                                                                                                                                                                                                                                                                                                                                                                                                                                                                                                                                                                                                                                                                                   |
|------------------------------|---------|--------------------------------------------------------------------------------------------------------------------------------------------------------------------------------------------------------------------------------------------------------------------------------------------------------------------------------------------------------------------------------------------------------------------------------------------------------------------------------------------------------------------------------------------------------------------------------------------------------------------------------------------------------------------------------------------------|
| <b>Title and abstract</b>    | 1 ok    | (a) Indicate the study's design with a commonly used term in the title or the abstract<br>(b) Provide in the abstract an informative and balanced summary of what was done and what was found                                                                                                                                                                                                                                                                                                                                                                                                                                                                                                    |
| <b>Introduction</b>          |         |                                                                                                                                                                                                                                                                                                                                                                                                                                                                                                                                                                                                                                                                                                  |
| Background/rationale         | 2 ok    | Explain the scientific background and rationale for the investigation being reported                                                                                                                                                                                                                                                                                                                                                                                                                                                                                                                                                                                                             |
| Objectives                   | 3 ok    | State specific objectives, including any prespecified hypotheses                                                                                                                                                                                                                                                                                                                                                                                                                                                                                                                                                                                                                                 |
| <b>Methods</b>               |         |                                                                                                                                                                                                                                                                                                                                                                                                                                                                                                                                                                                                                                                                                                  |
| Study design                 | 4 ok    | Present key elements of study design early in the paper                                                                                                                                                                                                                                                                                                                                                                                                                                                                                                                                                                                                                                          |
| Setting                      | 5 ok    | Describe the setting, locations, and relevant dates, including periods of recruitment, exposure, follow-up, and data collection                                                                                                                                                                                                                                                                                                                                                                                                                                                                                                                                                                  |
| Participants                 | 6 ok    | (a) <i>Cohort study</i> —Give the eligibility criteria, and the sources and methods of selection of participants. Describe methods of follow-up<br><i>Case-control study</i> —Give the eligibility criteria, and the sources and methods of case ascertainment and control selection. Give the rationale for the choice of cases and controls<br><i>Cross-sectional study</i> —Give the eligibility criteria, and the sources and methods of selection of participants<br>(b) <i>Cohort study</i> —For matched studies, give matching criteria and number of exposed and unexposed<br><i>Case-control study</i> —For matched studies, give matching criteria and the number of controls per case |
| Variables                    | 7 ok    | Clearly define all outcomes, exposures, predictors, potential confounders, and effect modifiers. Give diagnostic criteria, if applicable                                                                                                                                                                                                                                                                                                                                                                                                                                                                                                                                                         |
| Data sources/<br>measurement | 8*ok    | For each variable of interest, give sources of data and details of methods of assessment (measurement). Describe comparability of assessment methods if there is more than one group                                                                                                                                                                                                                                                                                                                                                                                                                                                                                                             |
| Bias                         | 9 ok    | Describe any efforts to address potential sources of bias                                                                                                                                                                                                                                                                                                                                                                                                                                                                                                                                                                                                                                        |
| Study size                   | 10 ok   | Explain how the study size was arrived at                                                                                                                                                                                                                                                                                                                                                                                                                                                                                                                                                                                                                                                        |
| Quantitative variables       | 11 ok   | Explain how quantitative variables were handled in the analyses. If applicable, describe which groupings were chosen and why                                                                                                                                                                                                                                                                                                                                                                                                                                                                                                                                                                     |
| Statistical methods          | 12 ok   | (a) Describe all statistical methods, including those used to control for confounding<br>(b) Describe any methods used to examine subgroups and interactions<br>(c) Explain how missing data were addressed<br>(d) <i>Cohort study</i> —If applicable, explain how loss to follow-up was addressed<br><i>Case-control study</i> —If applicable, explain how matching of cases and controls was addressed<br><i>Cross-sectional study</i> —If applicable, describe analytical methods taking account of sampling strategy<br>(e) Describe any sensitivity analyses                                                                                                                                |

Continued on next page

**Results**

|                  |       |                                                                                                                                                                                                                                                                                                                                                                                                               |
|------------------|-------|---------------------------------------------------------------------------------------------------------------------------------------------------------------------------------------------------------------------------------------------------------------------------------------------------------------------------------------------------------------------------------------------------------------|
| Participants     | 13*ok | (a) Report numbers of individuals at each stage of study—eg numbers potentially eligible, examined for eligibility, confirmed eligible, included in the study, completing follow-up, and analysed<br>(b) Give reasons for non-participation at each stage<br>(c) Consider use of a flow diagram                                                                                                               |
| Descriptive data | 14*ok | (a) Give characteristics of study participants (eg demographic, clinical, social) and information on exposures and potential confounders<br>(b) Indicate number of participants with missing data for each variable of interest<br>(c) <i>Cohort study</i> —Summarise follow-up time (eg, average and total amount)                                                                                           |
| Outcome data     | 15*ok | <i>Cohort study</i> —Report numbers of outcome events or summary measures over time<br><i>Case-control study</i> —Report numbers in each exposure category, or summary measures of exposure<br><i>Cross-sectional study</i> —Report numbers of outcome events or summary measures                                                                                                                             |
| Main results     | 16ok  | (a) Give unadjusted estimates and, if applicable, confounder-adjusted estimates and their precision (eg, 95% confidence interval). Make clear which confounders were adjusted for and why they were included<br>(b) Report category boundaries when continuous variables were categorized<br>(c) If relevant, consider translating estimates of relative risk into absolute risk for a meaningful time period |
| Other analyses   | 17ok  | Report other analyses done—eg analyses of subgroups and interactions, and sensitivity analyses                                                                                                                                                                                                                                                                                                                |

**Discussion**

|                  |       |                                                                                                                                                                            |
|------------------|-------|----------------------------------------------------------------------------------------------------------------------------------------------------------------------------|
| Key results      | 18ok  | Summarise key results with reference to study objectives                                                                                                                   |
| Limitations      | 19 ok | Discuss limitations of the study, taking into account sources of potential bias or imprecision. Discuss both direction and magnitude of any potential bias                 |
| Interpretation   | 20 ok | Give a cautious overall interpretation of results considering objectives, limitations, multiplicity of analyses, results from similar studies, and other relevant evidence |
| Generalisability | 21 ok | Discuss the generalisability (external validity) of the study results                                                                                                      |

**Other information**

|         |       |                                                                                                                                                               |
|---------|-------|---------------------------------------------------------------------------------------------------------------------------------------------------------------|
| Funding | 22 ok | Give the source of funding and the role of the funders for the present study and, if applicable, for the original study on which the present article is based |
|---------|-------|---------------------------------------------------------------------------------------------------------------------------------------------------------------|

\*Give information separately for cases and controls in case-control studies and, if applicable, for exposed and unexposed groups in cohort and cross-sectional studies.

**Note:** An Explanation and Elaboration article discusses each checklist item and gives methodological background and published examples of transparent reporting. The STROBE checklist is best used in conjunction with this article (freely available on the Web sites of PLoS Medicine at <http://www.plosmedicine.org/>, Annals of Internal Medicine at <http://www.annals.org/>, and Epidemiology at <http://www.epidem.com/>). Information on the STROBE Initiative is available at [www.strobe-statement.org](http://www.strobe-statement.org).

1  
2  
3  
4  
5  
6  
7  
8  
9  
10  
11  
12  
13  
14  
15  
16  
17  
18  
19  
20  
21  
22  
23  
24  
25  
26  
27  
28  
29  
30  
31  
32  
33  
34  
35  
36  
37  
38  
39  
40  
41  
42  
43  
44  
45  
46  
47  
48  
49  
50  
51  
52  
53  
54  
55  
56  
57  
58  
59  
60

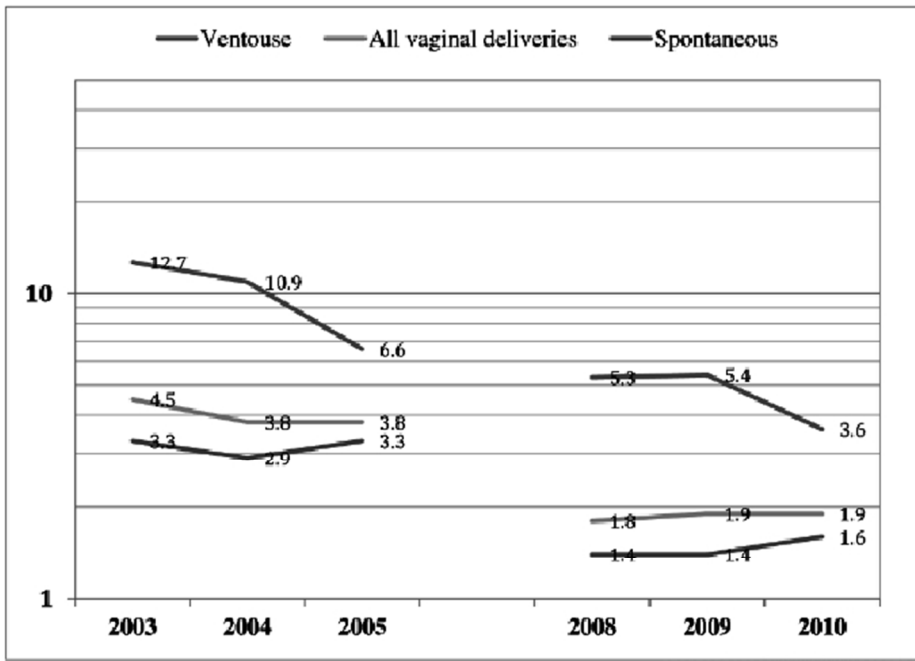

Figure 1 Frequency of OASIS (%) for different delivery methods during the study years.

view only
